1 **The impact of chromatin remodeling on gene expression at the single cell level in *Arabidopsis thaliana***

2 Andrew Farmer<sup>1</sup>, Sandra Thibivilliers<sup>2</sup>, Kook Hui Ryu<sup>3</sup>, John Schiefelbein<sup>3</sup>, and Marc Libault<sup>2\*</sup>

3

4 <sup>1</sup> National Center for Genome Resources, Santa Fe, New Mexico, USA

5 <sup>2</sup> Department of Agronomy and Horticulture, Center for Plant Science Innovation, University of  
6 Nebraska-Lincoln, Beadle Center, Lincoln, Nebraska, USA

7 <sup>3</sup> Department of Molecular, Cellular, and Developmental Biology, University of Michigan, Ann  
8 Arbor, MI, USA

9 \* Correspondence: marc.libault@unl.edu; Tel.: 1-402-472-4530

10

11 **Abstract**

12 Similar to other complex organisms, plants consist of diverse and highly specialized cell types. The gain of  
13 unique biological functions of these different cell types is the consequence of the establishment of cell-type-  
14 specific transcriptional programs and their associated regulatory mechanisms. Recently, single cell  
15 transcriptomic approaches have been applied on *Arabidopsis thaliana* root protoplasts allowing the accurate  
16 characterization of the transcriptional profiles of the cell-types composing seedling roots. As a first step in  
17 gaining a deeper understanding of the regulatory mechanisms controlling *Arabidopsis* gene expression, we  
18 report the use of single nucleus RNA sequencing (sNucRNA-seq) and single nucleus Assay for  
19 Transposase Accessible Chromatin sequencing (sNucATAC-seq) technologies on *Arabidopsis* roots. The  
20 comparison of our single nuclei transcriptomes to previously published protoplast transcriptomes validated  
21 the use of nuclei as biological entities to establish cell-type specific transcriptomes from multicellular  
22 organs. Furthermore, our sNucRNA-seq results uncovered the transcriptome of additional cell subtypes not  
23 identified by scRNA-seq. Similar to our transcriptomic approach, the sNucATAC-seq approach led to the

24 distribution of the Arabidopsis nuclei into distinct clusters suggesting the differential remodeling of the  
25 chromatin between groups of cells according to their identity. To reveal the impact of chromatin remodeling  
26 on gene transcription, we integrated sNucRNA-seq and sNucATAC-seq data and demonstrated that cell-  
27 type-specific marker genes also display cell-type-specific pattern of chromatin accessibility. Our data  
28 suggest that the differential remodeling of the chromatin is a critical mechanism to regulate gene activity at  
29 the cell-type level.

30

## 31 **Introduction**

32 The gain of unique biological functions by the various cell-types composing a plant depends on  
33 their differential use of the same genomic information to produce cell-type-specific transcriptional profiles.  
34 The differential use of the genomic information between cells and cell-types is thought to rely, in  
35 part, on the differential remodeling of the chromatin. Changes in the landscape of chromatin  
36 fiber influences the accessibility of the genomic DNA for regulatory proteins such as  
37 transcription factors. This latter statement is supported by the human ENCODE project, which  
38 recently revealed that the establishment of a chromatin landscape at the single cell level was  
39 highly informative to reveal putative TF-binding sites [1]. Ultimately, each plant cell will  
40 activate or repress specific sets of genes to fulfill the biological functions inherent to their cell-  
41 type and their response to environmental stresses. In animal science, single cell RNA-seq  
42 (scRNA-seq) and ATAC-seq [2] technologies have been successfully applied across various cell-  
43 types and tissues to better understand the impact of the dynamic remodeling of the chromatin on  
44 gene expression [3-6]

45 Recently, scRNA-seq approaches have been applied to Arabidopsis root protoplasts, allowing the  
46 accurate characterization of the transcriptional profiles of thousands of cells and their differential regulation  
47 in mutants or in response to a stress [7-11]. These studies revealed the power of single cell technologies to

48 establish the transcriptomic maps of various Arabidopsis root cells and cell-types and the dynamic  
49 regulation of gene expression during cell development. However, using plant protoplasts as biological  
50 entities to analyze gene expression is problematic. For example, some cell types are resistant to cell wall  
51 digestion [e.g., stele cells [7-11]], the protoplasting procedure itself has a significant impact on gene  
52 expression [7], and there is a bias toward sequencing of smaller-sized cells/protoplasts [7]. In addition, the  
53 effective isolation of plant protoplasts requires the development of particular cell-wall degrading  
54 enzymatic cocktails tailored for the differential biochemical composition of the cell wall existing  
55 between plant species, the developmental stage of the cell (i.e., differential biochemical  
56 composition between the primary and secondary cell wall), and the relative position of the root  
57 cell (i.e., external vs. internal locations) [12, 13].

58 As an alternative to protoplasts, bulks of plant nuclei have been used to gain transcriptomic  
59 information from plant cells. For instance, transcriptomes were established from nuclei populations using  
60 Isolation of Nuclei from TAgged specific Cell Types (INTACT) technology on rice roots [14],  
61 Arabidopsis embryos [15], and seed endosperm [16]. Also, taking advantage of the nuclear ploidy of the  
62 cells composing the pericarp tissue of the developing tomato fruits, Pirello et al., (2018) analyzed the  
63 expression of tomato genes using a population of nuclei characterized by various levels of endoreduplication  
64 [17]. Nevertheless, these methods also suffer from various limitations. For instance, the use of the INTACT  
65 technology presupposes the identification of cell-type-specific marker genes to express a reporter gene and  
66 require the generation of transgenic material.

67 To overcome some of the challenges associated with the generation and manipulation of  
68 plant protoplasts, we tested the use of isolated plant nuclei to establish the transcriptome of  
69 thousands of plant single cells. Previous single nuclei transcriptomic experiments conducted on  
70 various animal systems suggest that nuclei could be used to establish biologically meaningful  
71 transcriptomic information compared to isolated cells [18, 19]. Our data reveal high similarities

72 existing between the nuclear and protoplast transcriptomes and the discovery of additional root cell-type  
73 transcriptomes that support the use of isolated nuclei as valuable biological entities to access single cell gene  
74 expression. To gain a deeper understanding of the regulatory mechanisms controlling gene  
75 expression in and between Arabidopsis root cells and cell-types, we also developed and applied  
76 single nuclei ATAC-seq (sNucATAC-seq). SNucATAC-seq revealed cell-type-specific  
77 remodeling of the chromatin and dynamic changes occurring in chromatin remodeling during  
78 cell differentiation and development. Upon establishing the unique and conserved chromatin  
79 landscapes for each major Arabidopsis root cell type, we integrated sNucRNA-seq and  
80 sNucATAC-seq datasets to identify promoter/enhancer sequences that likely regulate expression  
81 of nearby genes in a cell-type-specific manner, depending on the accessibility of the chromatin  
82 fiber. Altogether, we propose a set of “rules” governing the influence of chromatin accessibility  
83 on Arabidopsis gene activity.

84

## 85 **Results and Discussion**

### 86 Arabidopsis root nuclei generate biologically meaningful transcriptomic datasets.

87 Nuclei from Arabidopsis seedling roots were purified and used with the 10X Genomics  
88 Chromium platform to create sNucRNA-seq libraries (Supplemental Figure 1). To accurately  
89 compare sNucRNA-seq and scRNA-seq transcriptomes, the Arabidopsis seedlings were grown  
90 and primary roots were isolated as described by Ryu et al., (2019) [9]. Across five independent  
91 biological replicates, we sequenced the transcriptome of 10,608 nuclei (See Supplemental Table  
92 1 for sequencing details). Because some nuclear transcripts might not be spliced, we applied a  
93 "pre-mRNA" strategy to include intron-mapping reads. We obtained a mean of 1,126 expressed  
94 genes per nucleus, allowing the identification of 24,740 expressed genes out of the 27,416

95 predicted Arabidopsis protein-coding genes (90.2%). As a comparison, the transcriptome of  
96 7,473 selected Arabidopsis protoplasts by Ryu et al., (2019) [9] allowed the detection of 4,751  
97 expressed genes per cell and a total of 25,371 expressed genes (92.5%). We suggest that the  
98 higher number of expressed genes identified per protoplasts *vs.* nucleus is the consequence of the  
99 larger and more complex pool of polyadenylated transcripts in one cell *vs.* one nucleus, due to  
100 the accumulation of transcripts and their relative stability (i.e., the half-life of the cellular mRNA  
101 is estimated at 9 hours in human cells [20]). This conjecture also suggests that the nuclear  
102 transcriptome represents a snapshot of the dynamic transcriptional activity of the genes while the  
103 cellular transcriptome may represent an integration of gene activity overtime.

104 To evaluate the biological significance of the nuclear transcriptomes obtained from the  
105 sNucRNA-seq data, we performed correlation analyses between bulk RNA-seq from intact  
106 whole roots and from protoplast suspensions, and pseudo-bulk RNA-seq from root protoplasts  
107 and nuclei that were processed through scRNA-seq [9] and sNucRNA-seq technologies (present  
108 study). The transcriptome of intact whole roots is highly correlated with the transcriptome of a  
109 suspension of protoplasts and with both pseudo-bulked scRNA-seq and sNucRNA-seq datasets  
110 (i.e., Spearman's Rank Correlation Coefficient = 0.902, 0.886, and 0.876 for all genes, = 0.905,  
111 0.889, 0.878 upon excluding known protoplast-responsive genes [21], respectively). These  
112 results reveal that the sNucRNA-seq transcriptome of the Arabidopsis root is as highly correlated  
113 to a whole root transcriptome than protoplast-based transcriptomes. Overall, single nuclei-based  
114 transcriptome reflect well the transcriptome of a complex organ such as the Arabidopsis root.

115 Taking advantage of the capability of the Seurat package to integrate independent  
116 datasets [22, 23], we co-clustered 10,608 Arabidopsis root nuclei with 7,473 Arabidopsis root  
117 protoplasts [9] according to their transcriptomic profiles. Applying Uniform Manifold

118 Approximation and Projection (UMAP), a dimensionality reduction technique which enhanced  
119 the organization of nuclei/cell clusters compared to tSNE [24], the Arabidopsis root nuclei and  
120 protoplasts were clustered into 21 and 18 different groups, respectively (Figure 1A). UMAP  
121 visualization clearly reveals the overlapping distribution existing between the 18 co-  
122 characterized clusters and confirms the identification of three new clusters upon applying  
123 sNucRNA-seq technology (clusters #16 and 19 include over 97% of nuclei and only 3% of  
124 protoplasts; while cluster #20 is exclusively composed by nuclei; Figure 1A, red circles).

125 To further evaluate the biological relevance of the sNucRNA-seq approach, we compared  
126 the percentages of protein-coding genes found expressed or not expressed using sNucRNA-seq  
127 and scRNA-seq technologies across the 18 co-characterized clusters (Figure 1B). Among the  
128 27,416 Arabidopsis protein-coding genes, 30.9 (cluster #1) to 44.8% (cluster#10) were found not  
129 to be expressed by both sNucRNA-seq and scRNA-seq technology while 40.6% (cluster #18) to  
130 59.1% (cluster #1) were found expressed by applying both technologies (Supplemental Figure 2).  
131 Only a small percentage of genes were found expressed using only one technology or the other  
132 [i.e., an average of 4.9% and 7.4% of the Arabidopsis genes were found expressed using  
133 sNucRNA-seq or scRNA-seq, respectively (Supplemental Figure 2)]. Taken together, these  
134 results revealed that over 80% of the expressed Arabidopsis protein-coding genes were detected  
135 by both sNucRNA-seq and scRNA-seq (Supplemental Figure 3). Excluding the clusters that are  
136 unique to sNucRNA-seq, the percentage of expressed genes per cluster identified using  
137 sNucRNA-seq technology (from 42.9 to 63.3 %) is not significantly different compared to the  
138 percentage of expressed genes per cluster identified using scRNA-seq technology (from 50.5 to  
139 64.9%) (i.e., Student t test:  $P > 0.136$ ; Figure 1B). These results show that the cellular and nuclear  
140 transcriptomes provide similar transcriptomic information and suggest that isolated plant nuclei  
141 can be utilized to establish meaningful transcriptomic information at the single cell-type level.

142 Through the identification of three new cell clusters, our data also suggest that the sNucRNA-seq  
143 approach captures a more diverse and representative population of Arabidopsis root cell-types  
144 compared to scRNA-seq.

145

#### 146 Functional assignment of Arabidopsis root cell clusters.

147 Taking advantage of recently published Arabidopsis root single cell transcriptomes [7-11] and the  
148 current bibliography [25-28], we created a list of 103 cell-type marker genes (Supplemental Table  
149 2). To assign biological entities to the 21 Arabidopsis clusters, we looked for the accumulation of  
150 transcripts for these marker genes (Figure 2A and B; Supplemental Figure 4). This strategy allowed us  
151 to characterize five major groups of cells: trichoblasts (clusters #6, 10, 13, and 14), atrichoblasts (clusters #1,  
152 2, 7, and 12), cortex (clusters #0, 8, 16, and 20), endodermal (clusters #4, 8, 11, 16, and 18), and stele cells  
153 (clusters #3, 5, 9, 15, and 17) (Figure 2A). In addition, we observed the accumulation of transcripts of  
154 marker genes of the quiescent center in the cells and nuclei composing the cluster #1. We were also able to  
155 more specifically assign the different cell types composing the stele and characterize the developing vs.  
156 mature trichoblasts and endodermal cells (Figure 2A).

157 The topology of the clusters generated by the UMAP technique reveal the functional organization  
158 of the cells and nuclei in and between the cell-types compared to previous reports using tSNE to cluster  
159 Arabidopsis protoplasts [8, 11]. For instance, the undifferentiated cells of the roots found in cluster #1  
160 are localized in the center of the UMAP map. Originated from cluster #1, several elongated  
161 projections of cells (e.g., clusters #8, 12, 14, and 18) end with more globular clusters (e.g.,  
162 clusters #0, 2, 3, 4, 5, 7, 9, 10, and 13). The elongated clusters likely reflect the progressive  
163 changes occurring in the transcriptomic programs during cell differentiation whereas the globular  
164 clusters represent the differentiated cells composing the Arabidopsis roots.

165           Among the three clusters specifically defined using sNucRNA-seq technology (i.e., clusters #16, 19  
166           and 20; Figures 1A and 2A), cluster #16 could be divided into two different sub-groups which are  
167           characterized by the activity of endodermal and cortex marker genes, respectively [i.e., the AT1G61590  
168           (*PBL15*), AT2G40160 (*TBL30*), AT2G48130, and AT4G17215 as endodermal marker genes; the  
169           AT5G18840 and AT3G21670 (*NPF6.4/NRT1.3*) as cortical marker genes; Supplemental Figure 5 (red and  
170           blue circles, respectively); Supplemental Table 2]. This observation is also supported by the relative UMAP  
171           localization of the cluster#16 that connects the endodermis and cortex cell clusters (Figure 2A). Cluster #16  
172           is also characterized by the specific expression of genes encoding peroxidases (e.g., AT1G68850,  
173           AT2G35380) and GDSL-motif esterase/acyltransferase/lipase (e.g., AT2G23540, and AT5G37690 [29])  
174           (Supplemental Figure 5, blue arrows). Members of the *GDSL* family such as the rice *WDL1* and the tomato  
175           *GDSL1* genes control the process of cellular differentiation [30-32] suggesting that the cluster #16 might  
176           contain differentiating cells. This hypothesis is supported by the role of root peroxydases in controlling the  
177           production of reactive oxygen species to regulate cell elongation and differentiation [33]. Interestingly, the  
178           *UPBEATI* gene (AT2G47270) has been identified as a major repressor of the transcriptional activity of  
179           peroxidases genes and ROS distribution, and a negative regulator of the size of the Arabidopsis root apical  
180           meristem by modulating the balance between cell proliferation and differentiation [33]. Mining the UMAP  
181           clusters, we found that *UPBEATI* is broadly expressed at the exception of the clusters #10, 16, 19, and 20  
182           (Supplemental Figure 5, black arrows). GDSL lipases are also playing a central role in cutin biosynthesis  
183           [34]. Mining the sc/sNucRNA-seq datasets, we identified many other genes preferentially expressed in  
184           cluster #16 and involved in the biosynthesis of suberin and cutin [e.g.  $\alpha/\beta$  hydrolases (AT4G24140), *GPAT5*  
185           that plays a central role in suberin biosynthesis (AT3G11430) [35, 36], AT1G49430, AT2G38110, *GPTA4*  
186           (AT1G01610) and 8 (AT4G00400) [37], and another GDSL-like lipase (AT1G74460) [37]; Supplemental  
187           Figure 5 (blue arrows)]. Previous studies revealed that suberin and cutin are notably deposited at the location  
188           of the emergence of lateral roots [38]. Taken together, the transcriptional pattern of the *UPBEATI*,



189 peroxidases, *GDSL* genes, and other suberin/cutin biosynthesis-related genes, associated with the activity of  
190 both cortical and endodermal marker genes suggest that the cells associated with the cluster #16 are  
191 associated with the emerging lateral roots.

192 Cluster #19 (Figure 2A) is characterized by the specific expression of *CEP1* (AT5G50260) and  
193 *EXII* (AT2G14095) (Supplemental Figure 6), two genes previously characterized as regulators of the cell  
194 death program in the root cap [27]. In addition, we identified *KIRAI* (AT4g28530), a gene controlling cell  
195 death during flower development [39], as specifically expressed in cluster #19. Additional cell death marker  
196 genes (i.e., *BFNI*, *RNS3*, *SCPL48*, *DMP4*, and *PASPA3*) were also found specifically expressed in cluster  
197 #19 (Figure 2B) and in a subset of the xylem cluster #17 [27]. Previous studies showing that the cell death  
198 programs play critical roles in the development of the xylem and root cap [40, 41] support the specific  
199 activity of these cell death marker genes in the xylem cluster #17 and the assignment of the cells composing  
200 cluster #19 as root cap cells. Interestingly, we also noticed the specific expression of two genes encoding  $\alpha/\beta$   
201 hydrolases in cluster #19 (e.g., AT4G18550, AT1G73750; Supplemental Figure 6). We hypothesize that  
202 these genes might play a role in the accumulation of cutin and suberin in the external layer of the  
203 Arabidopsis root cap [38]. The characterization of the transcriptome of the cells in the clusters #16 and 19  
204 from isolated nuclei and not from isolated protoplasts could be due to the low digestibility of the cell wall of  
205 these cells, a consequence of the accumulation of suberin and cutin.

206 Cluster #20 (Figure 2A) is characterized by the expression of a subset of the cortex-specific marker  
207 genes (e.g., AT5G18840 and AT3G21670 (*NPF6.4/NRT1.3*); Supplemental Figure 7; Supplemental Table  
208 2; [7-9]). Among the genes specifically expressed in this cluster, *SCRAMBLED/STRUBBELIG* (*SCM*,  
209 AT1G11130) plays a critical role in the patterning of the root epidermal cells [42] (Supplemental Figure 7).  
210 The specific clustering of the *SCRAMBLED/STRUBBELIG*-expressing cells is further supported by the  
211 expression of several genes involved in lipid metabolism in cluster #20 [e.g., AT1G45201 (*TLL1*;

212 triacylglycerol lipase-like 1); AT5G63560 (HXXXD-type acyl-transferase); Supplemental Figure 7].  
213 Membrane lipid remodeling has been shown to also play a critical role in root hair cell differentiation [43,  
214 44]. Taken together, the cortical cells composing cluster #20 are hypothesized to play a role in the  
215 differentiation and patterning of the Arabidopsis epidermal root cells.

216

### 217 Single-cell resolution ATAC-seq reveals the impact of chromatin folding on gene expression.

218 While genomic information is almost identical between somatic cells (i.e., with the  
219 exception of somatic mutations), its differential use, notably through differential chromatin  
220 accessibility between cells, is required in order to fulfill their unique biological function through  
221 cell-type specific transcriptional regulation of the genes [45-48]. To date, bulk RNA- and  
222 ATAC-seq datasets have shown low correlations [45]. This could be the consequence of the  
223 cellular heterogeneity of the samples used. This hypothesis is supported by the human ENCODE  
224 project, which recently revealed that the establishment of a chromatin landscape at the single cell  
225 level was highly informative to reveal putative TF-binding sites [1]. To better evaluate the  
226 impact of chromatin remodeling in controlling plant gene expression between cells and cell  
227 types, we applied 10x Genomics sNucATAC-seq technology on 6768 Arabidopsis root nuclei  
228 isolated from two independent biological replicates.

229 Upon paired-end sequencing, a median of 10,253 independent genomic DNA fragments  
230 per nucleus were mapped against the Arabidopsis genome and a total of 20,803 accessible sites  
231 were characterized. As a comparison, Lu et al., (2017) and Tannenbaum et al., (2018) identified  
232 around 20,000 and 40,000 accessible sites from bulk ATAC-seq analyses conducted on  
233 Arabidopsis seedling and roots, respectively [49, 50]. As previously reported [49], we observed  
234 that the accessible regions of the chromatin are mostly located near transcription start sites

235 (TSSs) where are located cis-regulatory elements (Figure 3A). Hypothesizing that each  
236 Arabidopsis root cell type is characterized by discrete and unique profiles of the remodeling of  
237 the chromatin fiber to control the activity of cell-type-specific genes, we applied the UMAP  
238 algorithm to cluster the 6768 nuclei into 21 different groups according to their chromatin folding  
239 profiles (Figure 3B).

240 To better estimate the gain in resolution of sNucATAC-seq versus bulk ATAC-seq  
241 datasets and to estimate the potential of sNucATAC-seq technology to reveal discrete changes in  
242 chromatin remodeling, we first compared the sNucATAC-seq and bulk ATAC-seq profiles  
243 generated from Arabidopsis root nuclei at one locus (i.e., chr1: 21,067,500–21,103,000) [50].  
244 Across the 21 clusters, we can clearly identify the same major peaks revealed by bulk ATAC-seq  
245 technology [50] (Figure 3C, green boxes). Furthermore, our sNucATAC-seq approach revealed  
246 additional peaks but only in a subset of the 21 clusters (Figure 3C, red arrows). This first targeted  
247 analysis suggests that a single cell resolution ATAC-seq analysis has the potential to reveal  
248 discrete and cell-type-specific loci of accessible chromatin. These results also support the idea  
249 that the 21 sNucATAC-seq clusters are characterized by unique combinations of open chromatin  
250 loci. We conducted further analyses to reveal how cell-type chromatin accessibility play a critical  
251 role in controlling gene expression.

252 Considering that chromatin accessible sites are pre-required to promote gene expression,  
253 we assume that cell-type-specific ATAC-seq peaks located nearby the TSS contribute to the  
254 regulation of expression of cell-type marker genes (i.e., the peaks have at least one base pair  
255 overlap with the annotated transcripts, and extend upstream). Accordingly, we searched for  
256 correlations between the presence/absence of open chromatin nearby the TSS of genes and their  
257 transcriptional activity by integrating sNucATAC-seq and sc/sNucRNA-seq analysis using the

258 Signac package v0.2.5 [51]. This strategy led to the annotation of the 21 sNucATAC-seq clusters  
259 similarly to the sc/sNucRNA-seq clusters (i.e., from 0 to 20; Figure 3B). We noticed that the  
260 sNucATAC-seq root cell clusters share a similar topography as the 21 sNuc/scRNA-seq clusters.  
261 First, the sNucATAC-seq UMAP clusters #6, 10, and 13; cluster #7; clusters #3, 5, 9, and 17;  
262 clusters #4, 11, 16, and 18; and clusters #0 and 20 which are composing the trichoblasts, the  
263 atrichoblasts, and the stele, endodermal, and cortical cells, respectively, are grouped in super-  
264 clusters which are similar to the sNucRNA-seq super-clusters (Figures 2A and 3B). Second, we  
265 noticed that, similar to the organization of the sc/sNucRNA-seq clusters, the sNuc-ATAC-seq  
266 clusters associated with undifferentiated and differentiating cells (i.e., clusters #1, 8, 12 and 14)  
267 are located in the center of the sNucATAC-seq UMAP map while the clusters associated with  
268 differentiated cells are located at its periphery. These similar topographies suggest that chromatin  
269 remodeling and gene expression could be both used as molecular markers to annotate plant cell-  
270 types and support the correlation existing between chromatin folding and the transcriptional  
271 activity of the Arabidopsis genes. The latter is supported by a targeted comparative analysis  
272 between the expression profile and the chromatin folding of few marker genes (Supplemental  
273 Figure 8).

274 To further reveal the anchorage existing between sc/sNucRNA-seq and sNucATAC-seq  
275 experiments, we performed a correlation analysis between the expression of Arabidopsis marker  
276 genes and the folding of the chromatin at the location of their TSSs. Upon mining the scRNA-  
277 seq and sNucRNA-seq datasets, we selected the top 20 marker genes from each cluster based on  
278 their fold-change of expression compared to other clusters and p-values. Due to some  
279 redundancy between clusters, we identified a total of 378 unique marker genes. Among them,  
280 337 are characterized by at least one sNucATAC-seq peak near their TSSs (Supplemental Table  
281 3). As a comparison, we also performed a similar analysis on 628 Arabidopsis root housekeeping

282 (HK) genes (i.e., genes expressed in at least in 50% of the cells and nuclei composing each  
283 cluster, across all the 20 and 21 scRNA-seq and sNucRNA-seq clusters, respectively, and with  
284 identified TSS-associated sNucATAC-seq peaks; Supplemental Table 4).

285       Upon normalization of their expression patterns and peak distribution across the different  
286 clusters, the marker and HK genes were distributed in 20 different bins based on their  
287 transcriptional activity and chromatin remodeling profiles. Applying the Kendall's Tau-b rank  
288 correlation test for non-normally distributed data on the marker genes, we observed significant  
289 positive correlations between almost all the co-annotated sc/sNucRNA-seq and sNucATAC-seq  
290 datasets (Figure 4, see blue squares in the dark blue box; p-value <0.01). This result supports that  
291 the differential accessibility of the chromatin fiber correlates with the expression patterns of  
292 cluster marker genes. The similarity between the Kendall tau-b correlation maps when using the  
293 scRNA-seq and sNucRNA-seq datasets also supports the biological relevance of a single nucleus  
294 transcriptome compared to the single cell transcriptome. Based on these results, we assume that,  
295 similarly to their transcriptional activity, the remodeling of the chromatin at the location of the  
296 TSS of selected genes can be used as a molecular marker of cell type identity. As a comparison,  
297 the sc/sNucRNA-seq and sNucATAC-seq correlation analysis of the 628 HK genes only  
298 revealed few significant and more moderate correlations (Supplemental Figure 9); likely a  
299 reflection of the ubiquitous expression of these genes and the similar accessibility of the  
300 chromatin fiber near their TSS and across all the Arabidopsis root clusters.

301       When considering the marker genes, positive and significant correlations between  
302 sc/sNucRNA-seq and sNucATAC-seq datasets were also repetitively observed when considering  
303 the clusters that belong to the same super clusters (i.e., the “endodermis”, “stele”, “trichoblast”  
304 and “trichoblast” superclusters; Figure 4, see blue squares in the green boxes). This result

305 suggests that the cells composing the same tissue share, to some extent, similar transcriptomic  
306 and epigenomic signature profiles that are likely required to fulfill their tissue-specific biological  
307 functions. One exception is the cells composing the xylem (i.e., cluster #17) that seem to have  
308 unique transcriptomic and epigenomic profiles. The significant correlation existing between gene  
309 expression and chromatin remodeling suggest that the position of the nucleosomes on the double  
310 strand of the gDNA, nearby the TSS of the genes, plays a critical role in controlling the activity  
311 of the marker genes.

312 We also noticed positive correlations between clusters that do not belong to the same  
313 cell-types but that share similar developmental stages. For instance, the cells composting the  
314 clusters #1, 8 and 12, cells that are likely going through a differentiation process, and the cells  
315 composting the cortical and atrichoblast clusters #0, 2 and 7 share similar epigenomic and  
316 transcriptomic features (Figure 4B, see blue squares in the black boxes). These results are  
317 supported by the relative proximity of these clusters on the UMAP RNA- and ATAC-seq maps  
318 (Figure 2A and 3B). These data suggest that these cell types share similar transcriptomic  
319 programs despite their distinct ontology. In the case of the clusters#1, 8 and 12, we hypothesize  
320 that these shared programs are important in controlling plant cell differentiation and elongation  
321 processes.

322

323 The remodeling of the chromatin at the single-cell resolution ATAC-seq can be used as a molecular marker  
324 of the root hair cell-type.

325 Plant single cell types are annotated based on the expression profile of maker genes [7-  
326 11]. Correlation analyses between gene expression and chromatin remodeling (Figure 4) suggest  
327 that the latter could also be used as another molecular marker of the cell-types composing the

328 Arabidopsis root. This conclusion is supported by similar analyses conducted on various animal  
329 organs and on selected plant cells [46, 52, 53]. To further test this hypothesis, we took advantage  
330 of our single cell resolution ATAC-seq datasets and focused our analysis on the three clusters  
331 representative of the mature Arabidopsis root hair cells (i.e., clusters #6, 10 and 13; Figure 2A  
332 and 5B) that share significant correlations between their transcriptome and epigenome (Figure 4,  
333 purple boxes). To validate the use of the differential chromatin accessibility as a molecular  
334 marker of plant cell identity, we first looked for the sNucATAC-seq peaks that are preferentially  
335 identified at least in two out of these three root hair clusters (fold-change of the average value  
336 across the root hair clusters versus the next highest non-root hair cluster  $\geq 2$ ). Among the 20,803  
337 sNuc-ATAC-seq peaks, 134 were preferentially identified in the root hair mature clusters.  
338 Among them, 63 are clearly located in the TSS of annotated Arabidopsis genes. Mining the sc  
339 and sNucRNA-seq datasets, we identified 55 out of the 63 genes (87.3%) specifically expressed  
340 in Arabidopsis root hair cells independently of the transcriptomic dataset used (Figure 5;  
341 Supplemental Table 5). Among them, three genes (i.e., AT1G49100, AT1G26250, AT4G22650)  
342 were found expressed at such low level that their transcripts were detected by only sc or  
343 sNucRNA-seq technology. The remaining eight genes (i.e., AT1G07450, AT1G12050,  
344 AT2G21540, AT3G29810, AT3G53820, AT3G12530, AT5G39100, and AT5G41290) were not  
345 found as preferentially expressed in root hair cells. Initiating our analysis by identifying the  
346 peaks of accessible chromatin specific to the clusters #6, 10, and 13 led to the identification of  
347 associated root hair maker genes. In addition to support the role of chromatin remodeling in  
348 controlling gene expression in plant cells, this work highlights that the remodeling of the  
349 chromatin can be used as a molecular marker to annotate specific cell types.

350

## 351 **Conclusions**

352           In this manuscript, we describe the use of isolated nuclei as an alternative approach to the  
353 use of plant protoplasts to obtain biologically informative transcriptomic information at the  
354 single cell level. Starting with a limited pool of poly-adenylated transcripts, the number of  
355 transcripts sequenced and, consequently, the number of expressed genes per nucleus are lower  
356 compared to the protoplast-based approach (Supplemental Table 1). However, we found that the  
357 nuclear transcriptome strongly correlates with the cellular transcriptome (Figure 2).  
358 Unexpectedly, the sNucRNA-seq technology complements the published protoplast-based  
359 Arabidopsis root transcriptome by defining one new cell clusters (i.e., cluster #20), and by  
360 substantially enriching for two additional clusters (i.e., clusters #16 and 19).

361           We also describe a global map of chromatin accessibility of the Arabidopsis root at a  
362 single cell-resolution. This level of resolution revealed the unique and conserved usage of the  
363 genomic information between the cells. Assuming that cluster-specific remodeling of the  
364 chromatin could be associated with a cluster-specific transcriptome, and, therefore, with a  
365 specific Arabidopsis root cell type, we performed a multimodal integration between chromatin  
366 accessibility and transcriptomic profiles using a set of cell-type marker genes. Independently of  
367 the use of scRNA-seq or sNucRNA-seq, we were able to highlight significant correlations  
368 between the two types of datasets for co-annotated clusters. Interestingly, a significant  
369 correlation exists between clusters that are not co-annotated but that belong to the same super-  
370 clusters (Figure 4). Together, our data support a role for chromatin accessibility in controlling  
371 gene expression. They also demonstrate that many marker genes exhibit cell-type specific  
372 remodeling of the chromatin. To further explore this, we performed a reverse analysis by first  
373 identifying accessible chromatin near TSSs and then mining our sc/sNucRNA-seq dataset. In this



374 way, we were able to confirm that open chromatin near the TSS correlates well with  
375 transcriptionally active genes in specific cell clusters. Thus, our work reveals that the chromatin  
376 accessibility could be used as another molecular marker of plant cell types.

377 The use of nuclei to access both transcriptomic and epigenomic datasets can be further  
378 explored by analyzing the role of epigenomic marks in gene expression. Expanding the portfolio  
379 of single nuclei –omics technologies would help understand the influence of epigenome and  
380 epigenomic marks on gene expression. In addition, multiomic approaches at the level of single  
381 nuclei could enhance comparative analysis between plant species. The use of isolated nuclei  
382 avoids many of the technical and biological difficulties associated with protoplasts and so will  
383 likely enable the broad analysis of gene expression across different species and tissues.

384

## 385 **Methods**

### 386 Plant growth

387 *Arabidopsis* (*Arabidopsis thaliana*, Col-0 ecotype) seeds were surface sterilized using ethanol  
388 70% then a 30% (v/v) bleach, 0.1% (v/v) Triton X-100 solution for 5 min each. The seeds were  
389 then placed on Murashige and Skoog (MS) growth media agar plate under 16 light and 8 dark  
390 conditions. Seven days after germination, the primary roots of around 150 seedlings were  
391 isolated from the seedlings.

### 392 Root Nuclei Isolation and single nuclei RNA-seq and ATAC-seq library constructions

393 To maximize the relevant of the transcriptomic information collected from plant isolated nuclei,  
394 we developed a methodology to isolate nuclei and process them for reverse transcription. The  
395 release of the plan nuclei is accomplished in no more than 5 minutes and exclusively occurs at

396 4°C to minimize RNA degradation, prevent nuclear membranes, and prevent transcriptional  
397 changes associated with the isolation process. As a comparison, 60 to 120 minutes incubation at  
398 room temperature to 25°C are required to digest the cell wall to release Arabidopsis root  
399 protoplasts [7-11]. Upon centrifugation, FANS, and estimation of the nucleate density, the nuclei  
400 are processed into the 10X Genomic Chromium System for the construction of the sNUC-  
401 RNAseq libraries in less than 90 minutes following the isolation of the plants from the Petri  
402 dishes.

403 To generate sNucRNA-seq libraries, Arabidopsis root nuclei were isolated by chopping the roots  
404 in 1 ml of Nuclear Isolation Buffer (CELLYTPN1-1KT, Sigma-Aldrich) and incubated for 15  
405 minutes on a rocking shaker at 4°C. The lysate was filtered through a 40µm cell strainer  
406 (Corning) and stained with propidium iodide (PI; 20 ug/ml, Alpha Aesar). Nuclei were sorted  
407 using FACS Aria™ II flow cytometer (BD, Flow Cytometry Service Center), pelleted (1,000g for  
408 10 minutes at 4°C), and resuspended in PBS buffer without calcium and magnesium and  
409 supplemented with Protector RNase inhibitor (0.2U/ul, Roche) and ultrapure BSA (0.1%,  
410 Invitrogen). Nuclei concentration was estimated using Countess II FL Automated Cell Counter  
411 (ThermoFisher) upon staining with trypan blue. The nuclei were used as an input to generate  
412 RNA-seq libraries following the 10X Genomics Chromium Single Cell 3' v3 protocol without  
413 modification.

414 To create single nuclei ATAC-seq libraries, the nuclei were isolated by chopping and filtration as  
415 described above. Triton X-100 (v/v) 0.5% final was added to the nuclei suspension to  
416 permeabilize the nuclei. The nuclei were then centrifuged 500g for 10 minutes, washed with PBS  
417 supplemented with BSA 0.1%, then pelleted again. Oppositely, to the population of nuclei used  
418 to establish sNucRNA-seq libraries, we did not stain with propidium iodide and sorted the nuclei

419 dedicated to sNucATAC-seq technology. Preliminary work conducted on Arabidopsis nuclei  
420 clearly highlighted that both staining and sorting decrease the number of unique fragments per  
421 barcode, affecting the resolution of the clusters of cells (data not shown). Upon isolation and  
422 filtration, the nuclei pellet was resuspended in the ATAC-seq nuclei buffer (10x Genomics  
423 #2000153). Nuclei concentration was estimated using the Countess II FL Automated Cell  
424 Counter (ThermoFisher). 6768 nuclei isolated from two independent replicates were used to  
425 generate sNucATAC-seq libraries following 10X Genomics Chromium Single Cell ATAC  
426 protocol without modification.

427 The sNucRNA-seq and sNucATAC-seq libraries were sequenced on an Illumina Hiseq platform.

#### 428 Bioinformatics analyses

429 *Sc/sNucRNA-seq*: ScRNA-seq data for the three wild-type replicates of previously published [9]  
430 data (SRA experiments SRX5074330-SRX5074332) and five sNucRNA-seq replicates from the  
431 current study (Supplemental Table 1) were processed individually using the 10x Genomics  
432 cellranger (v3.1.0) count pipeline, against a reference constructed from the TAIR10 genome and  
433 Araport11 annotations. The recommended protocol for reference construction in support of pre-  
434 mRNA capture for data derived from nuclear preparations was applied.

435 Following generation of the UMI count matrices, doublet filtering was performed on each  
436 individual dataset using 50 iterations of the BoostClassifier prediction method of  
437 DoubletDetection (p\_thresh=1e-7, voter\_thresh=0.8) [54]. Additionally, the published scRNA-  
438 seq data was filtered to include only those cells passing QC as performed in [9] by filtering on  
439 cell barcodes present for the WT replicates in the GEO dataset GSE123013. All datasets were  
440 filtered to include only called cells with more than 200 genes represented by at least one UMI.  
441 Normalization of individual datasets and their integration was performed using Seurat v3.1.5,

442 with genes required to be present in a minimum of 5 cells, and the top 2000 variable genes used  
443 for feature selection. Integration anchors were chosen for the combined set of 3 scRNA-seq and  
444 5 sNucRNA-seq replicates using the first 20 dimensions of the canonical correlation analysis  
445 method. Following integration, UMAP dimensionality reduction was performed on the first 20  
446 principal components, and clustering was performed using Seurat's FindClusters method with a  
447 resolution of 0.5. Expression values were obtained separately for the subsets of cells and nuclei  
448 belonging to each cluster using Seurat's AverageExpression method.

449 *sNucATAC-seq*: sNucATAC-seq data from 2 replicates were processed using the cellranger-atac  
450 (v1.2) count pipeline, with a reference constructed using TAIR10/Araport11 and  
451 JASPAR2018\_CORE\_plants\_non-redundant\_pfms. Counts against peaks called by cellranger-  
452 atac were read into Seurat objects and subset to include only cells with between 1k- 20k  
453 fragment counts in peak regions, and > %15 of the cell's fragments in peak regions and a  
454 calculated nucleosome\_signal of > 10. Integration of the two replicates was performed using the  
455 Harmony integration strategy [55] on the latent semantic indexing reduction performed by  
456 Signac (v0.2.5) [51], with UMAP dimensionality reduction performed on the resulting integrated  
457 dataset. Transcription start site (TSS) enrichment was analyzed per chromosome using the  
458 TSSEnrichment/TSSPlot functions of Signac.

459 *UMAP visualization*: In order to relate the structure of the UMAP plot for the combined  
460 sc/sNucRNA-seq datasets to that of the sNucATAC-seq data, a putative gene activity matrix was  
461 constructed from the aggregated fragments of the two replicates, using gene body coordinates  
462 extended 2kb upstream of the transcription start site. Log normalization was performed on the  
463 activity matrix, then the Seurat FindTransferAnchors method was used with the sNucATAC-seq  
464 data as query against the combined RNA-seq data as reference. Finally, cluster assignments were

465 made on the sNucATAC-seq using the TransferData method and the integration anchors  
466 determined earlier. These cluster assignments were used for subsequent extraction of averaged  
467 fragment counts across all cells assigned to the cluster, using Seurat AverageExpression on the  
468 peaks.

469 For visualization purposes, data from all RNA-seq data were combined using cellranger  
470 aggregate method to produce a combined cloupe file, with UMAP coordinates and cluster  
471 assignments imported from the Seurat analysis. Similarly, the two sNucATAC-seq replicates  
472 were combined using cellranger-atac aggregated, and UMAP coordinates and cluster  
473 assignments from the Harmony/Signac analysis were imported into the cloupe rendering.

474 *Correlation analyses:* Correlation analyses were performed by matching called peaks from the  
475 ATAC-seq data to genes by looking for any overlap of peak regions with genes using bedtools  
476 (v2.29.2) [56], then applying a custom script to choose among overlapped genes based on the  
477 maximum extension of the peak region into the 5' upstream region. Correlation was performed  
478 between matrices constructed from normalized average expression values for genes and average  
479 fragment count values for peaks, with the corresponding rows in the two matrices representing  
480 matched gene and peak entities. The normalization procedure was done on values in each row  
481 independently, by considering each cluster in terms of its percentage representation of the  
482 expression/fragment count for the gene/peak across all clusters, in order to represent specificity  
483 independent of magnitude of expression/fragment count. These normalized values were  
484 considered as mapping onto twenty quantiles, roughly corresponding to the number of clusters in  
485 the analysis. Thus, a gene with perfect specificity would be mapped into the highest quantile for  
486 its cluster context of expression and into the lowest quantile for all other clusters, while a gene  
487 expressed approximately equally across all clusters would be mapped into the next-to-least

488 quantile for each cluster. The R cor function with method="kendall" (implementing the Kendall  
489 tau-b method for rank-based correlation in the presence of tied ranks) was used to produce  
490 correlation matrices, which were visualized as correlograms from the corrplot package [57].

491

## 492 **Data Availability**

493 Expression data are available at the Gene Expression Omnibus (GEO number: pending).

494

## 495 **Acknowledgements**

496 This work was supported by a grant to M.L. from the U.S. National Science Foundation (IOS#  
497 1854326), by grants to J.S. from the U.S. National Science Foundation (IOS#1923589) and the  
498 Department of Energy (DE-SC0020358), by the Center for Plant Science Innovation, and by the  
499 Department of Agronomy and Horticulture at the University of Nebraska-Lincoln. The authors  
500 would like to acknowledge Dirk Anderson, manager of the Flow Cytometry Core facility, and  
501 the Nebraska Center for Biotechnology at the University of Nebraska-Lincoln, for providing  
502 support in the sorting of the isolated nuclei. Additionally, the authors want to thank Dr. Jeffrey  
503 Doyle, from Cornell University for his constructive comments and feedback on the manuscript.

504

## 505 **Author Contributions**

506 S.T. and K.H.R. performed experiments. A.D.F., S.C., K.H.R., J.S., and M.L. carried out data  
507 analysis. M.L. oversaw the study. All authors contributed to the preparation of the manuscript.

508

509 **References**

- 510 1. Gulko, B. and A. Siepel, *An evolutionary framework for measuring epigenomic*  
511 *information and estimating cell-type-specific fitness consequences*. Nat Genet, 2019.  
512 **51**(2): p. 335-342.
- 513 2. Pott, S. and J.D. Lieb, *Single-cell ATAC-seq: strength in numbers*. Genome Biol, 2015.  
514 **16**: p. 172.
- 515 3. Buenrostro, J.D., et al., *Integrated Single-Cell Analysis Maps the Continuous Regulatory*  
516 *Landscape of Human Hematopoietic Differentiation*. Cell, 2018. **173**(6): p. 1535-1548  
517 e16.
- 518 4. Buenrostro, J.D., et al., *Single-cell chromatin accessibility reveals principles of*  
519 *regulatory variation*. Nature, 2015. **523**(7561): p. 486-90.
- 520 5. Norrie, J.L., et al., *Nucleome Dynamics during Retinal Development*. Neuron, 2019.  
521 **104**(3): p. 512-528 e11.
- 522 6. Zhou, W., et al., *Global prediction of chromatin accessibility using small-cell-number*  
523 *and single-cell RNA-seq*. Nucleic Acids Res, 2019. **47**(19): p. e121.
- 524 7. Denyer, T., et al., *Spatiotemporal Developmental Trajectories in the Arabidopsis Root*  
525 *Revealed Using High-Throughput Single-Cell RNA Sequencing*. Dev Cell, 2019. **48**(6): p.  
526 840-852 e5.
- 527 8. Jean-Baptiste, K., et al., *Dynamics of Gene Expression in Single Root Cells of*  
528 *Arabidopsis thaliana*. Plant Cell, 2019. **31**(5): p. 993-1011.
- 529 9. Ryu, K.H., et al., *Single-Cell RNA Sequencing Resolves Molecular Relationships Among*  
530 *Individual Plant Cells*. Plant Physiol, 2019. **179**(4): p. 1444-1456.
- 531 10. Shulse, C.N., et al., *High-Throughput Single-Cell Transcriptome Profiling of Plant Cell*  
532 *Types*. Cell Rep, 2019. **27**(7): p. 2241-2247 e4.

- 533 11. Zhang, T.Q., et al., *A Single-Cell RNA Sequencing Profiles the Developmental Landscape*  
534 *of Arabidopsis Root*. Mol Plant, 2019. **12**(5): p. 648-660.
- 535 12. Sarkar, P., E. Bosneaga, and M. Auer, *Plant cell walls throughout evolution: towards a*  
536 *molecular understanding of their design principles*. Journal of Experimental Botany,  
537 2009. **60**(13): p. 3615-3635.
- 538 13. Somssich, M., G.A. Khan, and S. Persson, *Cell Wall Heterogeneity in Root Development*  
539 *of Arabidopsis*. Front Plant Sci, 2016. **7**: p. 1242.
- 540 14. Reynoso, M.A., et al., *Nuclear Transcriptomes at High Resolution Using Retooled*  
541 *INTACT*. Plant Physiology, 2018. **176**(1): p. 270-281.
- 542 15. Palovaara, J. and D. Weijers, *Adapting INTACT to analyse cell-type-specific*  
543 *transcriptomes and nucleocytoplasmic mRNA dynamics in the Arabidopsis embryo*. Plant  
544 Reproduction, 2019. **32**(1): p. 113-121.
- 545 16. Del Toro-De Leon, G. and C. Kohler, *Endosperm-specific transcriptome analysis by*  
546 *applying the INTACT system*. Plant Reproduction, 2019. **32**(1): p. 55-61.
- 547 17. Pirrello, J., et al., *Transcriptome profiling of sorted endoreduplicated nuclei from tomato*  
548 *fruits: how the global shift in expression ascribed to DNA ploidy influences RNA-Seq*  
549 *data normalization and interpretation*. Plant Journal, 2018. **93**(2): p. 387-398.
- 550 18. Bakken, T.E., et al., *Single-nucleus and single-cell transcriptomes compared in matched*  
551 *cortical cell types*. PLoS One, 2018. **13**(12): p. e0209648.
- 552 19. Hu, P., et al., *Single-nucleus transcriptomic survey of cell diversity and functional*  
553 *maturation in postnatal mammalian hearts*. Genes Dev, 2018. **32**(19-20): p. 1344-1357.
- 554 20. Schwanhauser, B., et al., *Global quantification of mammalian gene expression control*.  
555 Nature, 2011. **473**(7347): p. 337-42.



- 556 21. Birnbaum, K., et al., *A gene expression map of the Arabidopsis root*. Science, 2003.  
557 **302**(5652): p. 1956-60.
- 558 22. Butler, A., et al., *Integrating single-cell transcriptomic data across different conditions,*  
559 *technologies, and species*. Nature Biotechnology, 2018. **36**(5): p. 411-+.
- 560 23. Stuart, T., et al., *Comprehensive Integration of Single-Cell Data*. Cell, 2019. **177**(7): p.  
561 1888-+.
- 562 24. Becht, E., et al., *Dimensionality reduction for visualizing single-cell data using UMAP*.  
563 Nature Biotechnology, 2019. **37**(1): p. 38-+.
- 564 25. Bohme, K., et al., *The Arabidopsis COW1 gene encodes a phosphatidylinositol transfer*  
565 *protein essential for root hair tip growth*. Plant J, 2004. **40**(5): p. 686-98.
- 566 26. Fendrych, M., et al., *Programmed cell death controlled by ANAC033/SOMBRERO*  
567 *determines root cap organ size in Arabidopsis*. Curr Biol, 2014. **24**(9): p. 931-40.
- 568 27. Olvera-Carrillo, Y., et al., *A Conserved Core of Programmed Cell Death Indicator Genes*  
569 *Discriminates Developmentally and Environmentally Induced Programmed Cell Death in*  
570 *Plants*. Plant Physiol, 2015. **169**(4): p. 2684-99.
- 571 28. Turco, G.M., et al., *Molecular Mechanisms Driving Switch Behavior in Xylem Cell*  
572 *Differentiation*. Cell Rep, 2019. **28**(2): p. 342-351 e4.
- 573 29. Lai, C.P., et al., *Genome-wide analysis of GDSL-type esterases/lipases in Arabidopsis*.  
574 Plant Mol Biol, 2017. **95**(1-2): p. 181-197.
- 575 30. Park, J.J., et al., *Mutation in Wilted Dwarf and Lethal 1 (WDL1) causes abnormal cuticle*  
576 *formation and rapid water loss in rice*. Plant Mol Biol, 2010. **74**(1-2): p. 91-103.
- 577 31. Girard, A.L., et al., *Tomato GDSL1 Is Required for Cutin Deposition in the Fruit Cuticle*.  
578 Plant Cell, 2012. **24**(7): p. 3119-3134.

- 579 32. Ding, L.N., et al., *Advances in plant GDSL lipases: from sequences to functional*  
580 *mechanisms*. Acta Physiologiae Plantarum, 2019. **41**(9).
- 581 33. Tsukagoshi, H., W. Busch, and P.N. Benfey, *Transcriptional regulation of ROS controls*  
582 *transition from proliferation to differentiation in the root*. Cell, 2010. **143**(4): p. 606-16.
- 583 34. Dominguez, E., J.A. Heredia-Guerrero, and A. Heredia, *Plant cutin genesis: unanswered*  
584 *questions*. Trends Plant Sci, 2015. **20**(9): p. 551-8.
- 585 35. Beisson, F., et al., *The acyltransferase GPAT5 is required for the synthesis of suberin in*  
586 *seed coat and root of Arabidopsis*. Plant Cell, 2007. **19**(1): p. 351-68.
- 587 36. Li, Y., et al., *Monoacylglycerols are components of root waxes and can be produced in*  
588 *the aerial cuticle by ectopic expression of a suberin-associated acyltransferase*. Plant  
589 Physiol, 2007. **144**(3): p. 1267-77.
- 590 37. Li, Y., et al., *Identification of acyltransferases required for cutin biosynthesis and*  
591 *production of cutin with suberin-like monomers*. Proc Natl Acad Sci U S A, 2007.  
592 **104**(46): p. 18339-44.
- 593 38. Berhin, A., et al., *The Root Cap Cuticle: A Cell Wall Structure for Seedling*  
594 *Establishment and Lateral Root Formation*. Cell, 2019. **176**(6): p. 1367-1378 e8.
- 595 39. Gao, Z., et al., *KIR1 and ORESARA1 terminate flower receptivity by promoting cell*  
596 *death in the stigma of Arabidopsis*. Nat Plants, 2018. **4**(6): p. 365-375.
- 597 40. Heo, J.O., B. Blob, and Y. Helariutta, *Differentiation of conductive cells: a matter of life*  
598 *and death*. Curr Opin Plant Biol, 2017. **35**: p. 23-29.
- 599 41. Kumpf, R.P. and M.K. Nowack, *The root cap: a short story of life and death*. J Exp Bot,  
600 2015. **66**(19): p. 5651-62.
- 601 42. Kwak, S.H., R. Shen, and J. Schiefelbein, *Positional signaling mediated by a receptor-*  
602 *like kinase in Arabidopsis*. Science, 2005. **307**(5712): p. 1111-3.

- 603 43. Salazar-Henao, J.E., I.C. Velez-Bermudez, and W. Schmidt, *The regulation and plasticity*  
604 *of root hair patterning and morphogenesis*. Development, 2016. **143**(11): p. 1848-58.
- 605 44. Chen, C.Y. and W. Schmidt, *The paralogous R3 MYB proteins CAPRICE,*  
606 *TRIPTYCHON and ENHANCER OF TRY AND CPC1 play pleiotropic and partly non-*  
607 *redundant roles in the phosphate starvation response of Arabidopsis roots*. J Exp Bot,  
608 2015. **66**(15): p. 4821-34.
- 609 45. Maher, K.A., et al., *Profiling of Accessible Chromatin Regions across Multiple Plant*  
610 *Species and Cell Types Reveals Common Gene Regulatory Principles and New Control*  
611 *Modules*. Plant Cell, 2018. **30**(1): p. 15-36.
- 612 46. Sijacic, P., et al., *Changes in chromatin accessibility between Arabidopsis stem cells and*  
613 *mesophyll cells illuminate cell type-specific transcription factor networks*. Plant Journal,  
614 2018. **94**(2): p. 215-231.
- 615 47. Lai, B., et al., *Principles of nucleosome organization revealed by single-cell micrococcal*  
616 *nuclease sequencing*. Nature, 2018. **562**(7726): p. 281-285.
- 617 48. Arendt, D., et al., *Evolution of neuronal types and families*. Curr Opin Neurobiol, 2019.  
618 **56**: p. 144-152.
- 619 49. Lu, Z., et al., *Combining ATAC-seq with nuclei sorting for discovery of cis-regulatory*  
620 *regions in plant genomes*. Nucleic Acids Res, 2017. **45**(6): p. e41.
- 621 50. Tannenbaum, M., et al., *Regulatory chromatin landscape in Arabidopsis thaliana roots*  
622 *uncovered by coupling INTACT and ATAC-seq*. Plant Methods, 2018. **14**: p. 113.
- 623 51. Stuart, T., et al., *Comprehensive Integration of Single-Cell Data*. Cell, 2019. **177**(7): p.  
624 1888-1902 e21.

- 625 52. Preissl, S., et al., *Single-nucleus analysis of accessible chromatin in developing mouse*  
626 *forebrain reveals cell-type-specific transcriptional regulation*. Nat Neurosci, 2018. **21**(3):  
627 p. 432-439.
- 628 53. Sinnamon, J.R., et al., *The accessible chromatin landscape of the murine hippocampus at*  
629 *single-cell resolution*. Genome Research, 2019. **29**(5): p. 857-869.
- 630 54. Gayoso, A.; Shor, J.; Carr, A.J.; Sharma, R.; Pe'er, D. . *DoubletDetection (Version v2.4)*.  
631 2018; Available from: <http://doi.org/10.5281/zenodo.2678041>.
- 632 55. Korsunsky, I., et al., *Fast, sensitive and accurate integration of single-cell data with*  
633 *Harmony*. Nat Methods, 2019. **16**(12): p. 1289-1296.
- 634 56. Quinlan, A.R. and I.M. Hall, *BEDTools: a flexible suite of utilities for comparing*  
635 *genomic features*. Bioinformatics, 2010. **26**(6): p. 841-2.
- 636 57. Wei, T. and V. Simko, *R package "corrplot": Visualization of a Correlation Matrix*  
637 *(Version 0.84)*. 2017; Available from: <https://github.com/taiyun/corrplot>.

638

## 639 **Legends**

640 **Figure 1.** UMAP Cluster analysis of the Arabidopsis single-cell and single-nucleus  
641 transcriptomes. **A.** Comparative analysis of the clustering of Arabidopsis cells (left, [9]) and  
642 nuclei (right, present study) according to their transcriptomic profiles. Red circles highlight the  
643 clusters that are mostly or exclusively revealed using sNucRNA-seq technology. **B.** Percentage  
644 of Arabidopsis genes found expressed upon analysis of sNucRNA-seq (blue) and scRNA-seq  
645 (red) technologies for each 21 clusters. The numbers at the top of the bars highlight the number  
646 of nuclei and cells associated to each cluster.

647 **Figure 2. A.** Assignment of Arabidopsis root cell-types based on the characterization of the  
648 expression profile of cell-type and cell death marker genes. **B.** Normalized expression level of  
649 103 cell-type and cell death marker genes (x-axis, see Supplemental Table 2) across the 21  
650 different clusters (y-axis). sNuc-RNAseq dataset were used to create this figure. The diameter of  
651 each circle reflects the relative expression of the genes in each cell cluster. As a comparison, the  
652 transcriptional activity of these genes in Arabidopsis protoplasts [9] is provided in Supplemental  
653 Figure 4.

654 **Figure 3.** Use of sNucATAC-seq technology to characterize the differential folding of the  
655 chromatin fiber between Arabidopsis root cell types. **A.** Distribution of accessible regions of the  
656 chromatin fiber located around the TSS of the genes on the 5 Arabidopsis chromosomes after  
657 applying sNucATAC-seq technology. **B.** Clustering of Arabidopsis root nuclei upon  
658 sNucATAC-seq analysis. The numerical annotation of these clusters is the same as for the  
659 sNucRNA-seq clusters (Figure 2A). Taking advantage of the integrative sNucATAC-seq and  
660 sc/sNucRNA-seq analysis, we functionally assigned each of the 21 sNucATAC-seq Arabidopsis  
661 root clusters. **C.** Comparative analysis of the distribution of ATAC-seq peaks on the *A. thaliana*  
662 chromosome 1: 21,067,500–21,103,000. The top blue graphic was generated from a bulk ATAC-  
663 seq analysis of the Arabidopsis root seedling [55]. Below is indicated the ATAC-seq peak  
664 profiles across the 21 sNucATAC-seq clusters. The red arrows highlight cluster-specific  
665 sNucATAC-seq peaks.

666 **Figure 4.** Correlation analyses between gene expression and chromatin accessibility of 337  
667 marker genes for each of the 20 and 21 sc (**A**) and sNucRNA-seq clusters (**B**). For each  
668 correlation analysis, a Kendall tau-b correlation score was calculated based on the ranking of the  
669 cluster according to the expression level of the gene and the level of accessibility of the

670 chromatin fiber (see pies). When significant ( $p$ -value  $< 0.01$ ), positive and negative correlations  
671 are highlighted in blue or red, respectively. Co-annotated sc/sNucRNA-seq and sNucATAC-seq  
672 are highlighted in a dark purple box located in the diagonal of each figure. Positive and negative  
673 correlation between clusters that belong to super-clusters (i.e., stele, endodermis, cortical cells,  
674 quiescent cells, atrichoblasts and trichoblasts) are highlighted in green and red boxes,  
675 respectively. Other noticeable significant correlations are highlighted in black boxes.

676 **Figure 5.** Normalized expression level of 63 Arabidopsis genes (x-axis) characterized by their  
677 higher accessibility of their TSS in the root hair clusters #6, 10, and 13 (Figure 4B). Gene  
678 expression levels were quantified by using scRNA-seq (A) and sNucRNA-seq (B). The diameter  
679 of each circle reflects the relative expression of the genes in each cell cluster (y-axis). Genes  
680 highlighted in red are not considered as root-hair specific based on their transcriptional patterns.  
681 Those highlighted in blue are not found expressed according to the sc (A) and sNucRNA-seq  
682 datasets (B).

683 **Supplemental Figure 1.** Schematic representation of the isolation of Arabidopsis root nuclei and  
684 their use to create sNucRNA-seq and sNucATAC-seq libraries.

685 **Supplemental Figure 2.** Percentage of the predicted Arabidopsis protein-coding genes found  
686 expressed or unexpressed by using sNucRNA-seq and scRNA-seq technologies. These  
687 percentages are provided for each of the 21 clusters described in Figure 1A and B. As a note, the  
688 transcriptomes of three clusters (clusters #16, 19, and 20) almost exclusively rely on the use of  
689 sNucRNA-seq technology.

690 **Supplemental Figure 3.** Venn diagrams showing the number of expressed and non-expressed  
691 genes revealed upon applying sNucRNA-seq and scRNA-seq technologies. Not including

692 clusters #16, 19 and 20, 80.2% of the expressed genes were identified by both technologies in  
693 average.

694 **Supplemental Figure 4.** Normalized expression level of 103 cell-type marker genes (x-axis)  
695 across the 21 different clusters (y-axis). scRNA-seq dataset mined from Ryu et al., 2019 [9] were  
696 used to create this figure. The diameter of each circle reflects the relative expression of the genes  
697 in each cell cluster.

698 **Supplemental Figure 5.** Transcriptional patterns at the single cell level of Arabidopsis genes  
699 preferentially expressed in cluster #16. The relative levels of expression of the genes are  
700 highlighted in yellow/red color. Red and blue circles highlight the expression of endodermal and  
701 cortical marker genes. Blue arrows highlight the expression of gene encoding peroxydases,  
702 GDSL-motif esterases/acyltransferases/lipases and proteins involved in the biosynthesis of  
703 suberin and cutin. Black arrows highlight the absence of transcriptional activity of the *UPBEATI*  
704 gene in the clusters # 10, 16, 19 and 20.

705 **Supplemental Figure 6.** Transcriptional patterns of the Arabidopsis *CEP1* (AT5G50260), *EXII*  
706 (AT2G14095), and *KIRAI* (AT4G28530) genes in isolated Arabidopsis nuclei (B). These genes  
707 control the cell death program notably in the root cap. The expression profile of two  $\alpha/\beta$   
708 hydrolases potentially involved in suberin/cutin biosynthesis is also highlighted. The relative  
709 levels of expression of the genes are highlighted in yellow/red color.

710 **Supplemental Figure 7.** Transcriptional patterns of the Arabidopsis  
711 *SCRAMBLED/STRUBBELIG* (SCM, AT1G11130) gene, two *NPF6.4/NRT1.3* genes, and couple  
712 additional marker genes of this cluster playing a role in root hair cell differentiation. The relative  
713 levels of expression of the genes in isolated Arabidopsis nuclei are highlighted in yellow/red  
714 color. SCM was mostly expressed in cluster #20, a cell cluster exclusively identified by applying

715 sNucRNA-seq technology. In protoplast, the expression levels of these genes are limited to few  
716 cells.

717 **Supplemental Figure 8.** Comparative analysis of the expression profile and chromatin folding  
718 of selected Arabidopsis genes. The left panels highlight the transcriptional activity of selected  
719 genes according to sc/sNucRNA-seq datasets (the relative levels of expression of the genes are  
720 highlighted in yellow/red color). When relevant, green arrows highlight the clusters where a gene  
721 was specifically expressed. The cluster number is indicated for information near to the arrow  
722 (see Figure 2A for the annotation of the 21 clusters). The right panels highlight the presence of  
723 sNucATAC-seq peaks nearby the TSS of the selected genes. The sc/sNucRNA-seq and  
724 sNucATAC-seq clusters are co-annotated to facilitate the comparative analysis. Green boxes and  
725 circles highlight major sNucATAC-seq peaks. Regarding At5g65590, a gene not expressed in  
726 any root cell type, the red box highlights the lack of open chromatin across the 21 sNucATAC-  
727 seq clusters.

728 **Supplemental Figure 9.** Correlation analyses between gene expression and chromatin  
729 accessibility of 628 housekeeping genes for each of the 20 and 21 sc (A) and sNucRNA-seq  
730 clusters (B). For each correlation analysis, a Kendall tau-b correlation score was calculated based  
731 on the ranking of the cluster according to the expression level of the gene and the level of  
732 accessibility of the chromatin fiber (see pies). When significant (p-value < 0.01), positive and  
733 negative correlations are highlighted in blue or red, respectively.

734 **Supplemental Table 1.** Summary of the sequencing of the different single cell and sNucRNA-  
735 seq libraries.

736 **Supplemental Table 2.** List of Arabidopsis root cell-type marker genes.



737 **Supplemental Table 3.** Expression level and relative accessibility of the chromatin of 337

738 Arabidopsis root cell-type marker genes.

739 **Supplemental Table 4.** Expression level and relative accessibility of the chromatin of 628

740 Arabidopsis root housekeeping genes.

741 **Supplemental Table 5.** Expression level and relative accessibility of the chromatin of 63

742 Arabidopsis genes associated with root hair-preferential sNucATAC-seq peaks in their TSS.

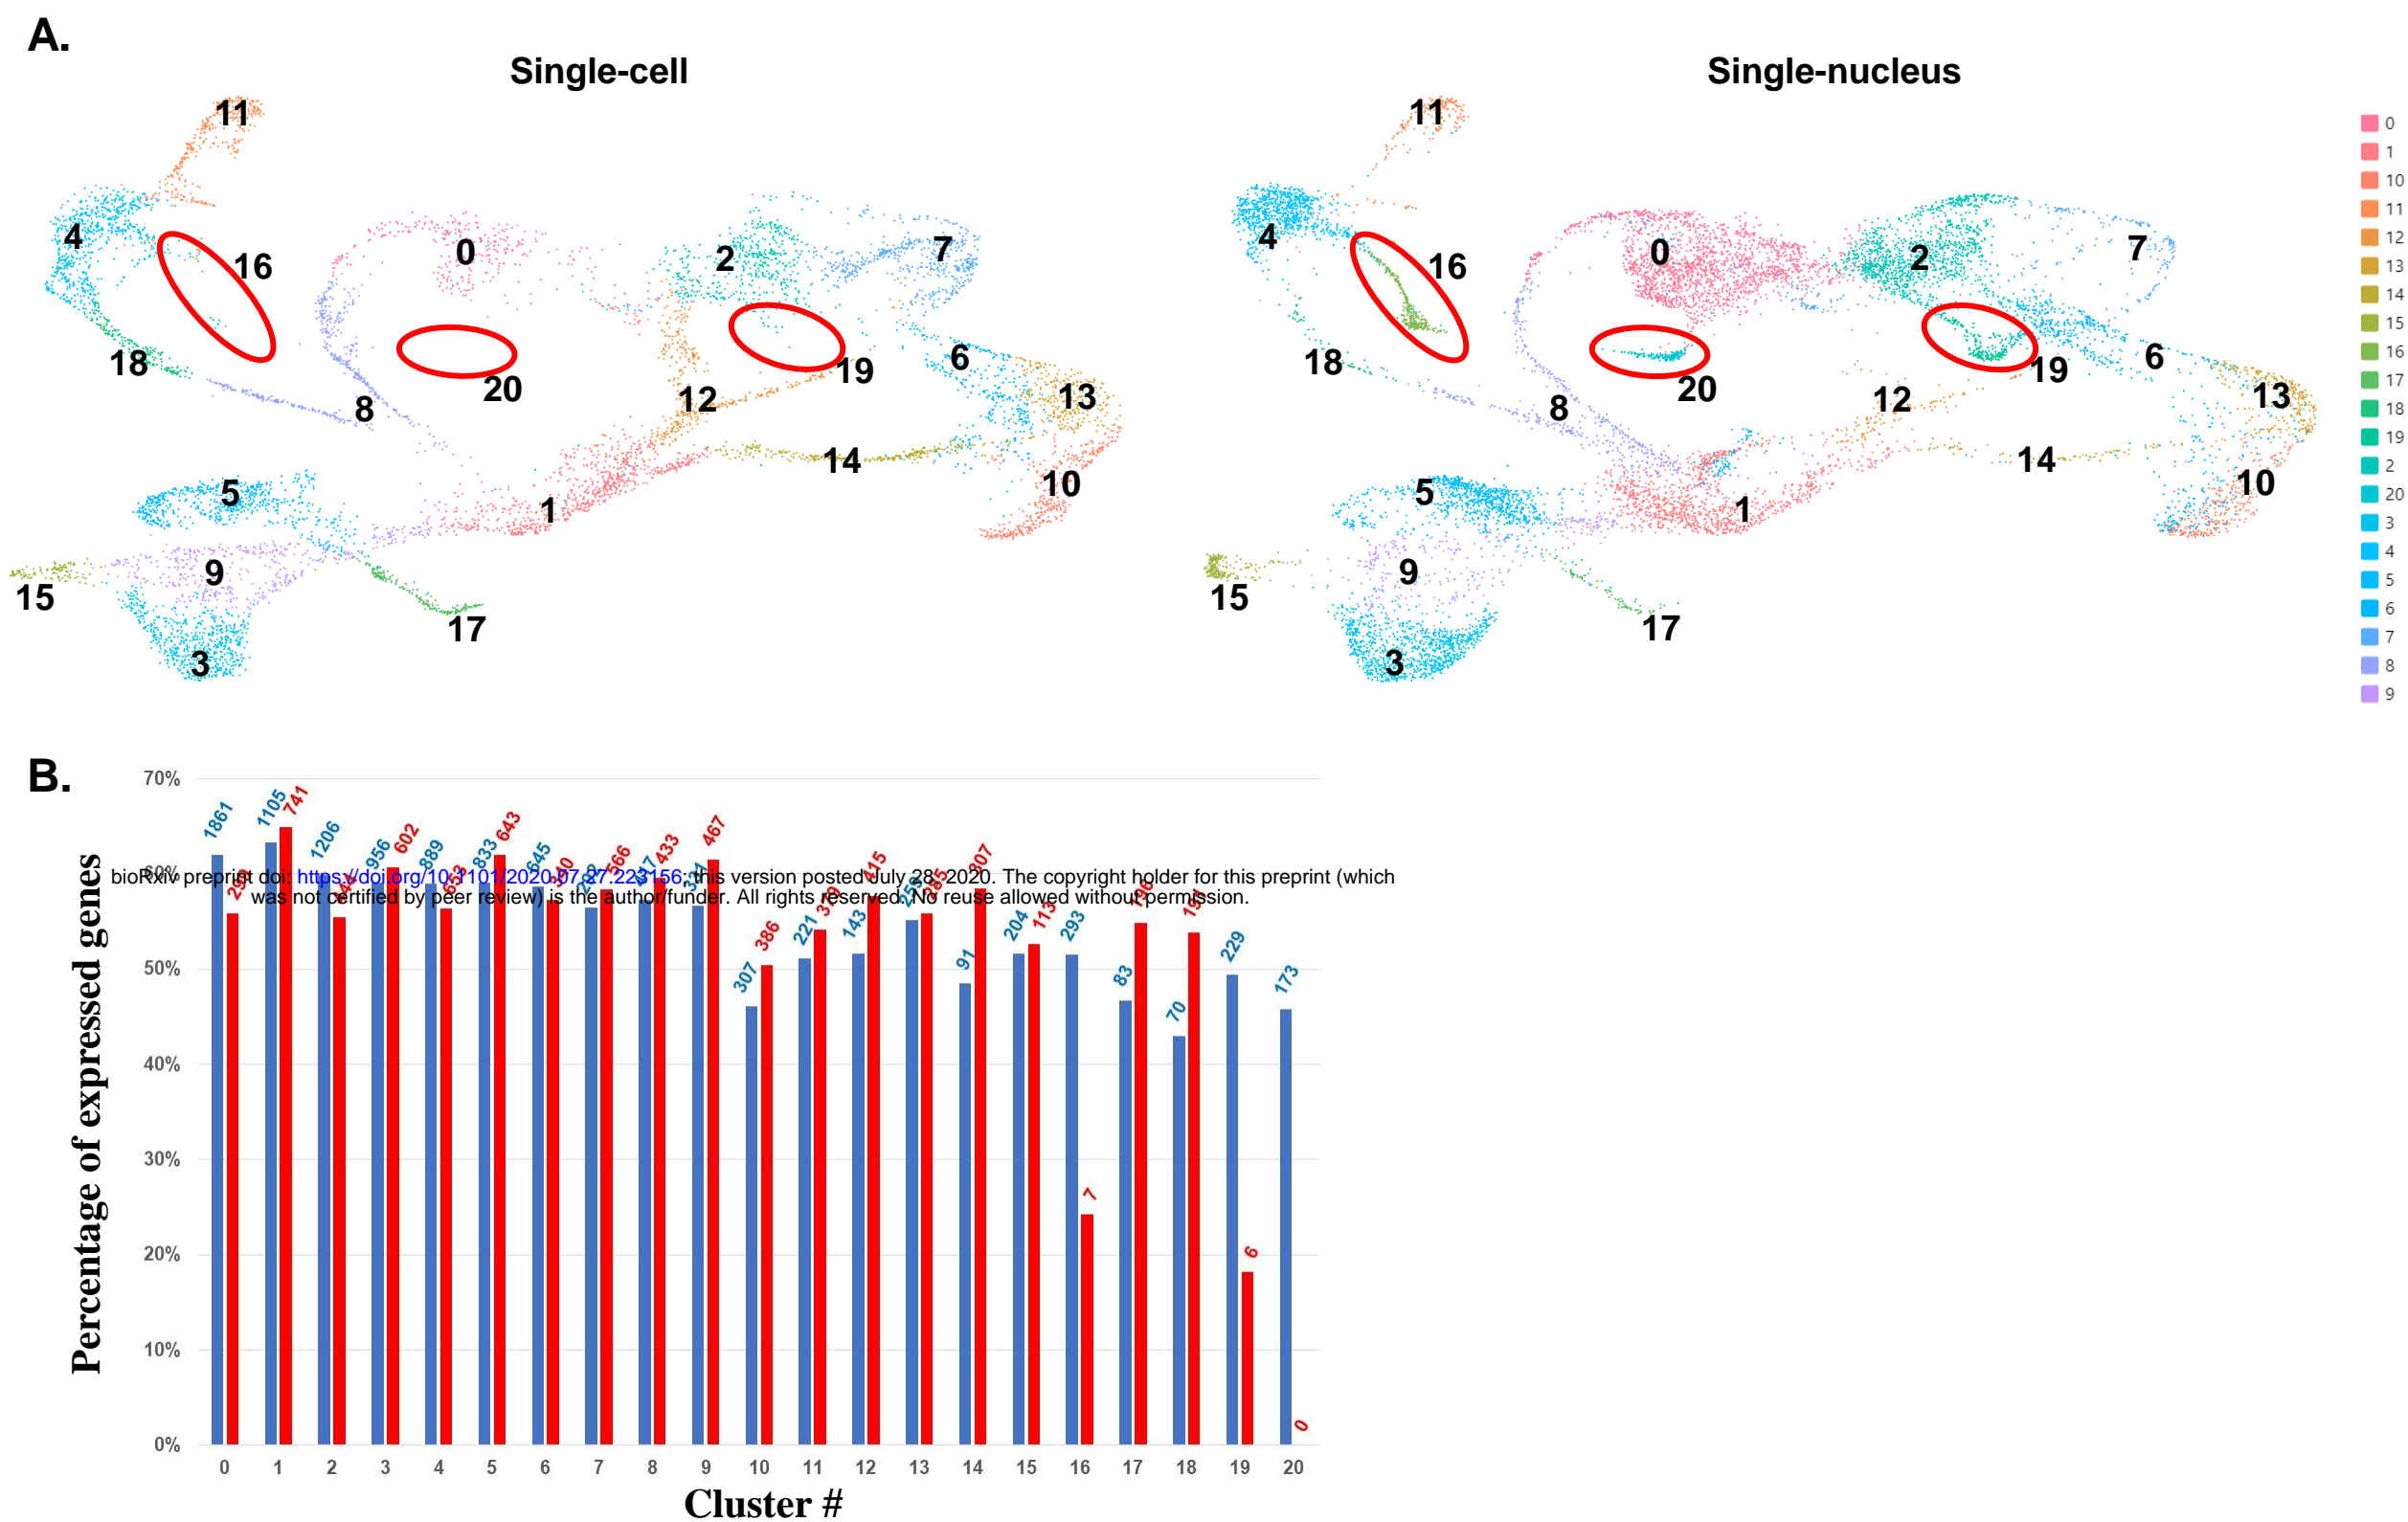

**Figure 1.** UMAP Cluster analysis of the Arabidopsis single-cell and single-nucleus transcriptomes. **A.** Comparative analysis of the clustering of Arabidopsis cells (left, [9]) and nuclei (right, present study) according to their transcriptomic profiles. Red circles highlight the clusters that are mostly or exclusively revealed using sNucRNA-seq technology. **B.** Percentage of Arabidopsis genes found expressed upon analysis of sNucRNA-seq (blue) and scRNA-seq (red) technologies for each 21 clusters. The numbers at the top of the bars highlight the number of nuclei and cells associated to each cluster.

**A.**

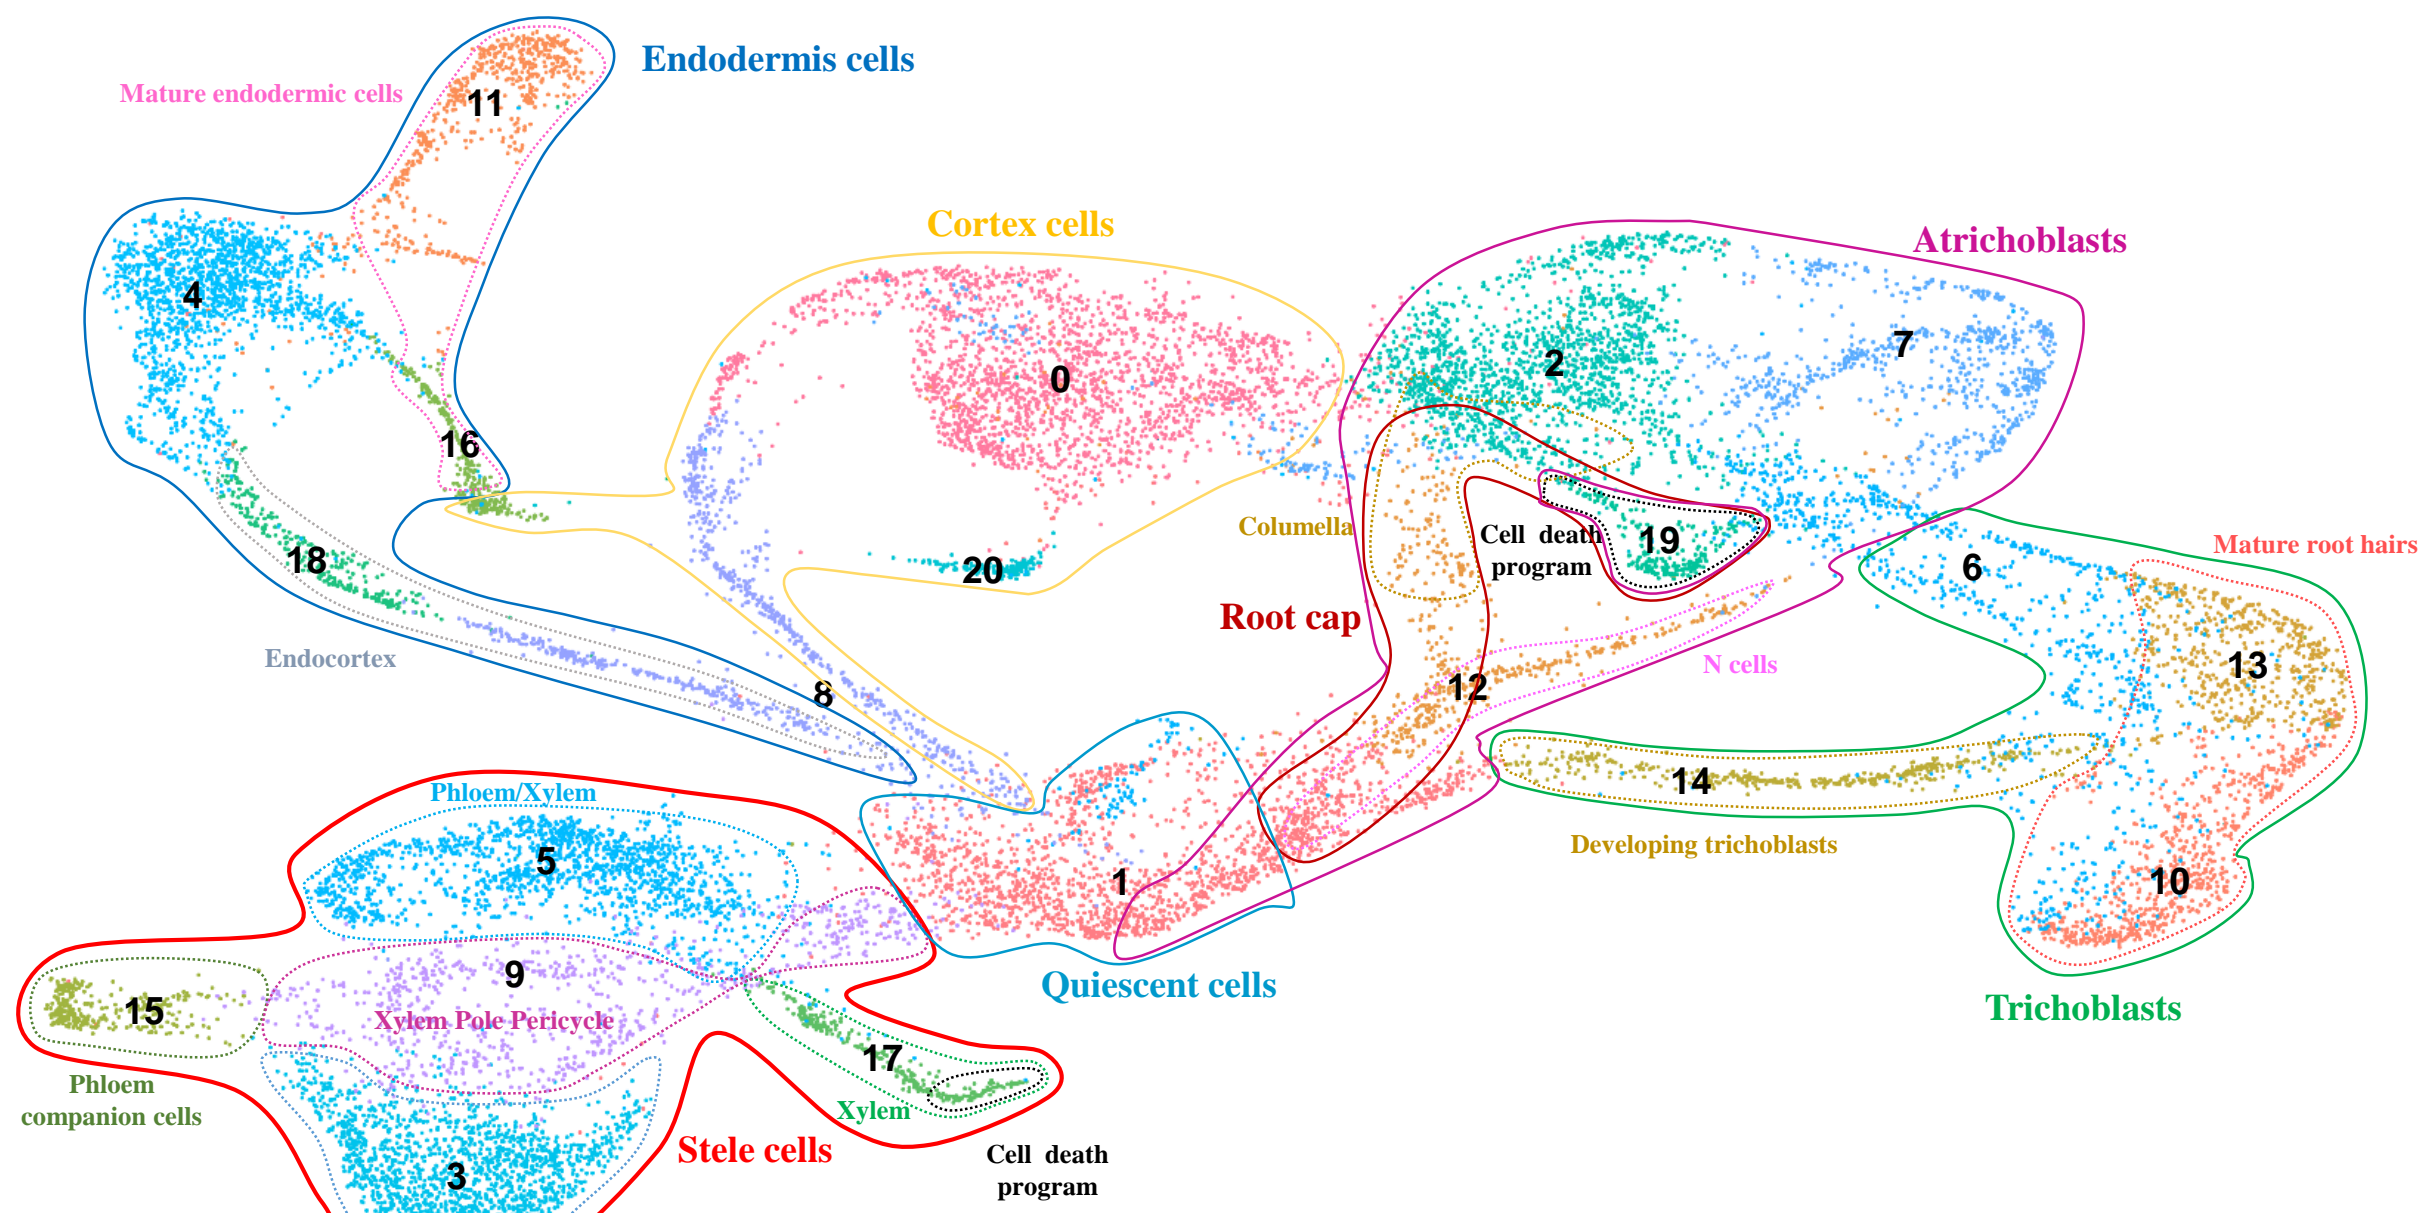

bioRxiv preprint doi: <https://doi.org/10.1101/2020.07.27.223156>; this version posted July 28, 2020. The copyright holder for this preprint (which was not certified by peer review) is the author/funder. All rights reserved. No reuse allowed without permission.

**B.**

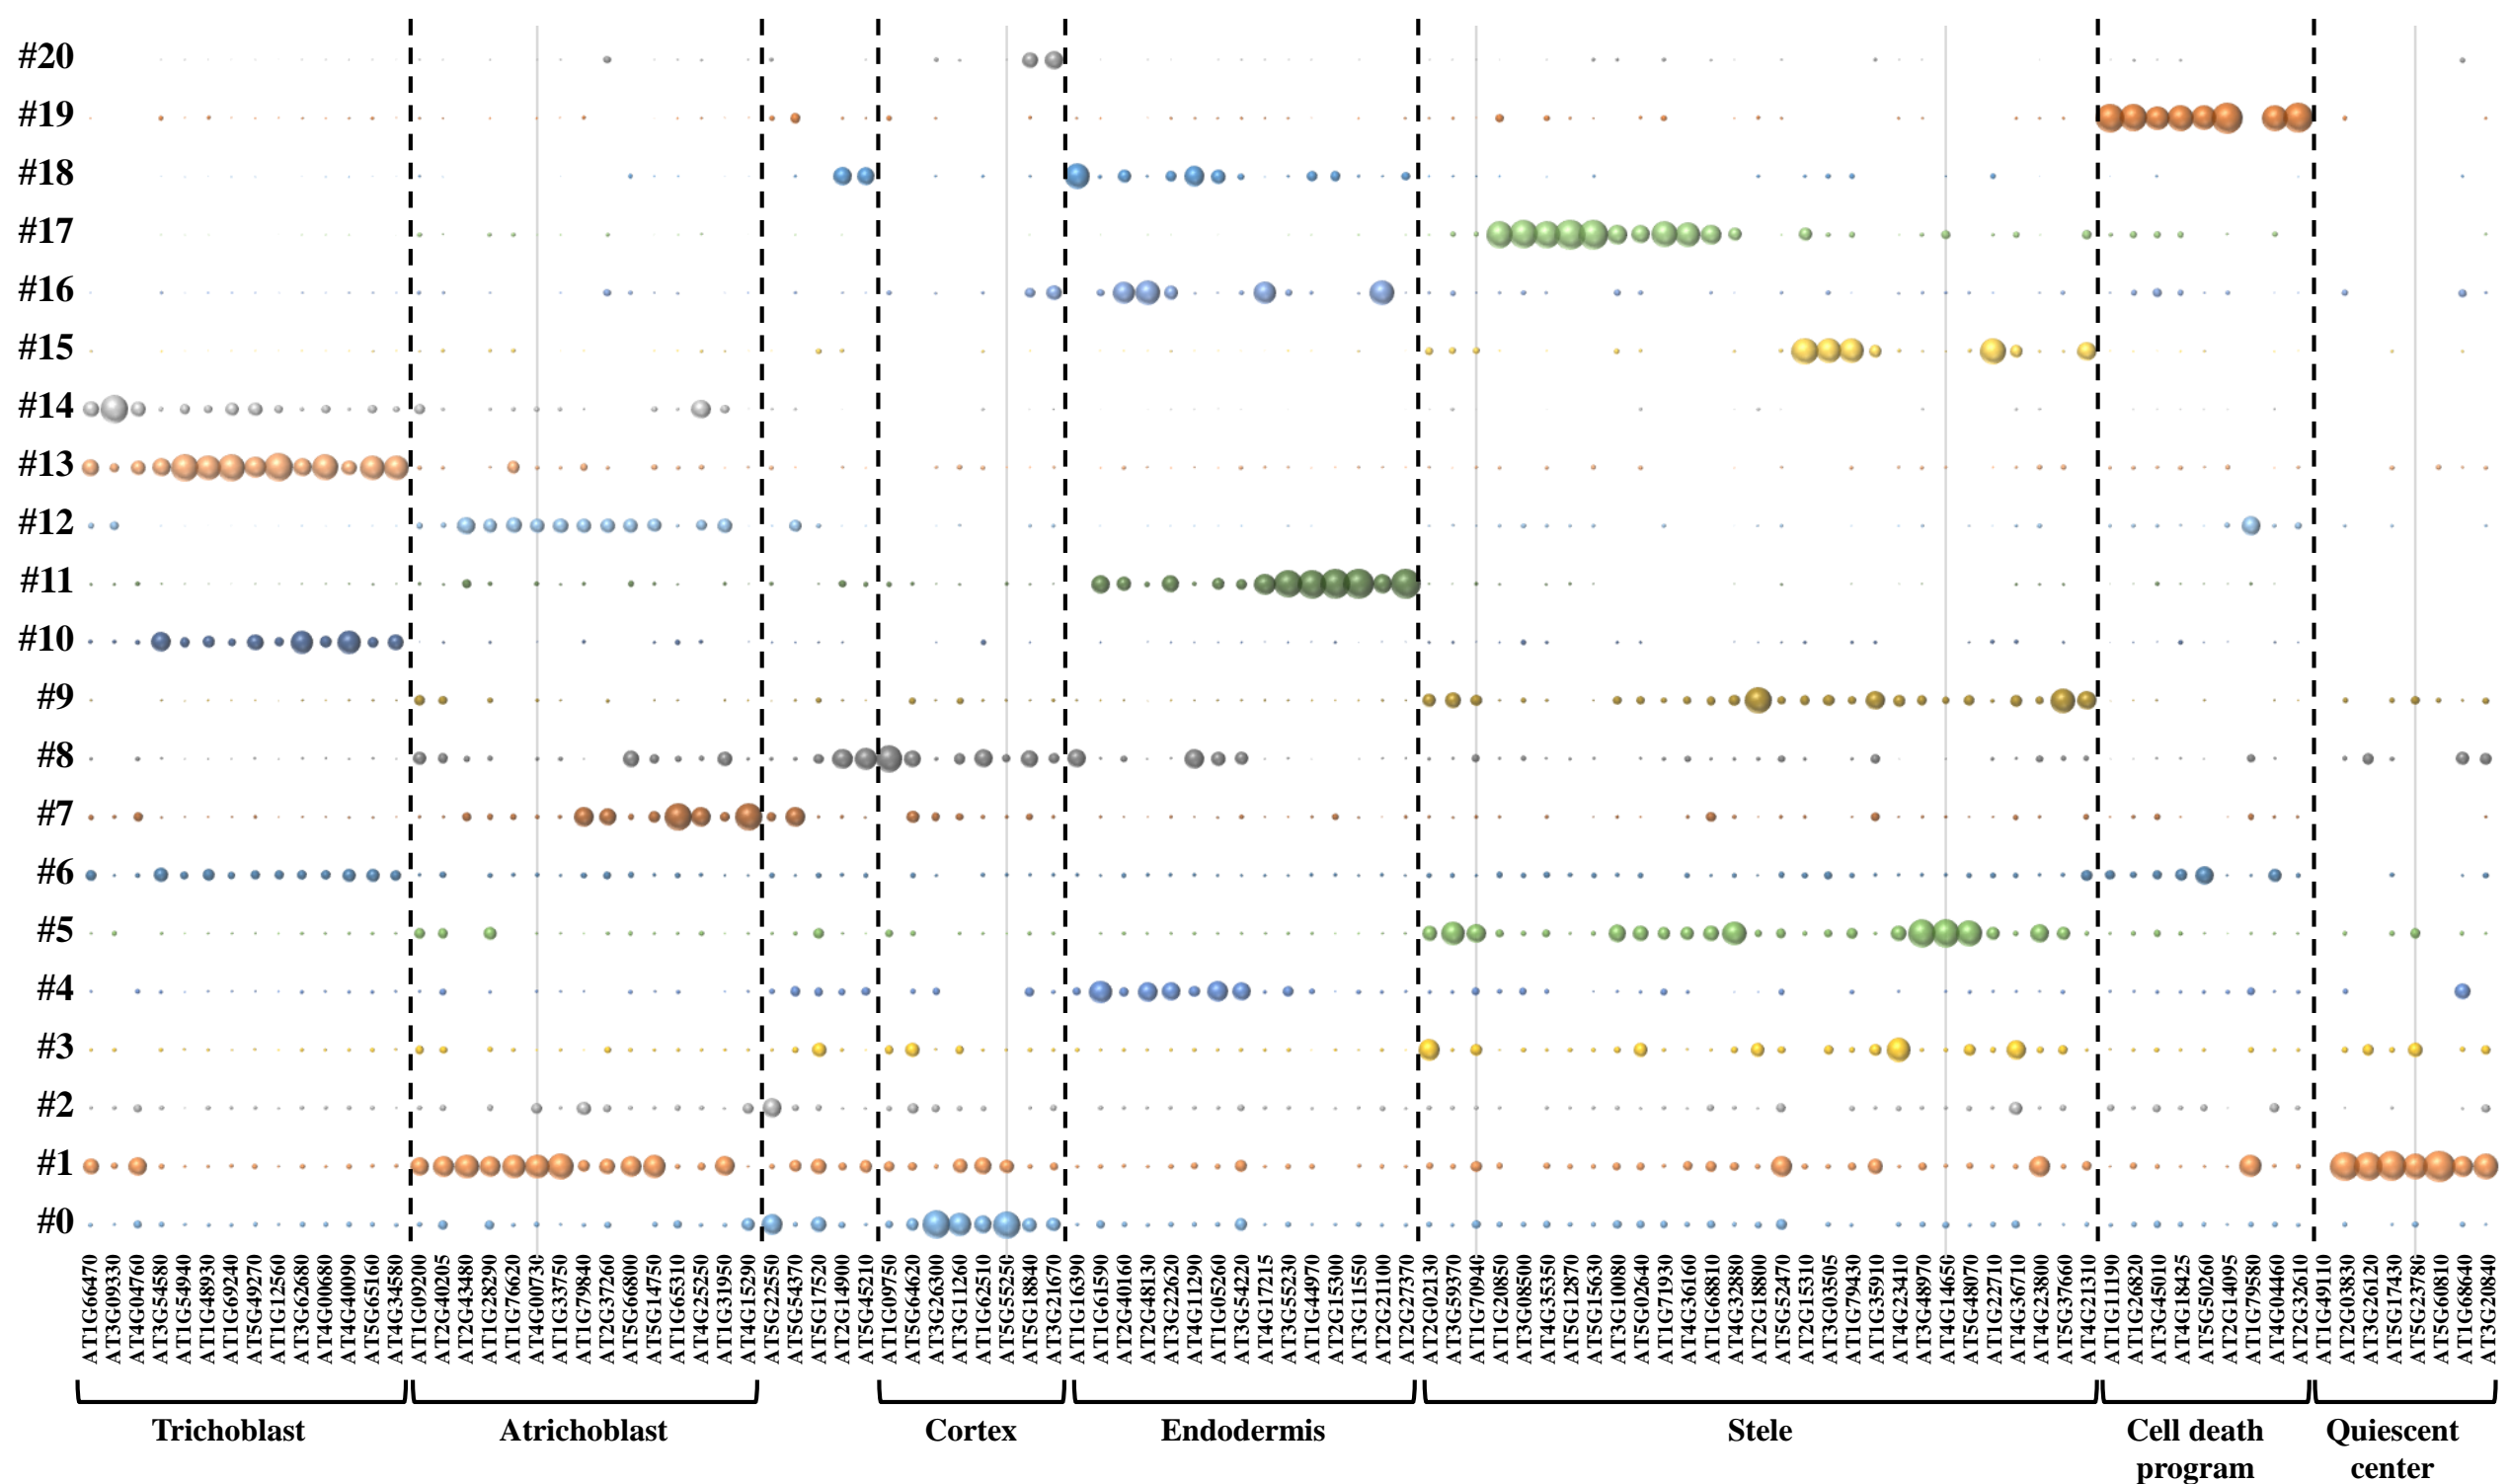

**Figure 2. A.** Assignment of Arabidopsis root cell-types based on the characterization of the expression profile of cell-type and cell death marker genes. **B.** Normalized expression level of 103 cell-type and cell death marker genes (x-axis, see Supplemental Table 2) across the 21 different clusters (y-axis). sNuc-RNaseq dataset were used to create this figure. The diameter of each circle reflects the relative expression of the genes in each cell cluster. As a comparison, the transcriptional activity of these genes in Arabidopsis protoplasts [9] is provided in Supplemental Figure 4.



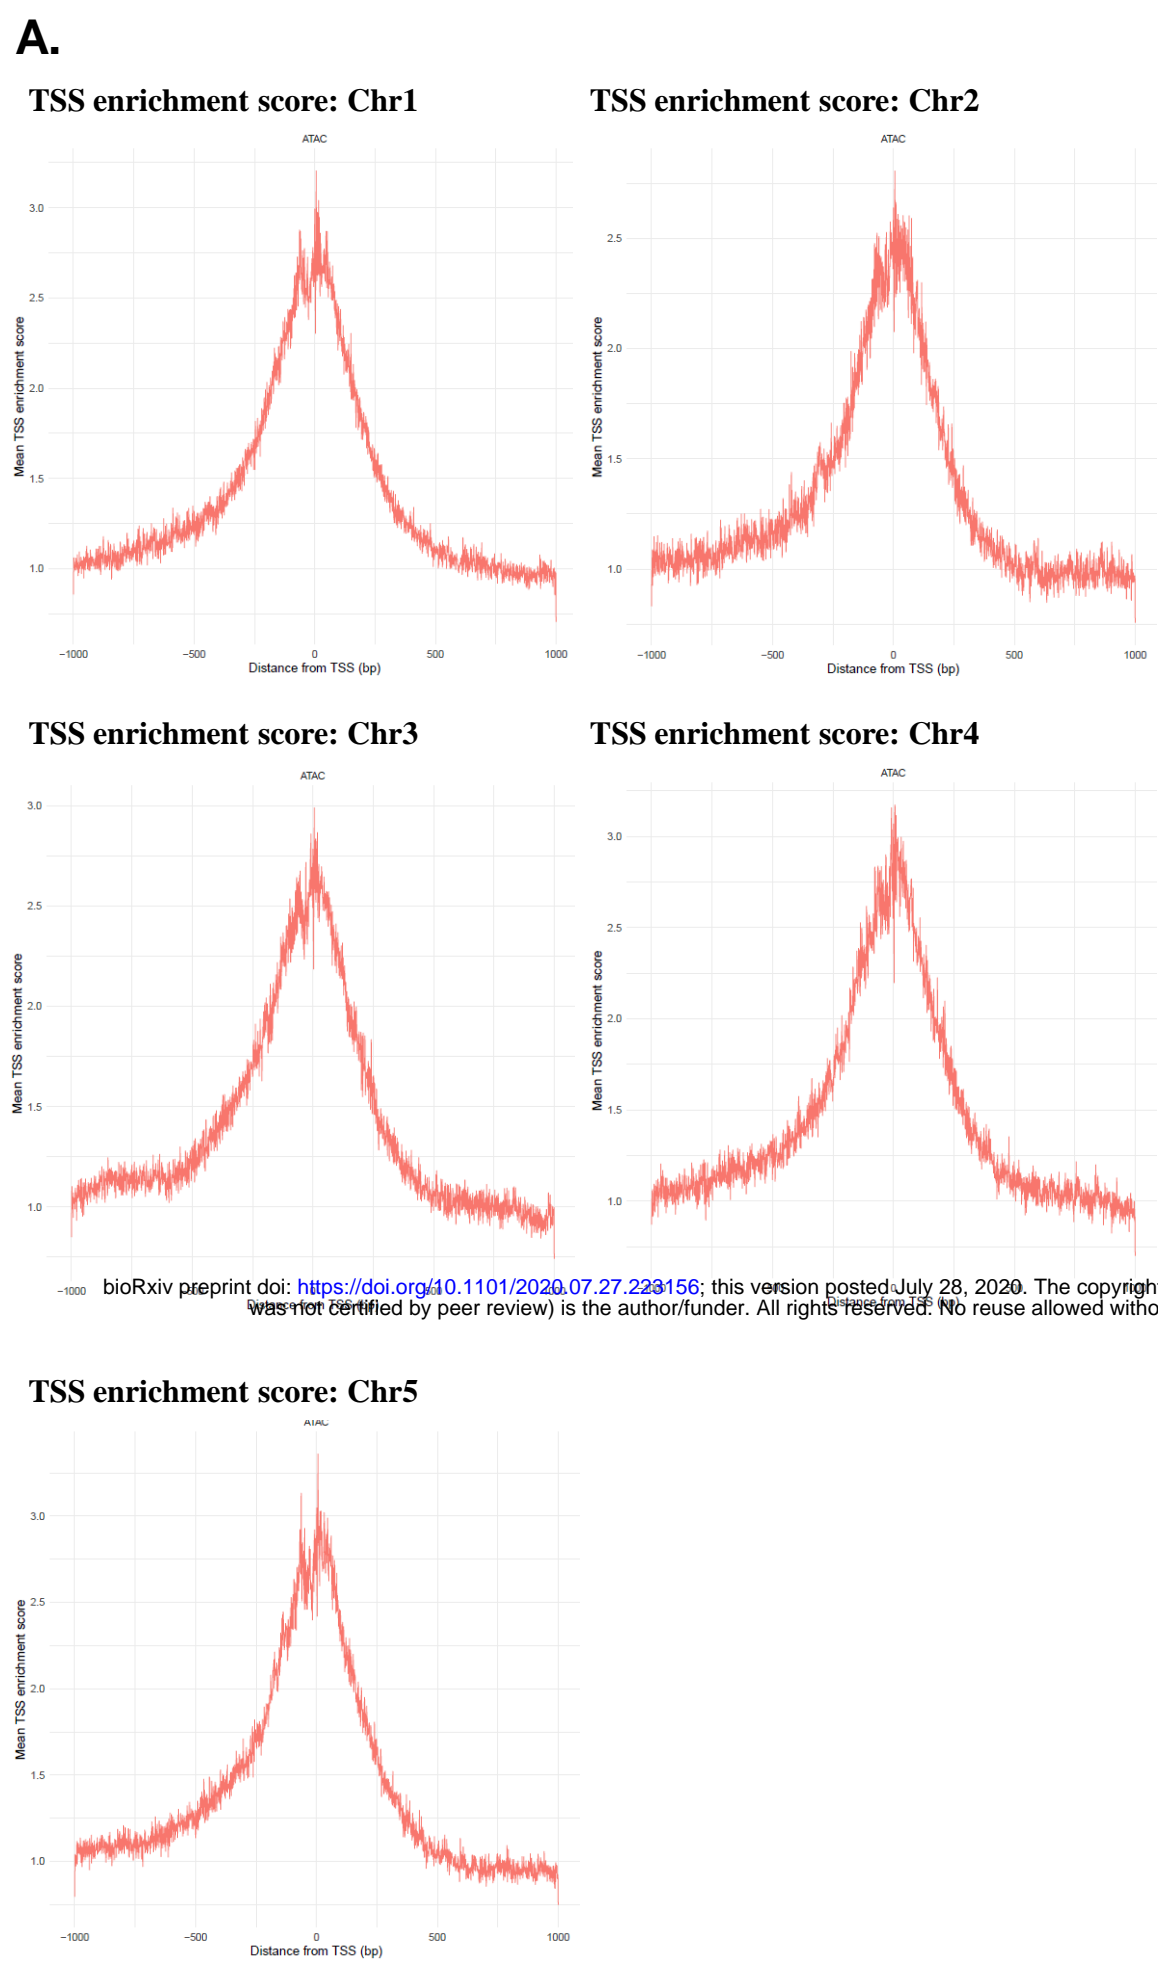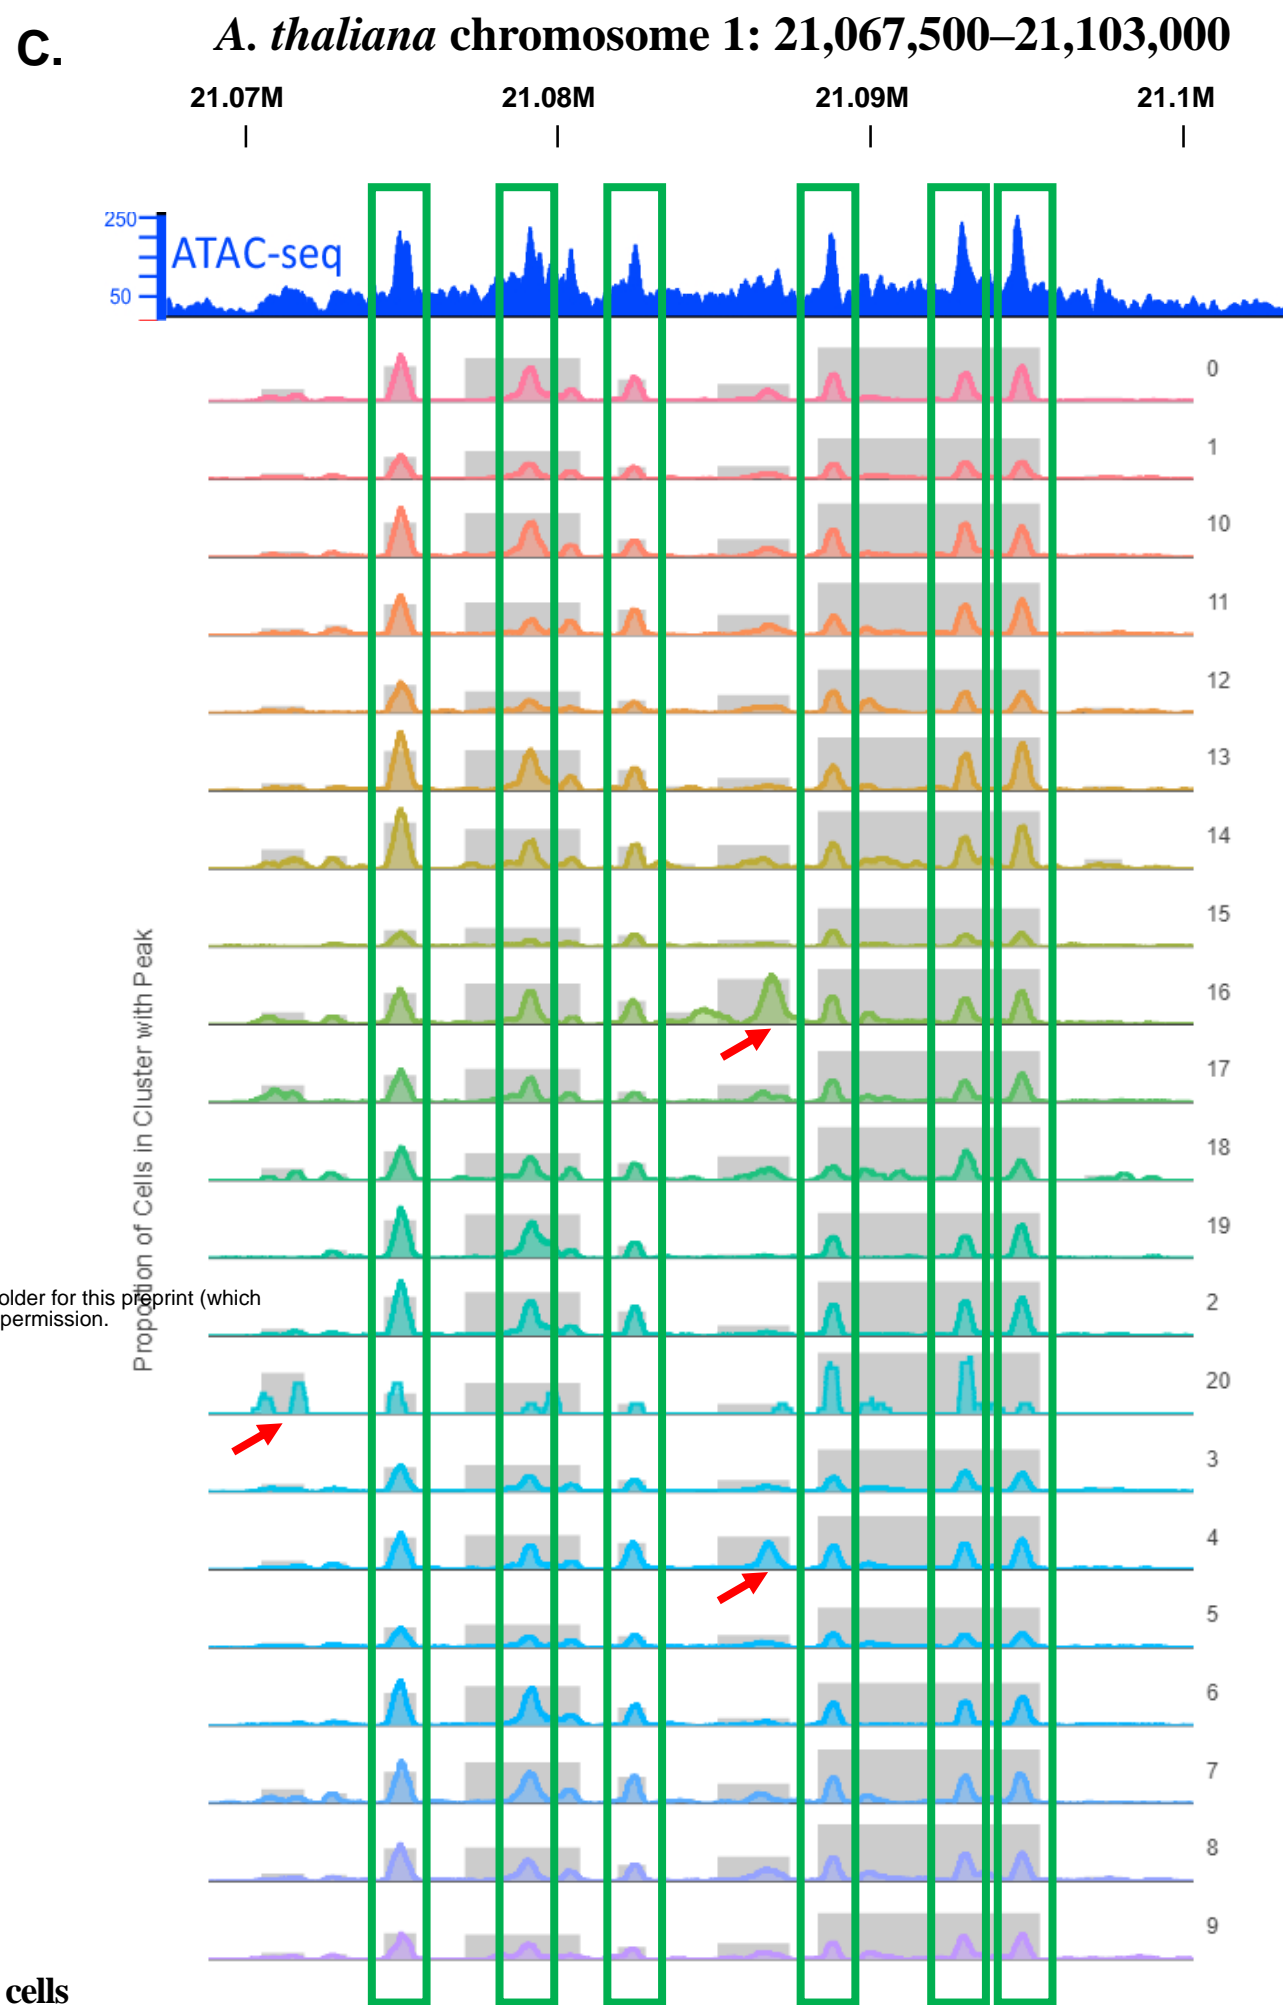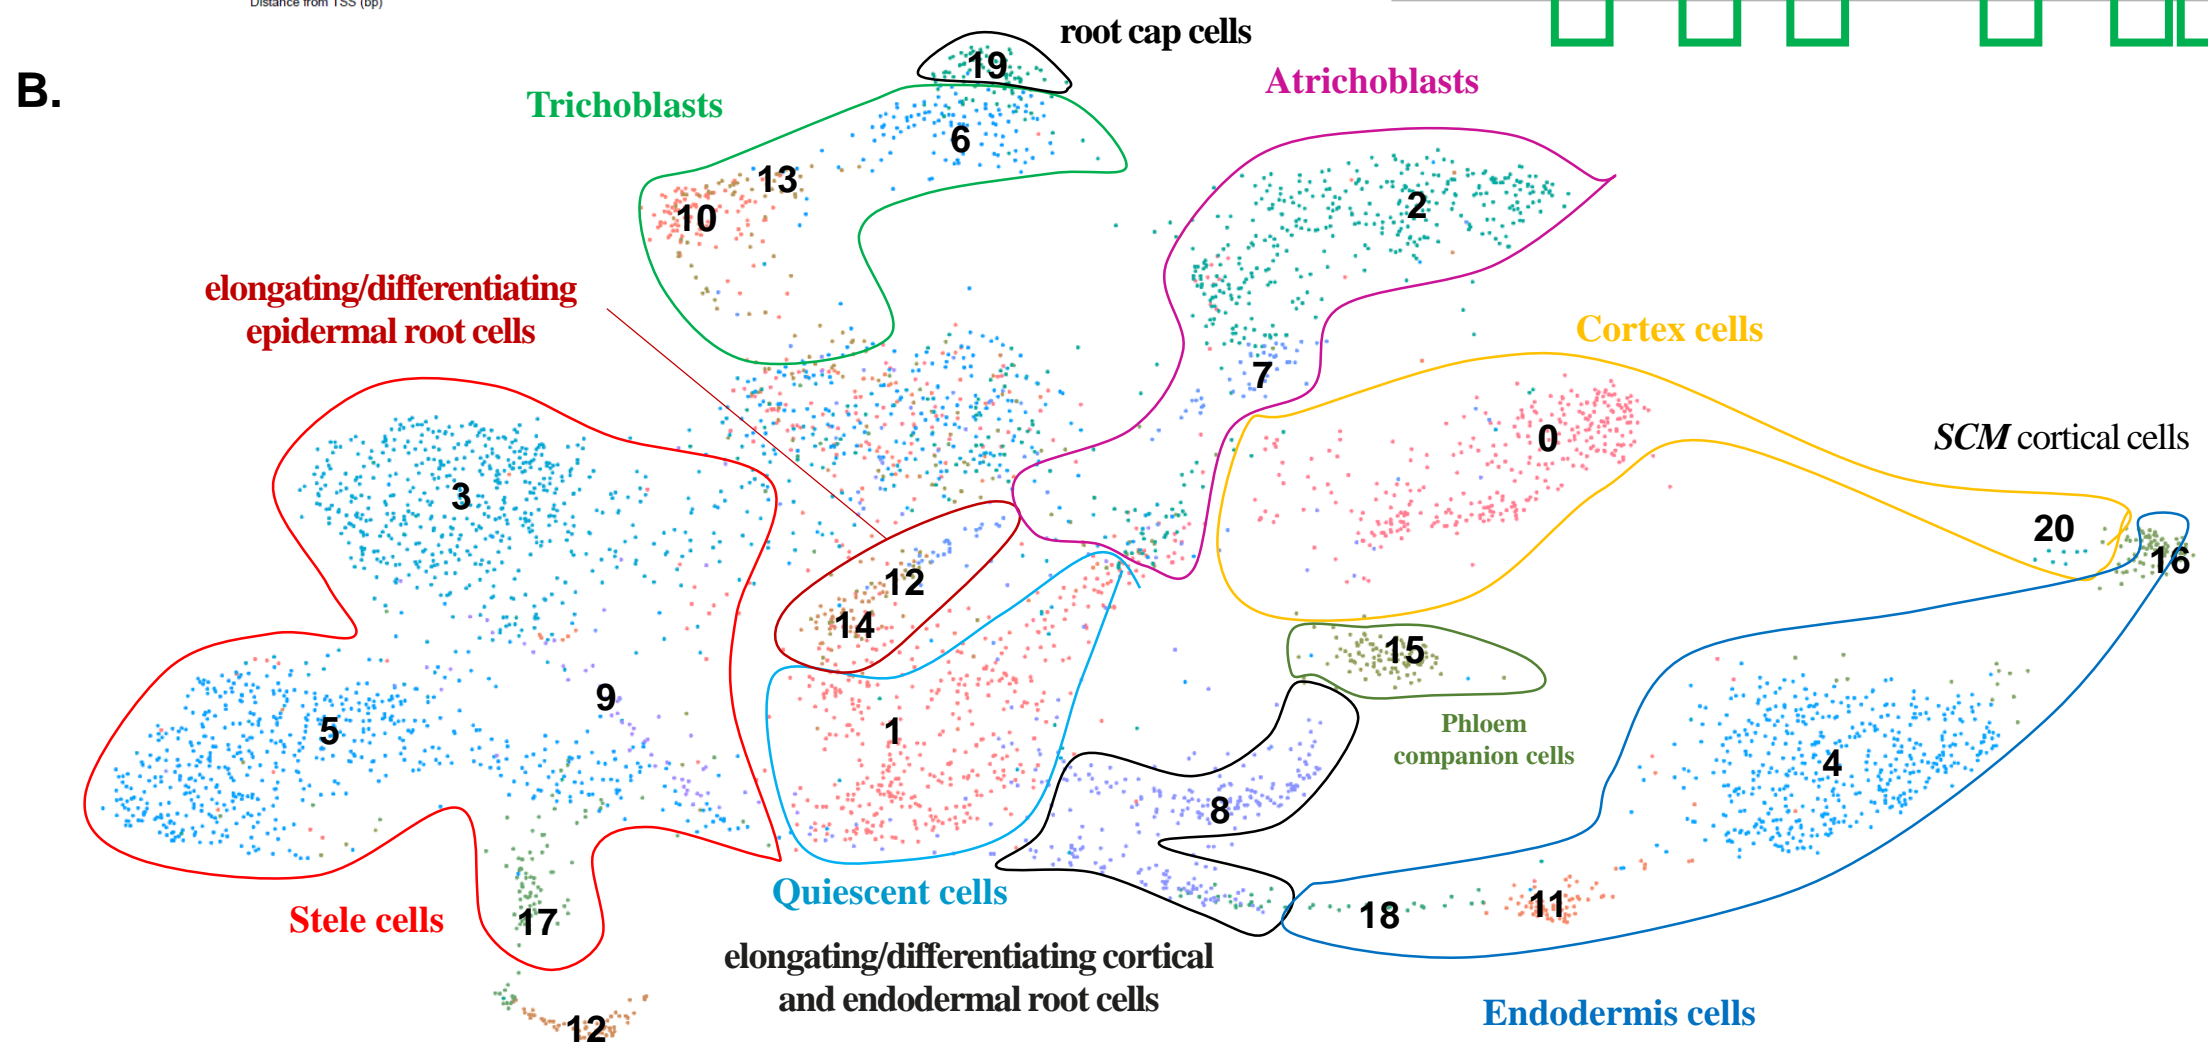

**Figure 3.** Use of sNucATAC-seq technology to characterize the differential folding of the chromatin fiber between Arabidopsis root cell types. **A.** Distribution of accessible regions of the chromatin fiber located around the TSS of the genes on the 5 Arabidopsis chromosomes after applying sNucATAC-seq technology. **B.** Clustering of Arabidopsis root nuclei upon sNucATAC-seq analysis. The numerical annotation of these clusters is the same as for the sNucRNA-seq clusters (Figure 2A). Taking advantage of the integrative sNucATAC-seq and sc/sNucRNA-seq analysis, we functionally assigned each of the 21 sNucATAC-seq Arabidopsis root clusters. **C.** Comparative analysis of the distribution of ATAC-seq peaks on the *A. thaliana* chromosome 1: 21,067,500–21,103,000. The top blue graphic was generated from a bulk ATAC-seq analysis of the Arabidopsis root seedling [55]. Below is indicated the ATAC-seq peak profiles across the 21 sNucATAC-seq clusters. The red arrows highlight cluster-specific sNucATAC-seq peaks.



A.

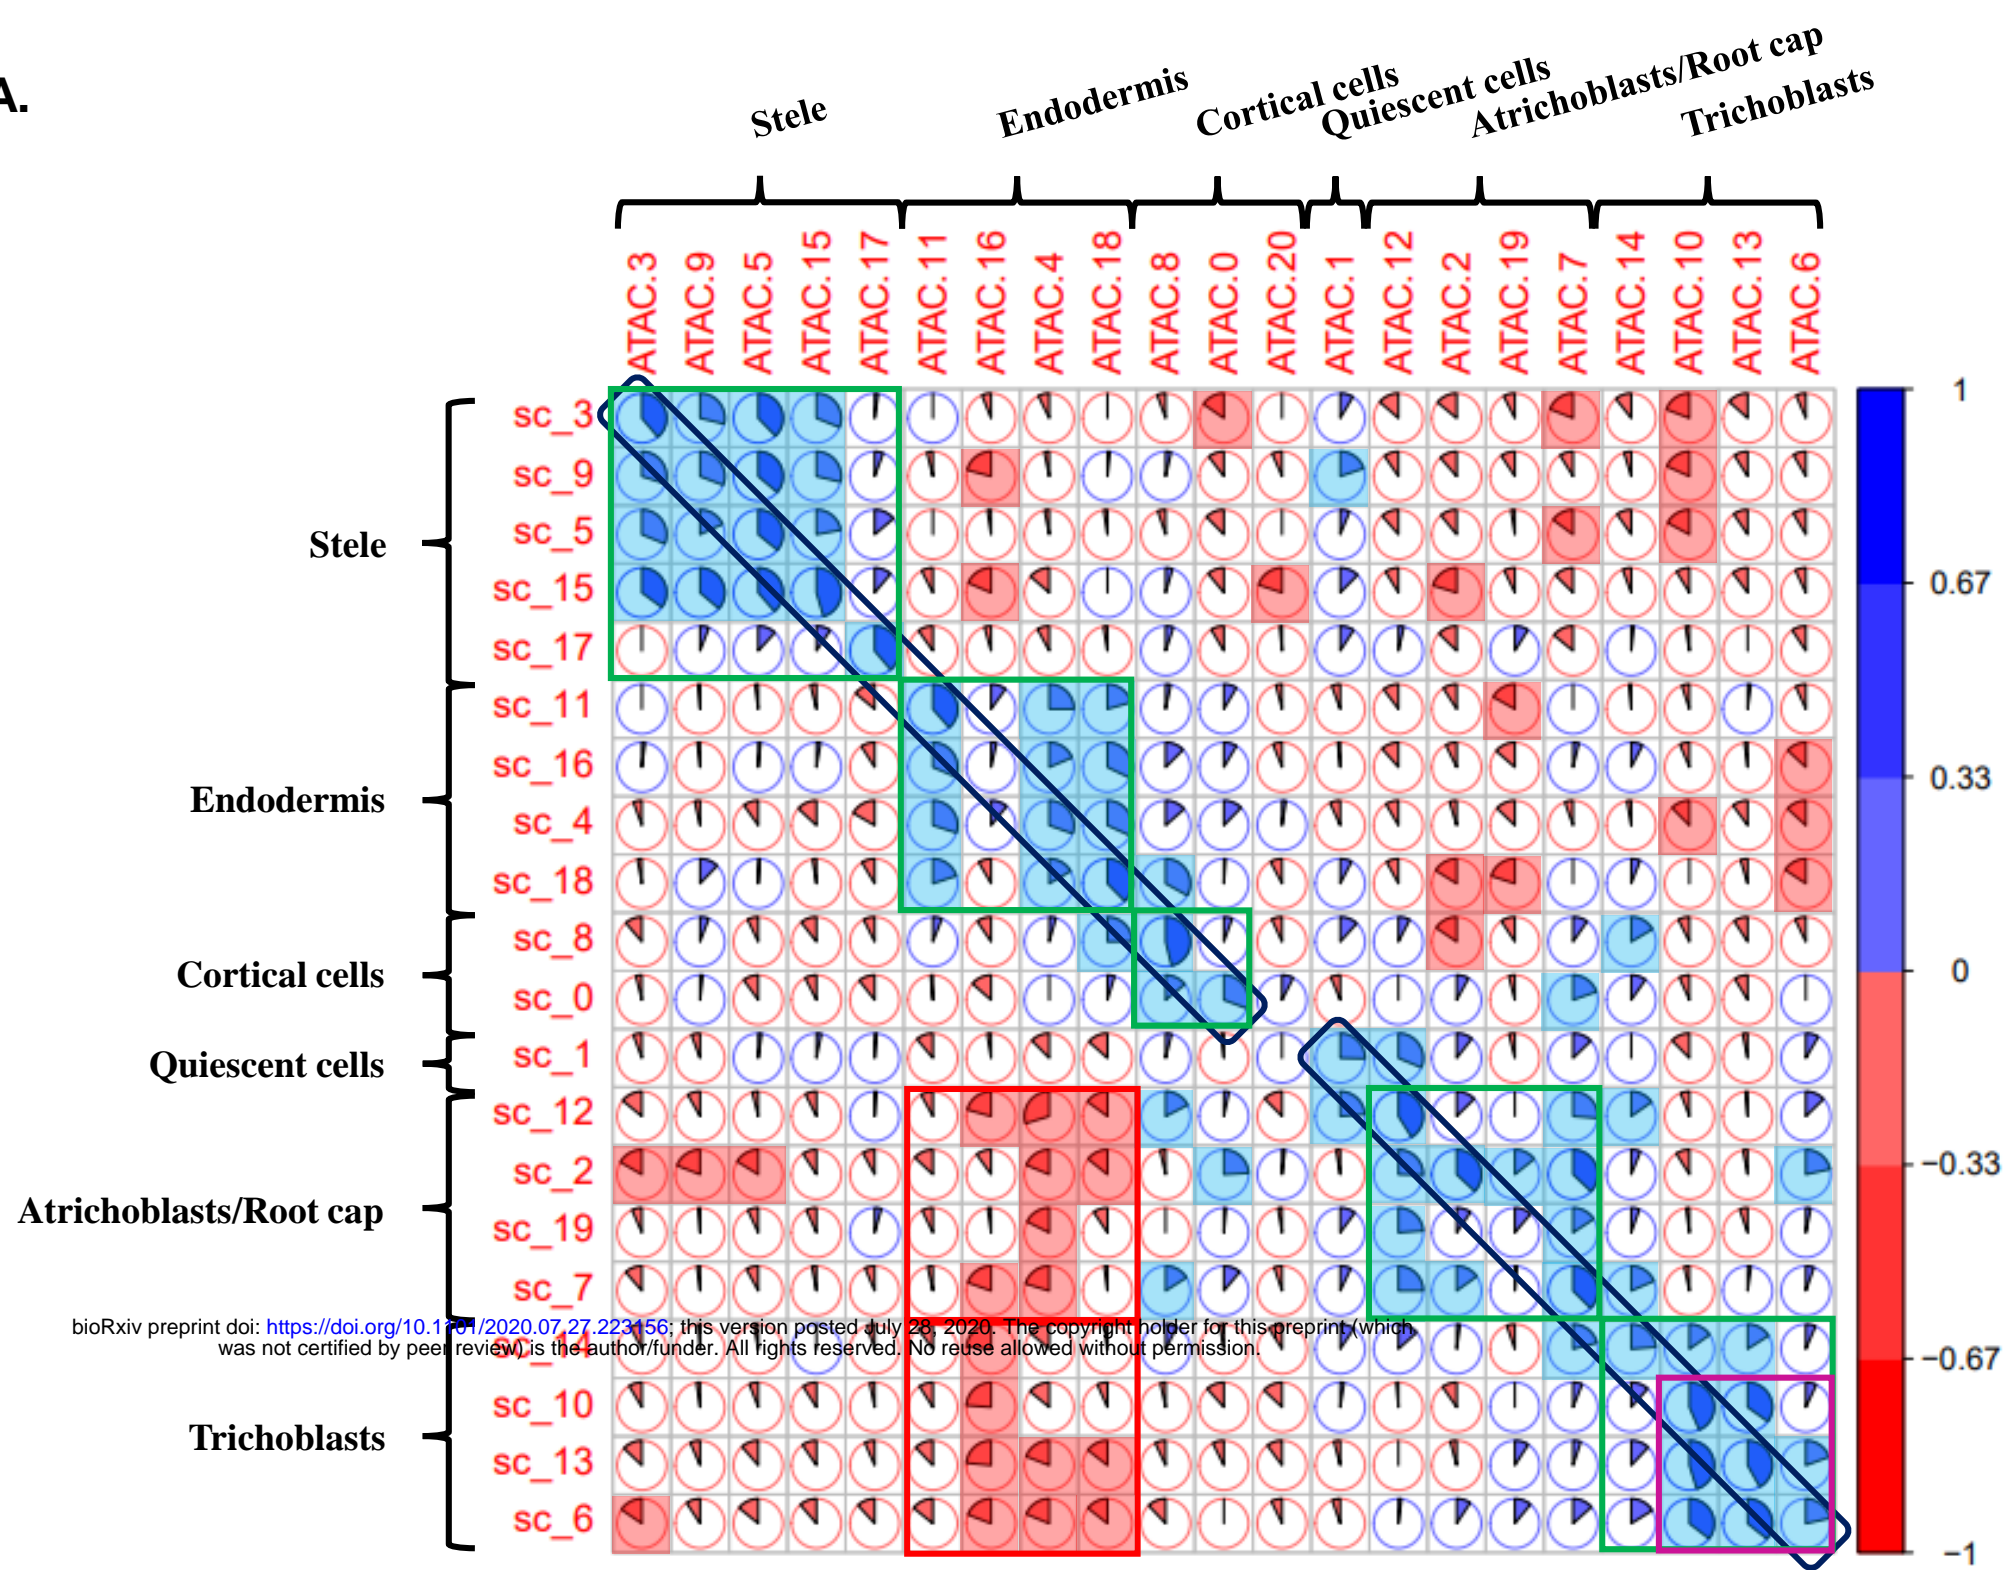

B.

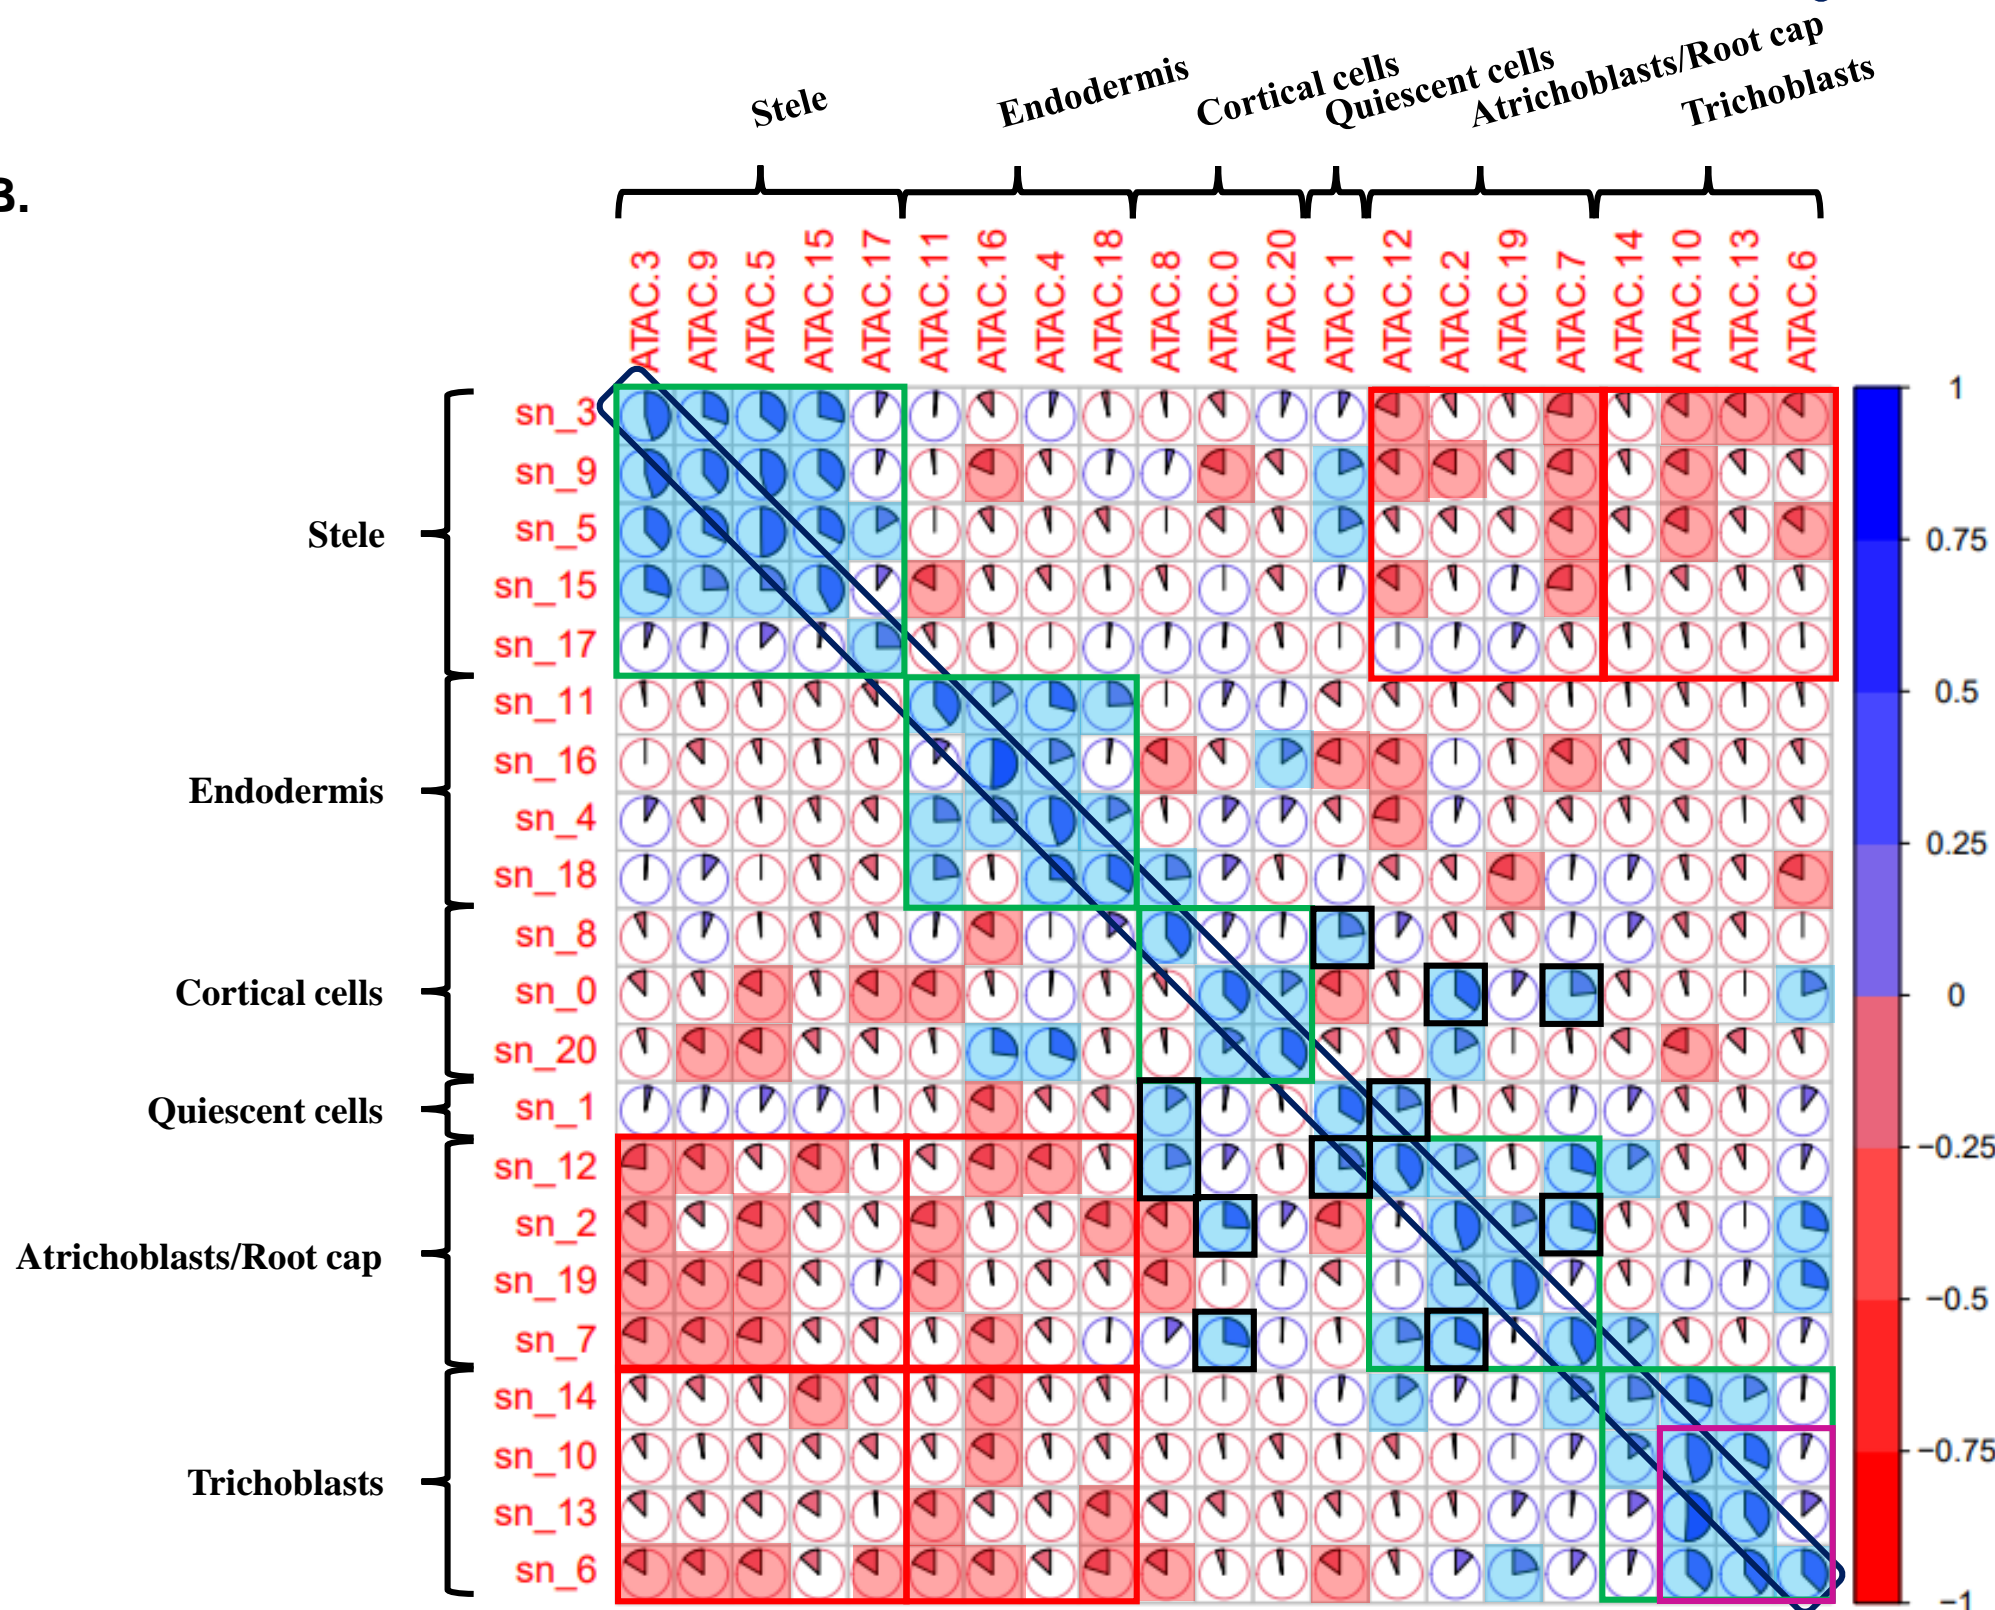

**Figure 4.** Correlation analyses between gene expression and chromatin accessibility of 337 marker genes for each of the 20 and 21 sc (A) and sNucRNA-seq clusters (B). For each correlation analysis, a Kendall tau-b correlation score was calculated based on the ranking of the cluster according to the expression level of the gene and the level of accessibility of the chromatin fiber (see pies). When significant ( $p$ -value  $< 0.01$ ), positive and negative correlations are highlighted in blue or red, respectively. Co-annotated sc/sNucRNA-seq and sNucATAC-seq are highlighted in a dark purple box located in the diagonal of each figure. Positive and negative correlation between clusters that belong to super-clusters (i.e., stele, endodermis, cortical cells, quiescent cells, atrichoblasts and trichoblasts) are highlighted in green and red boxes, respectively. Other noticeable significant correlations are highlighted in black boxes.



A.

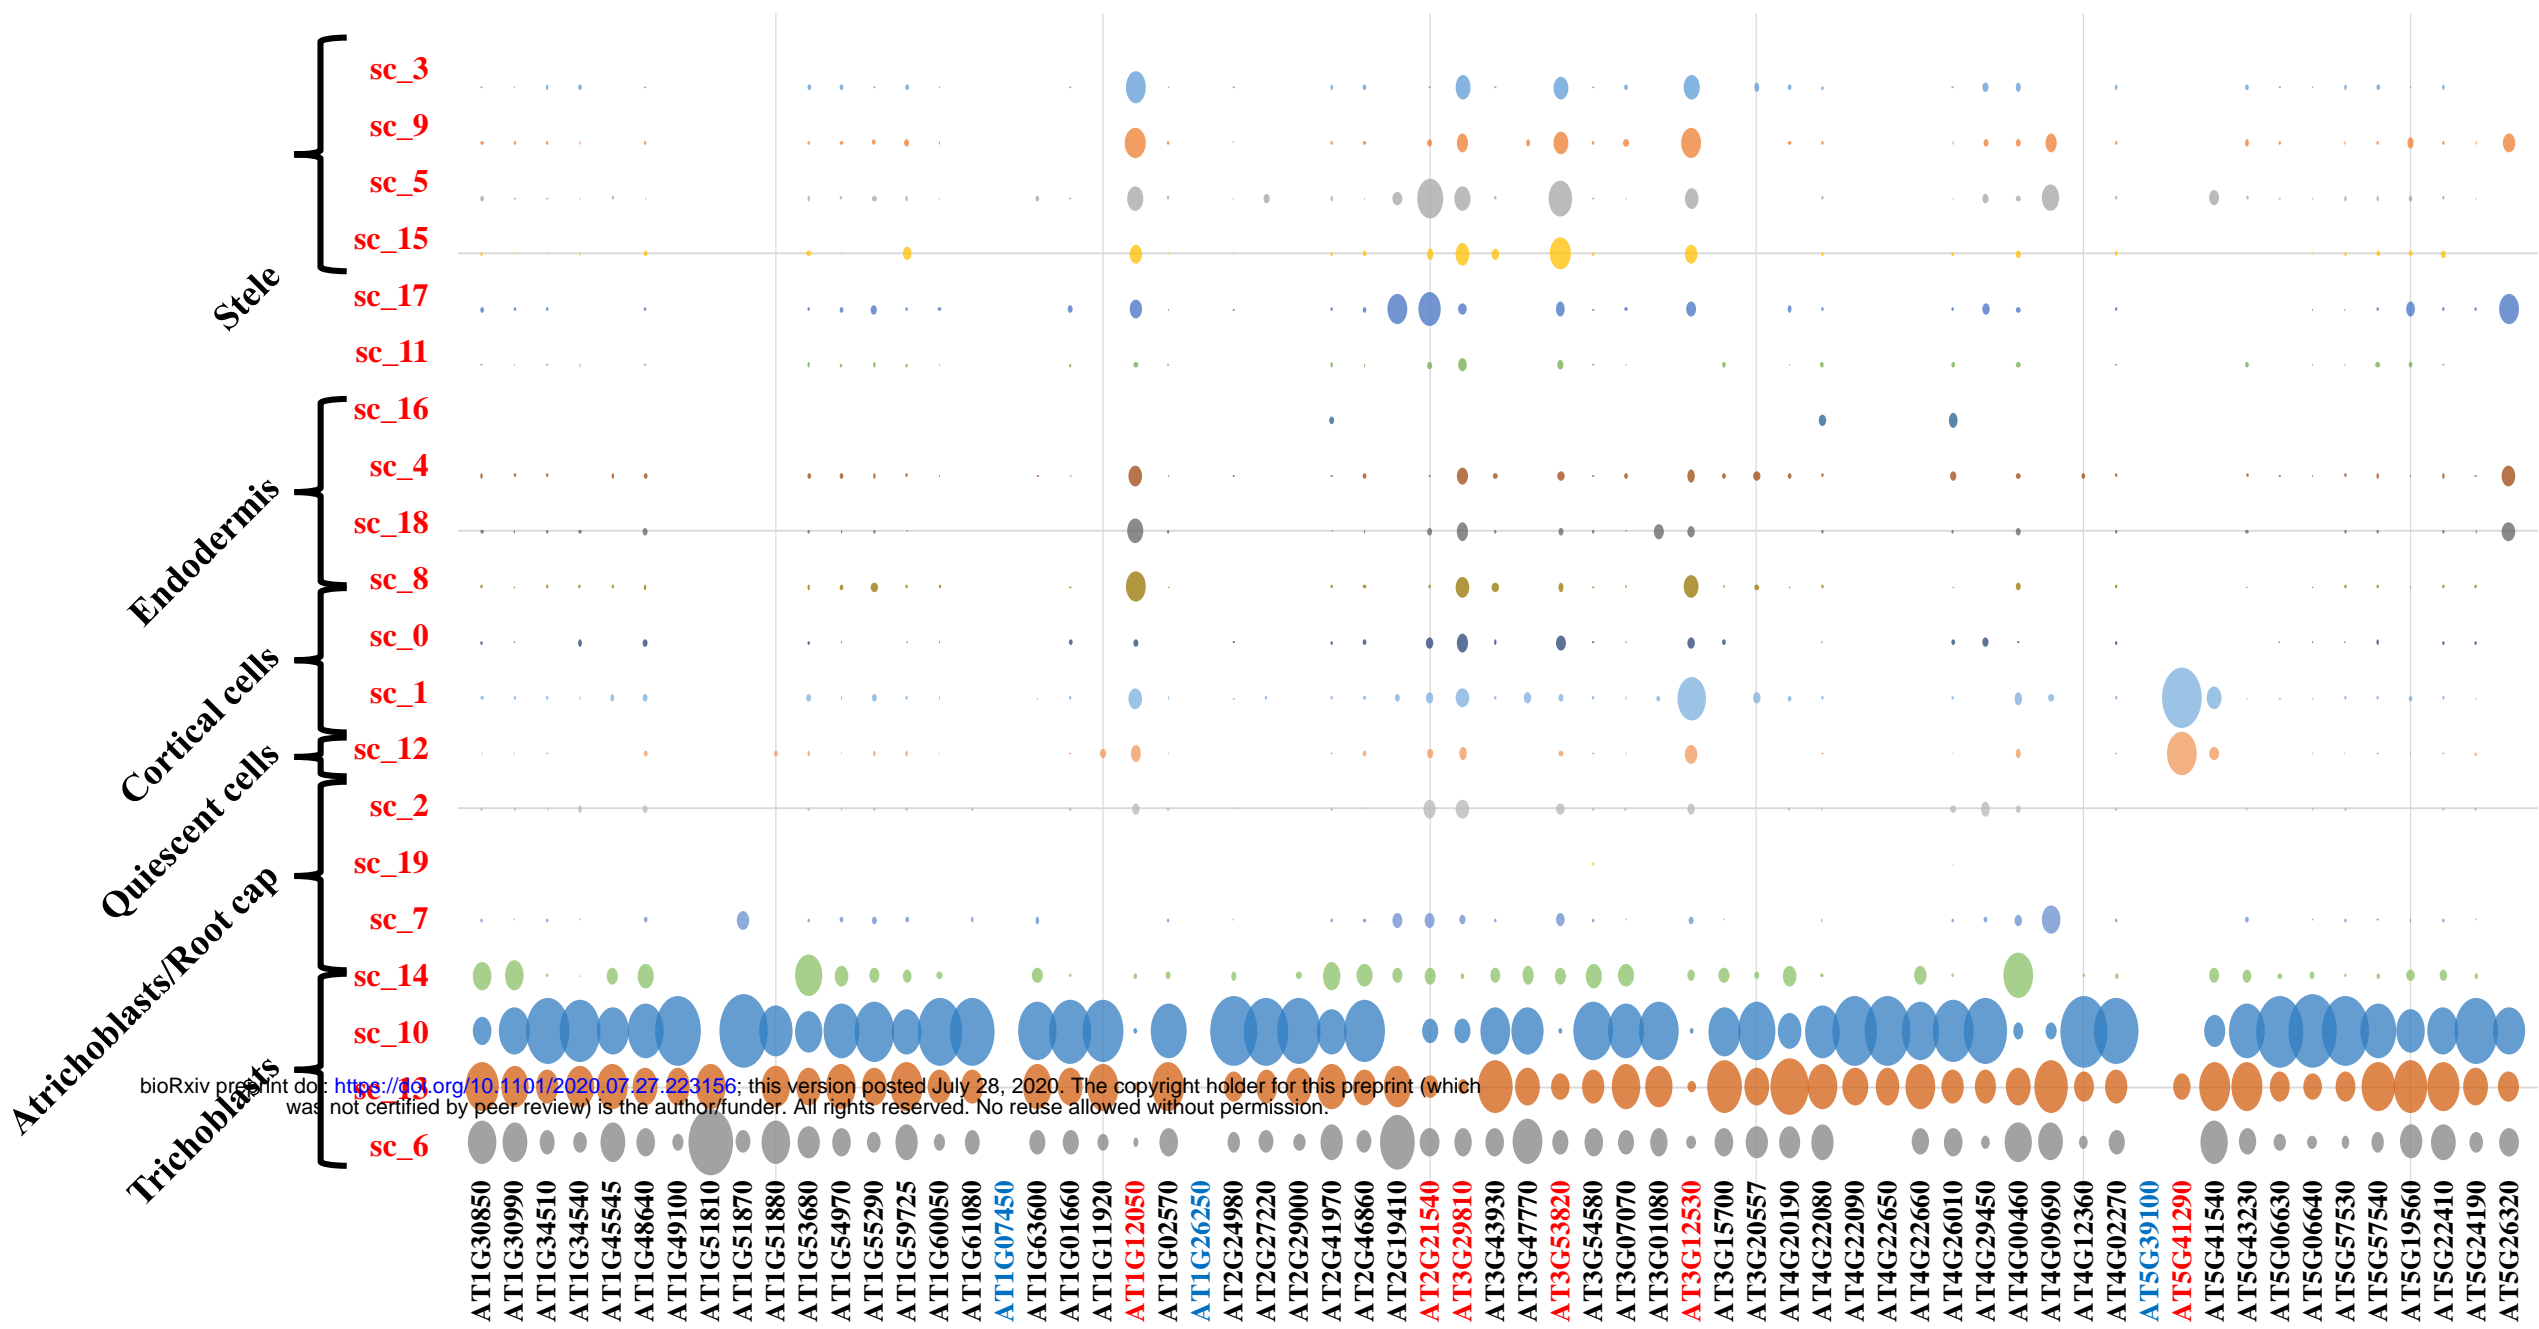

B.

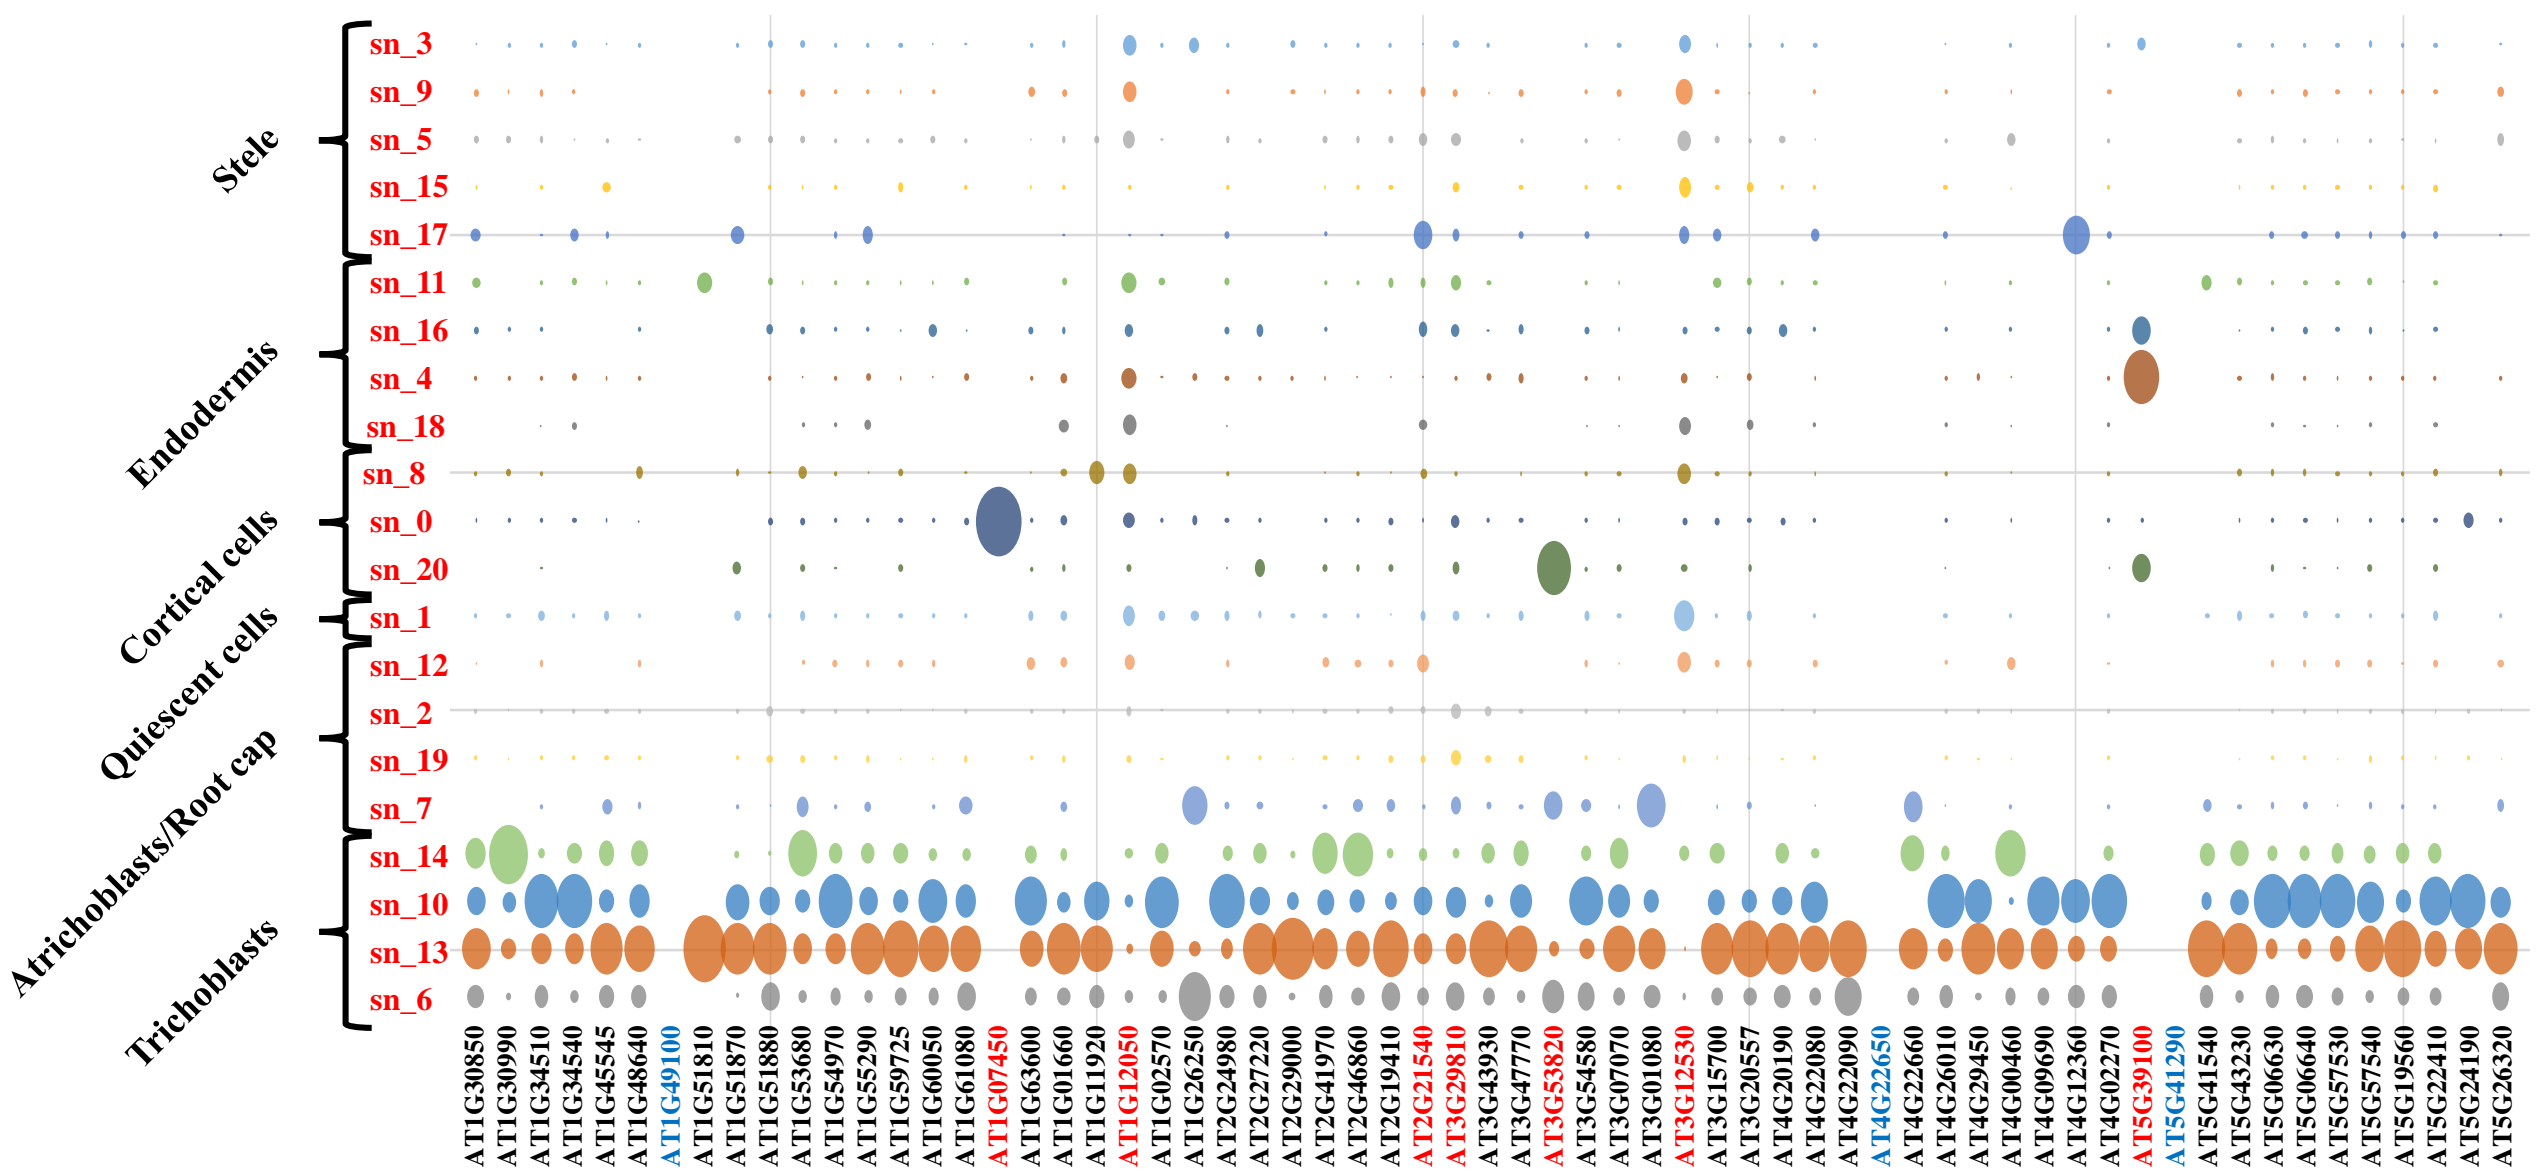

**Figure 5.** Normalized expression level of 63 Arabidopsis genes (x-axis) characterized by their higher accessibility of their TSS in the root hair clusters #6, 10, and 13 (Figure 5B). Gene expression levels were quantified by using scRNA-seq (A) and sNucRNA-seq (B). The diameter of each circle reflects the relative expression of the genes in each cell cluster (y-axis). Genes highlighted in red are not considered as root-hair specific based on their transcriptional patterns. Those highlighted in blue are not found expressed according to the sc (A) and sNucRNA-seq datasets (B).

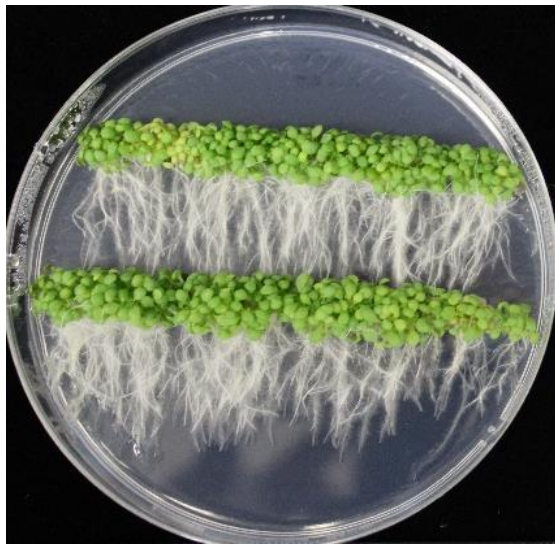

Isolation of root nuclei

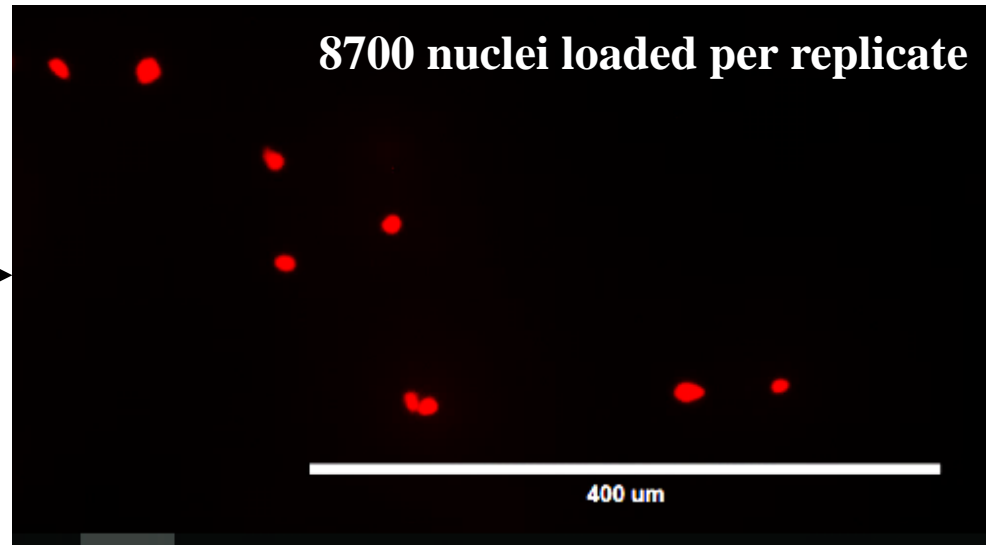

8700 nuclei loaded per replicate

400 μm

6 days-old *A. thaliana* ecotype WS seedlings grown on MS medium

Using a high-throughput droplet-based system compatible with sNucRNA-seq and sNucATAC-seq approaches.

Generation of 2 independent Arabidopsis root sNucATAC-seq libraries

Development of 5 independent Arabidopsis root sNucRNA-seq libraries

bioRxiv preprint doi: <https://doi.org/10.1101/2020.07.27.223156>; this version posted July 28, 2020. The copyright holder for this preprint (which was not certified by peer review) is the author/funder. All rights reserved. No reuse allowed without permission.

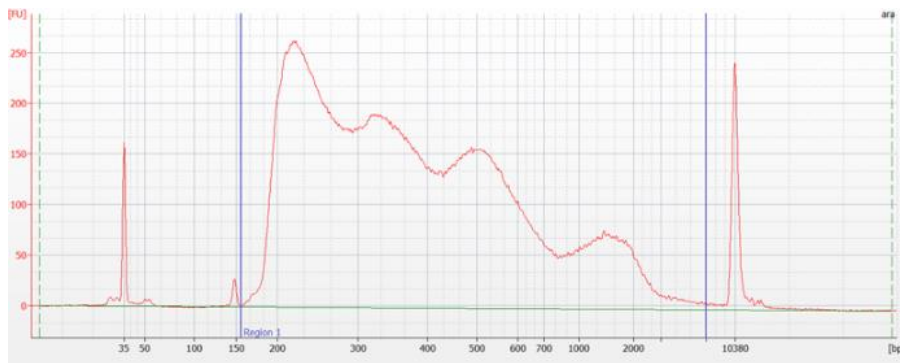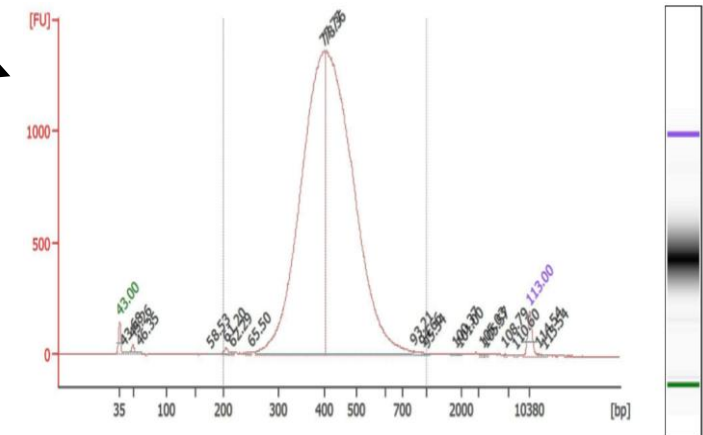

**Supplemental Figure 1.** Schematic representation of the isolation of Arabidopsis root nuclei and their use to create sNucRNA-seq and sNucATAC-seq libraries.

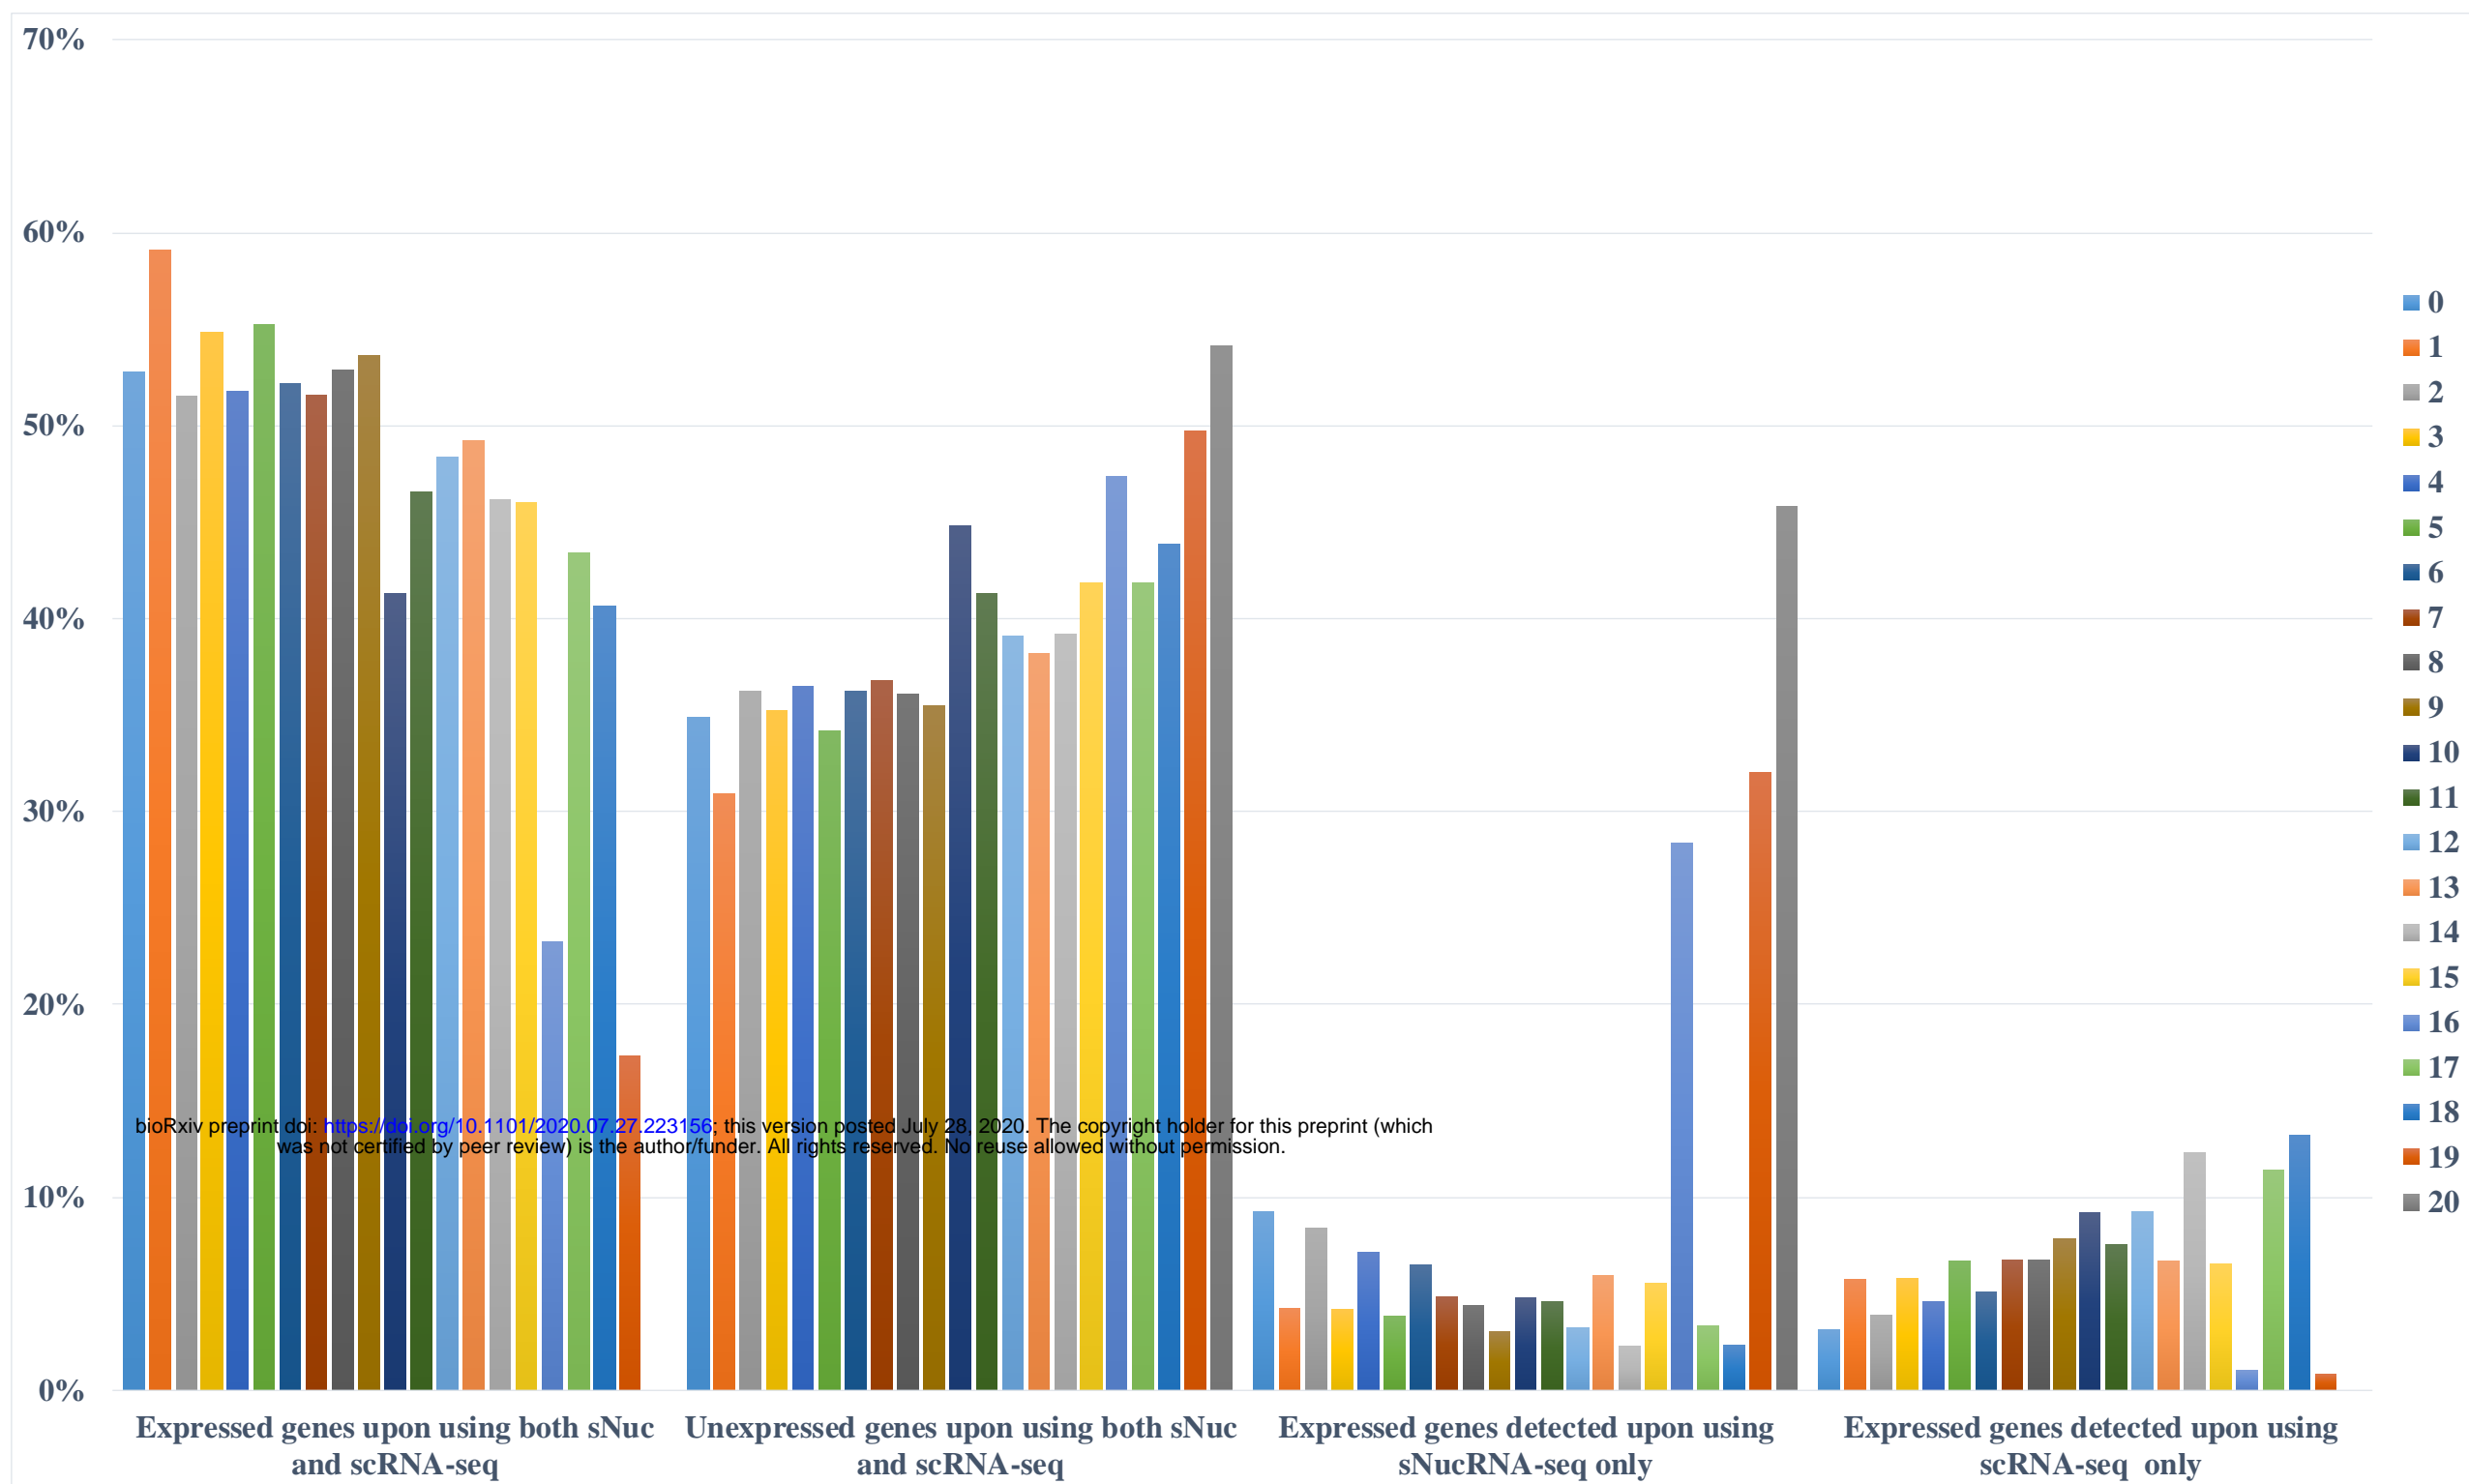

**Supplemental Figure 2.** Percentage of the predicted Arabidopsis protein-coding genes found expressed or unexpressed by using sNucRNA-seq and scRNA-seq technologies. These percentages are provided for each of the 21 clusters described in Figure 1A and B. As a note, the transcriptomes of three clusters (clusters #16, 19, and 20) almost exclusively rely on the use of sNucRNA-seq technology.



**Cluster 0**

Single nuclei; 3119

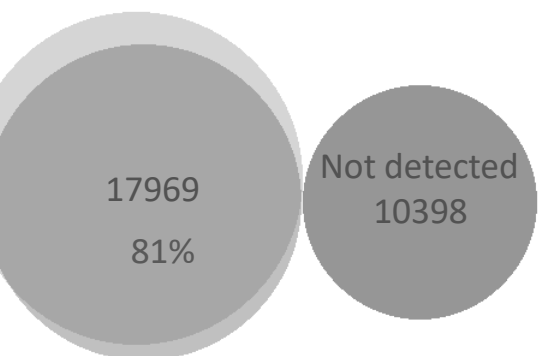

Single cells; 1062

**Cluster 1**

Single nuclei; 1409

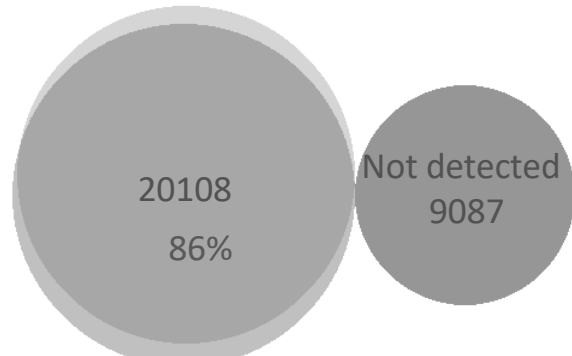

Single cells; 1944

**Cluster 2**

Single nuclei; 2824

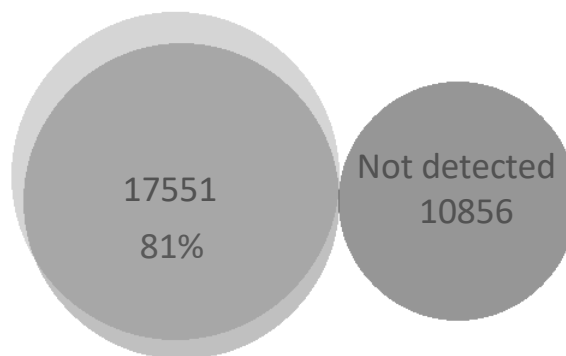

Single cells; 1317

**Cluster 3**

Single nuclei; 1402

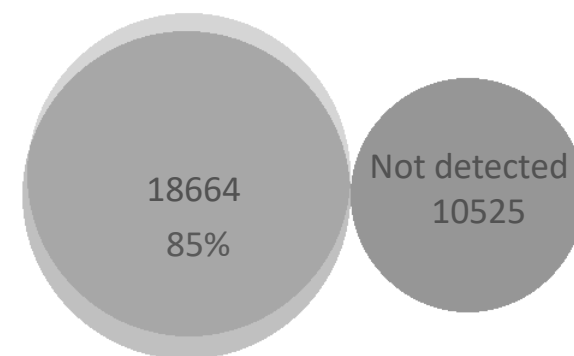

Single cells; 1957

**Cluster 4**

Single nuclei; 1533

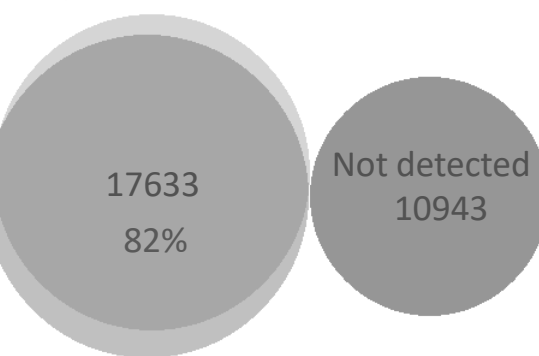

Single cells; 1062

**Cluster 5**

Single nuclei; 1292

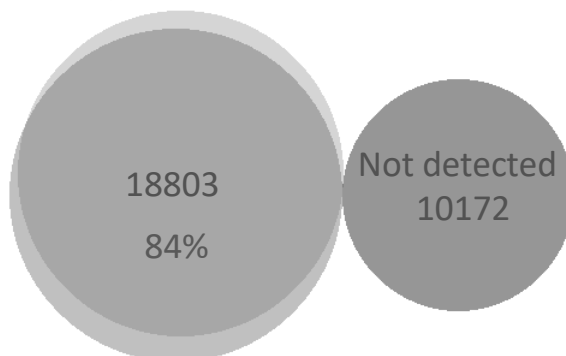

Single cells; 1944

**Cluster 6**

Single nuclei; 2183

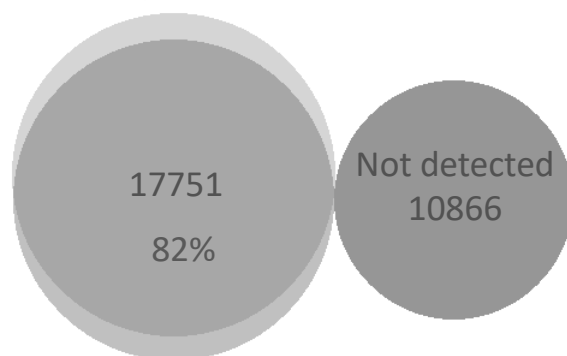

Single cells; 1748

**Cluster 7**

Single nuclei; 1637

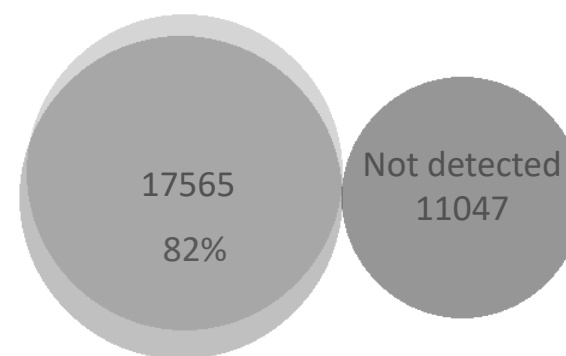

Single cells; 2299

bioRxiv preprint doi: <https://doi.org/10.1101/2020.07.27.223156>; this version posted July 28, 2020. The copyright holder for this preprint (which was not certified by peer review) is the author/funder. All rights reserved. No reuse allowed without permission.

**Cluster 8**

Single nuclei; 1462

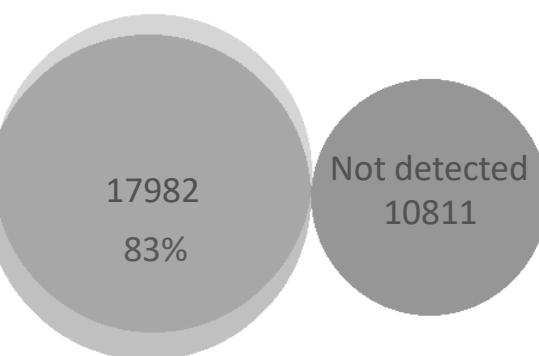

Single cells; 2293

**Cluster 9**

Single nuclei; 1025

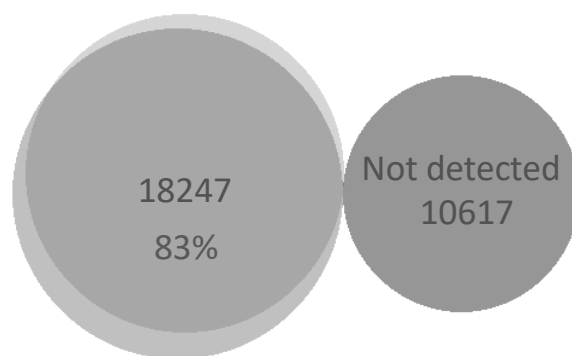

Single cells; 2659

**Cluster 10**

Single nuclei; 1598

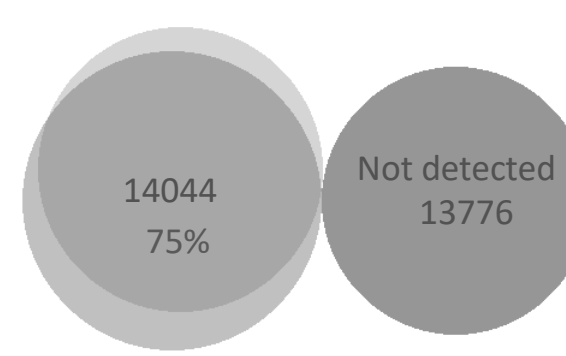

Single cells; 3130

**Cluster 11**

Single nuclei; 1561

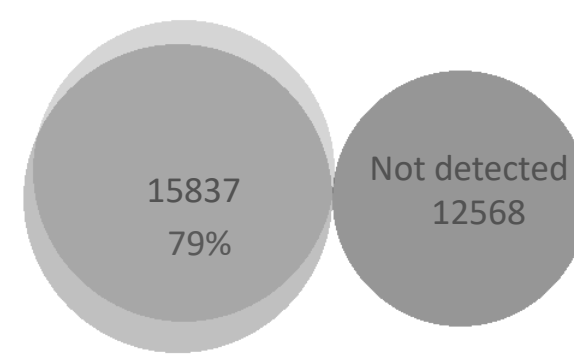

Single cells; 2582

**Cluster 12**

Single nuclei; 1085

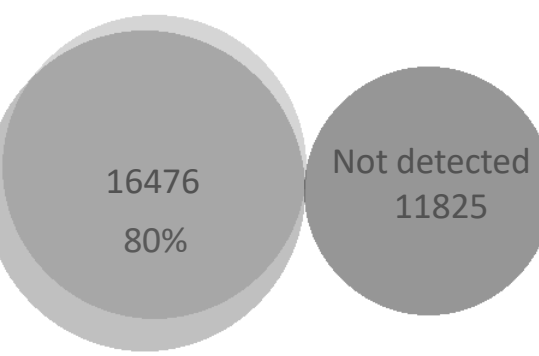

Single cells; 3162

**Cluster 13**

Single nuclei; 2006

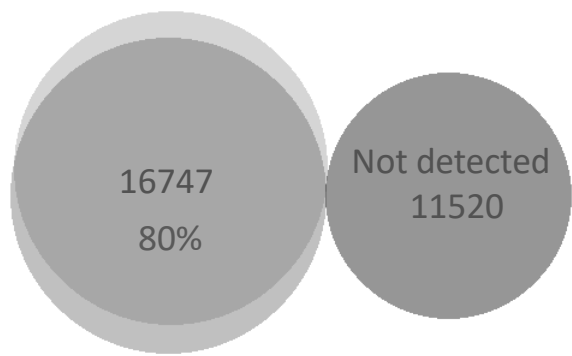

Single cells; 2275

**Cluster 14**

Single nuclei; 773

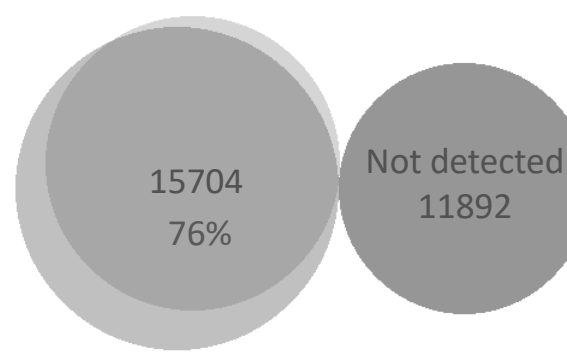

Single cells; 4179

**Cluster 15**

Single nuclei; 1865

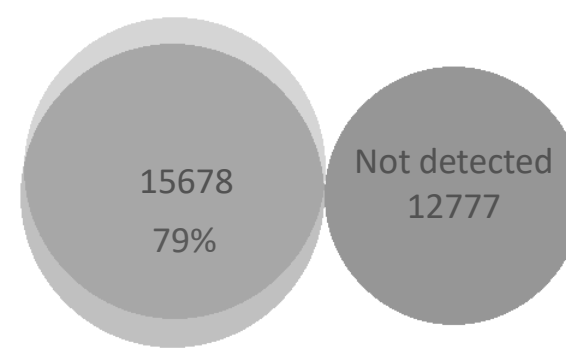

Single cells; 2228

**Supplemental Figure 3.** Venn diagrams showing the number of expressed and non-expressed genes revealed upon applying sNucRNA-seq and single cell-RNAseq technologies. Not including clusters #16, 19 and 20, 80.2% of the expressed genes were identified by both technologies in average.

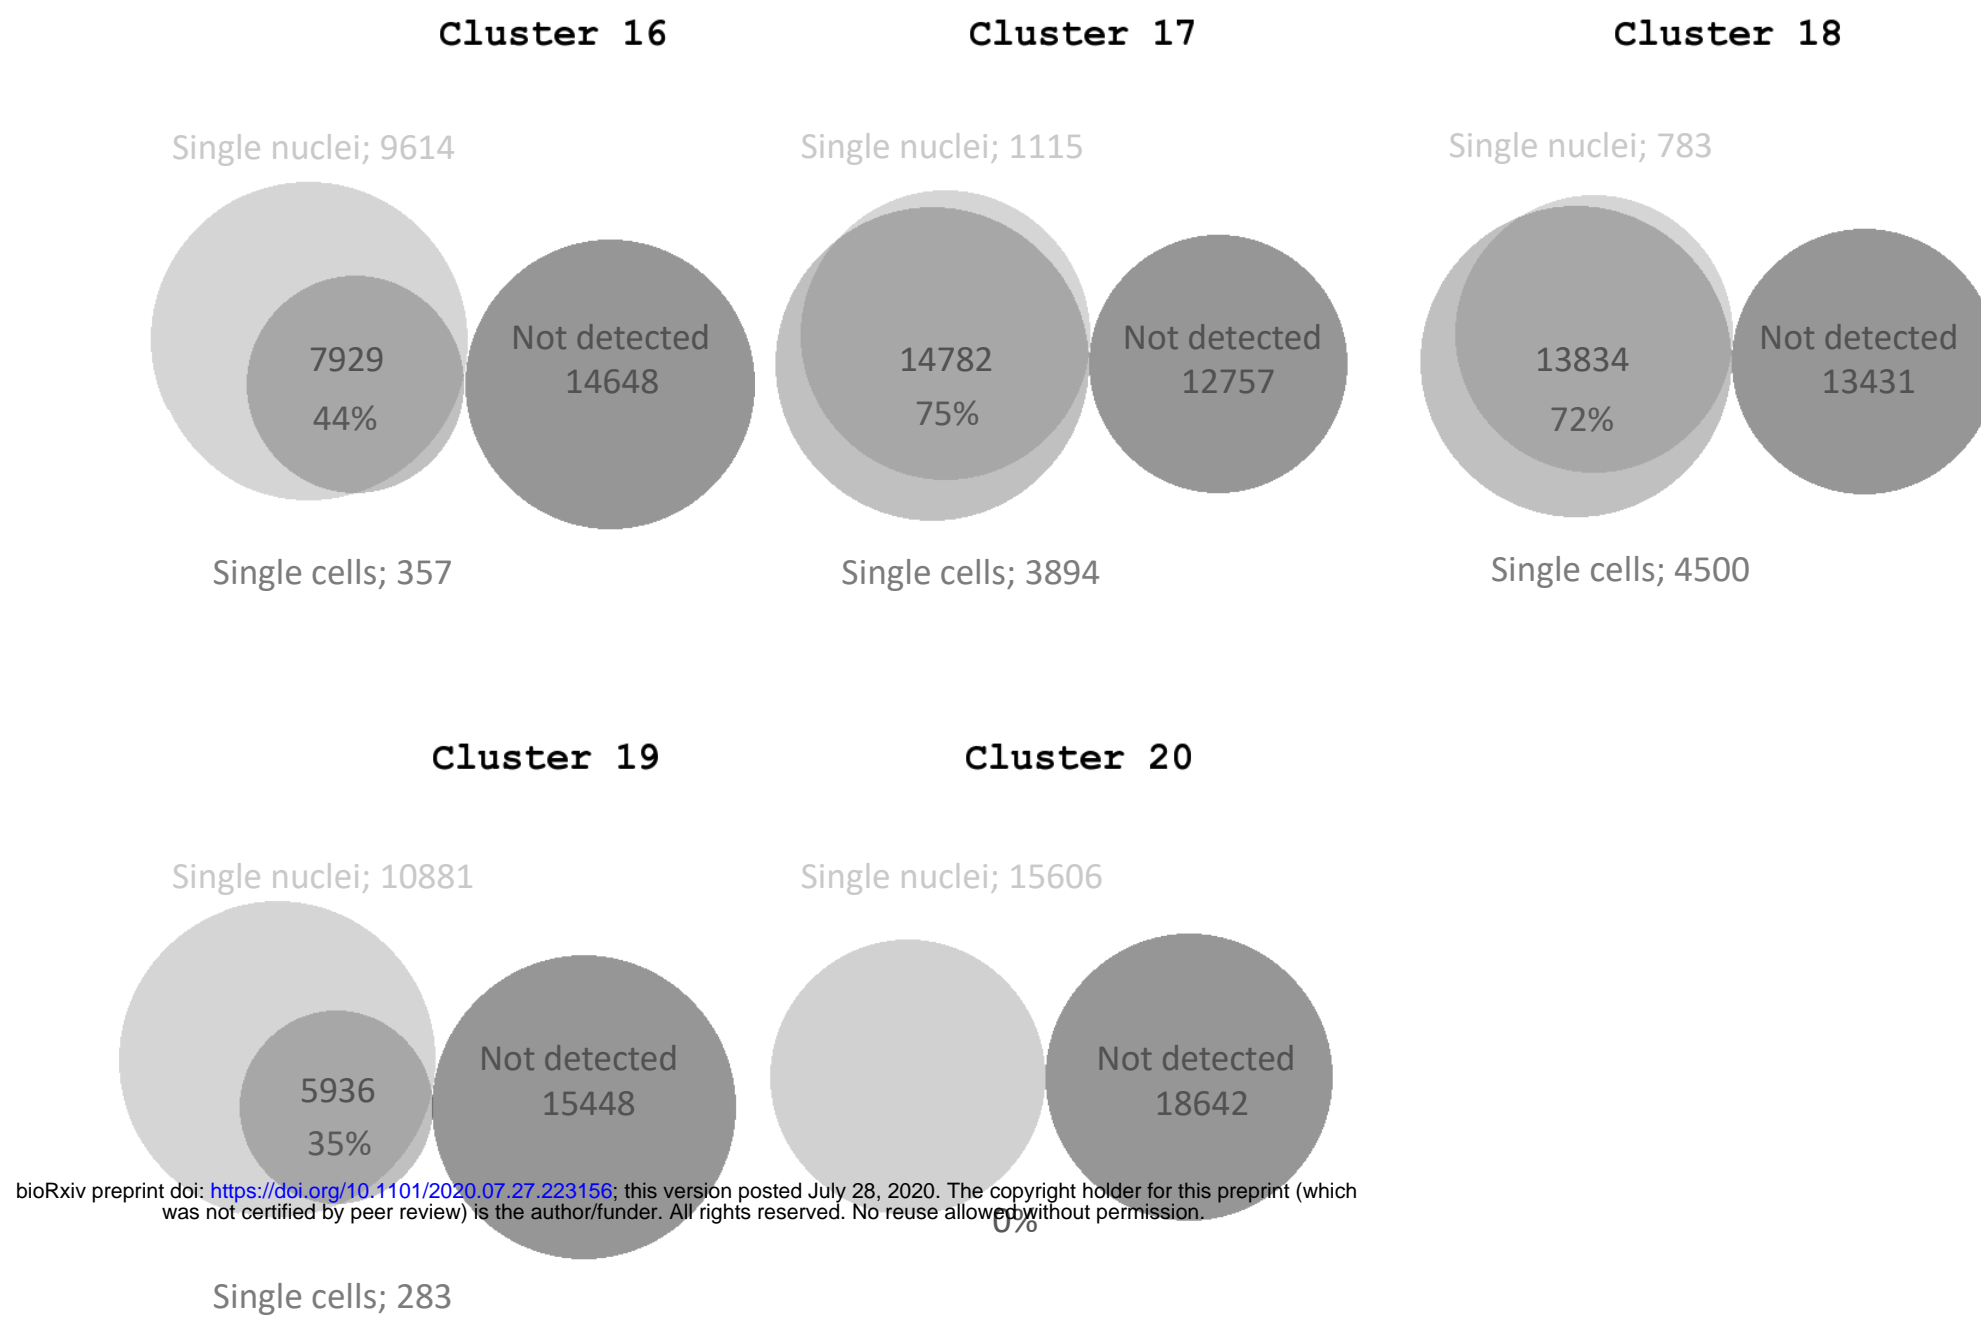

**Supplemental Figure 3.** Venn diagrams showing the number of expressed and non-expressed genes revealed upon applying sNucRNA-seq and sc-RNA-seq technologies. Not including clusters #16, 19 and 20, 80.2% of the expressed genes were identified by both technologies in average.

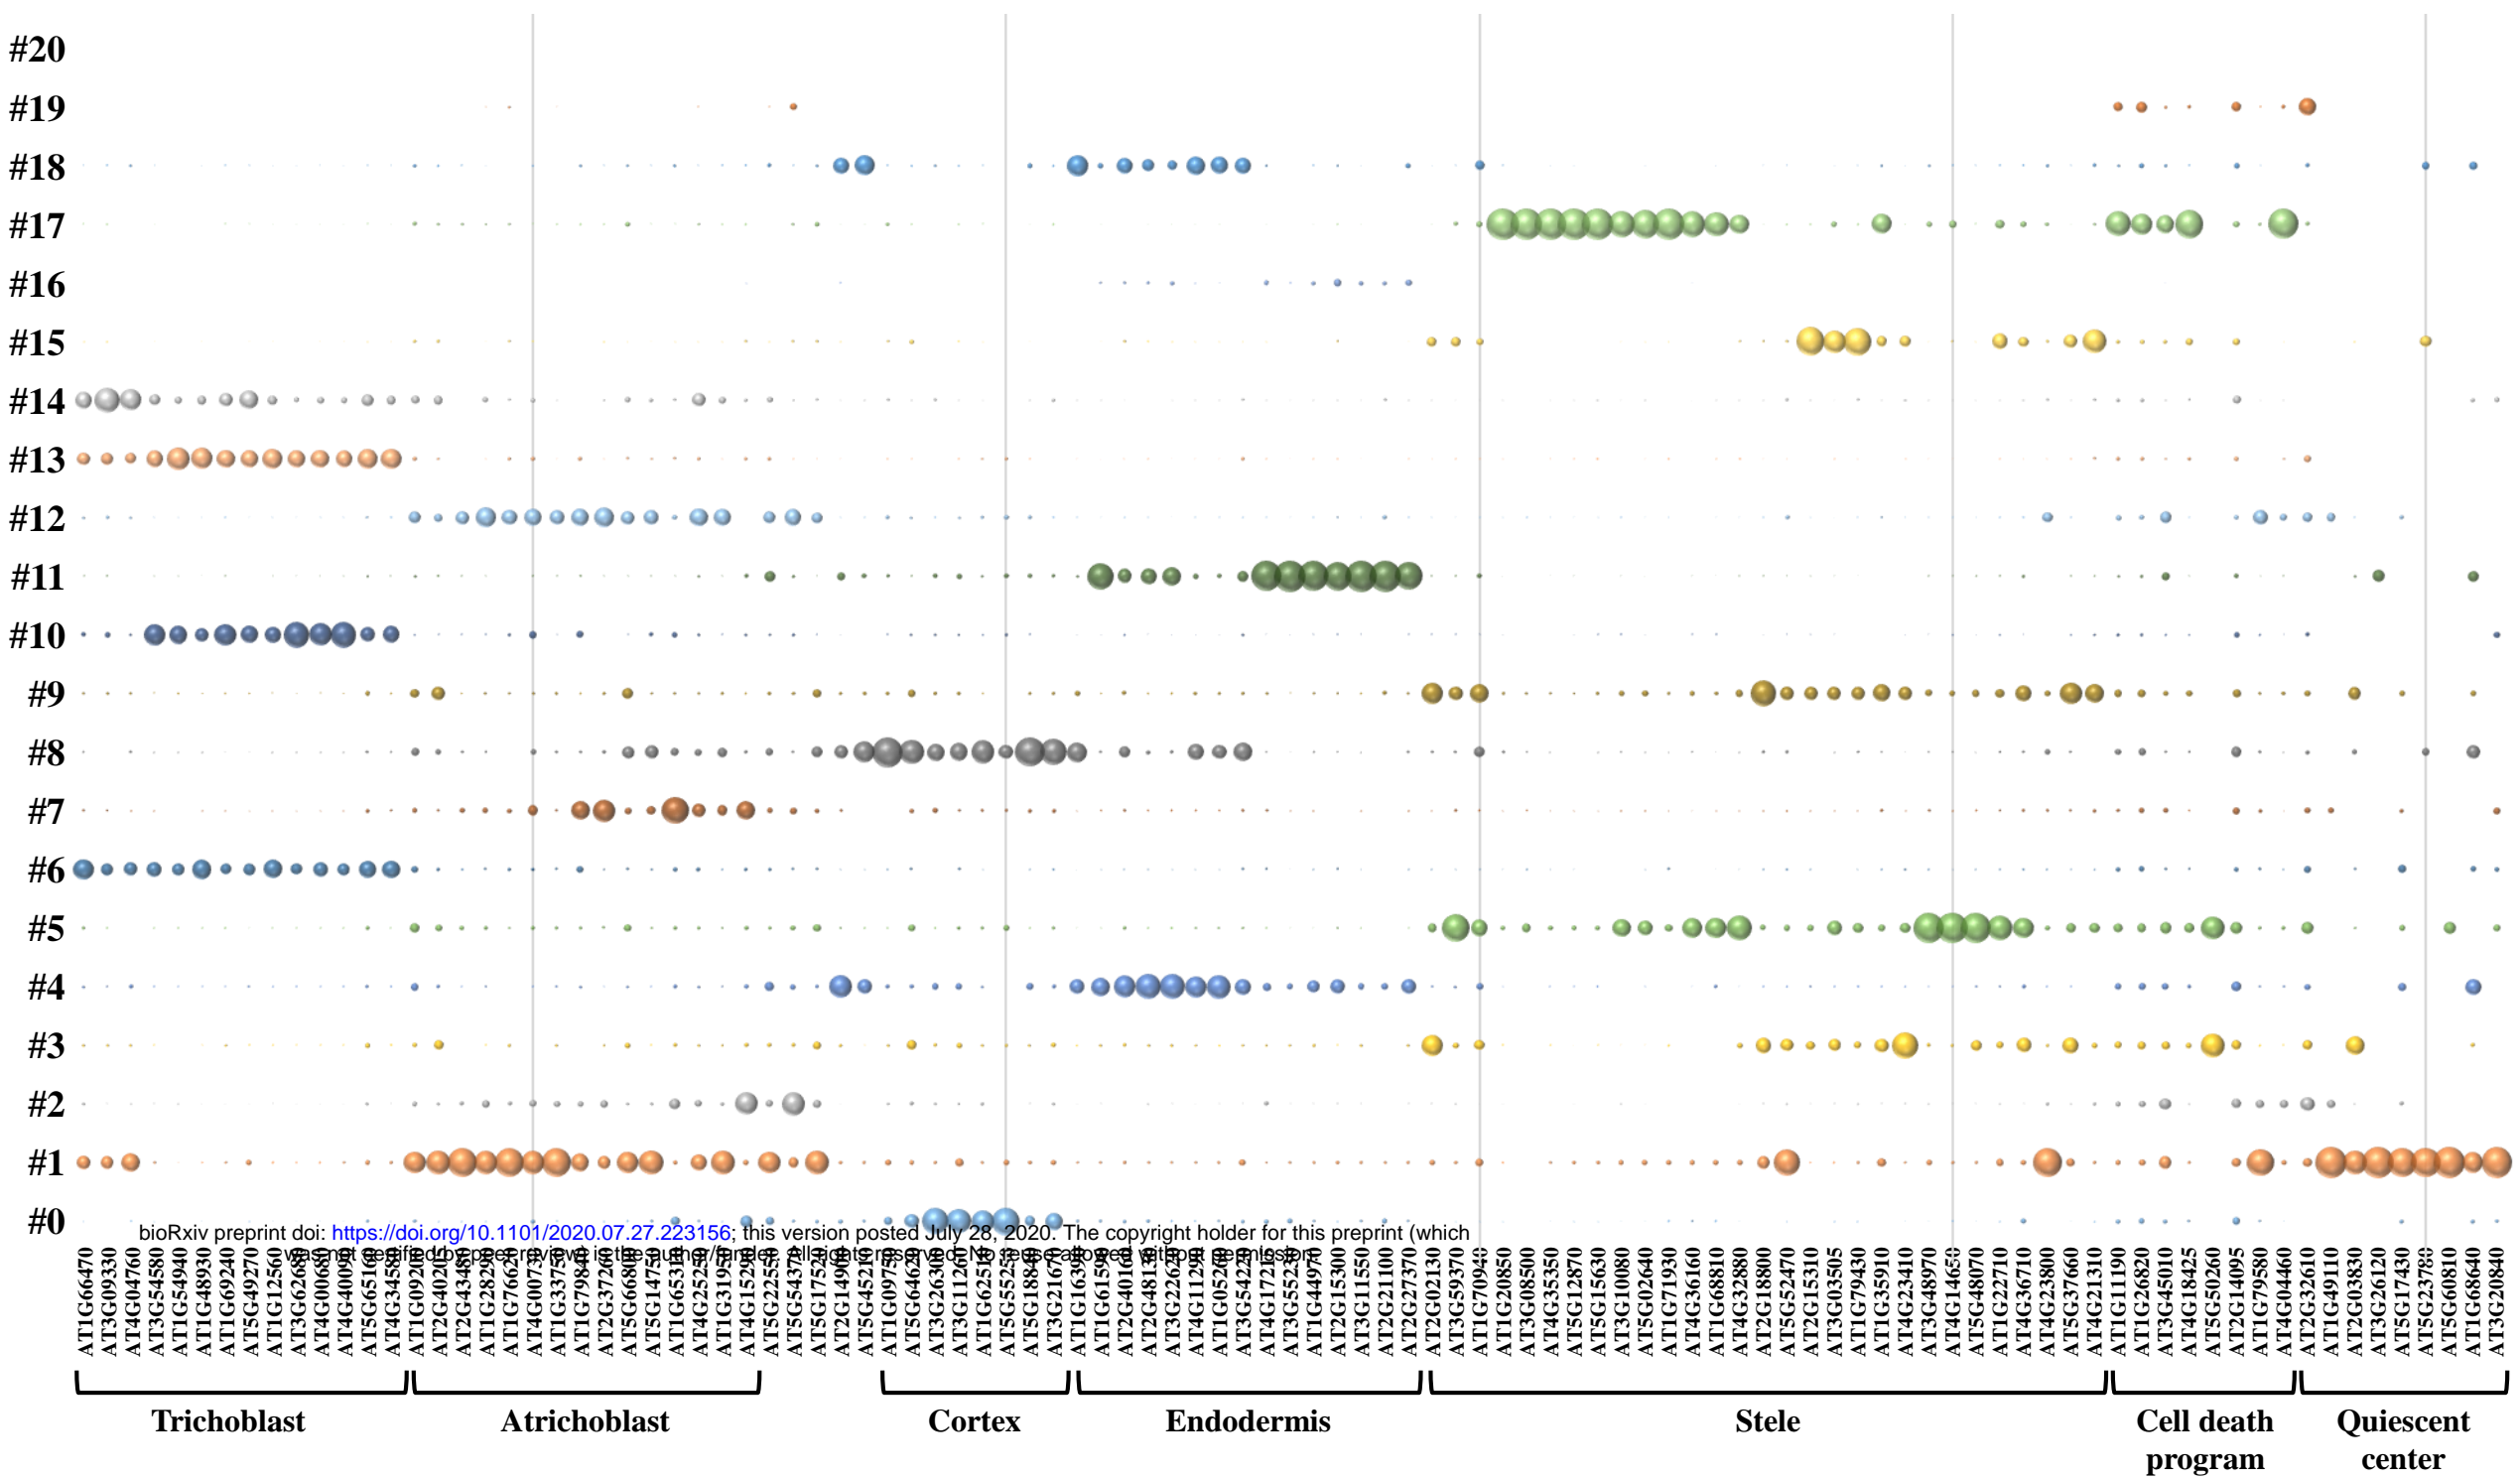

**Supplemental Figure 4.** Normalized expression level of 103 cell-type marker genes (x-axis) across the 21 different clusters (y-axis). scRNA-seq dataset mined from Ryu et al., 2019 [9] were used to create this figure. The diameter of each circle reflects the relative expression of the genes in each cell cluster.

## Endodermal marker genes

AT1G61590 (*PBL15*)

AT2G40160 (*TBL30*)

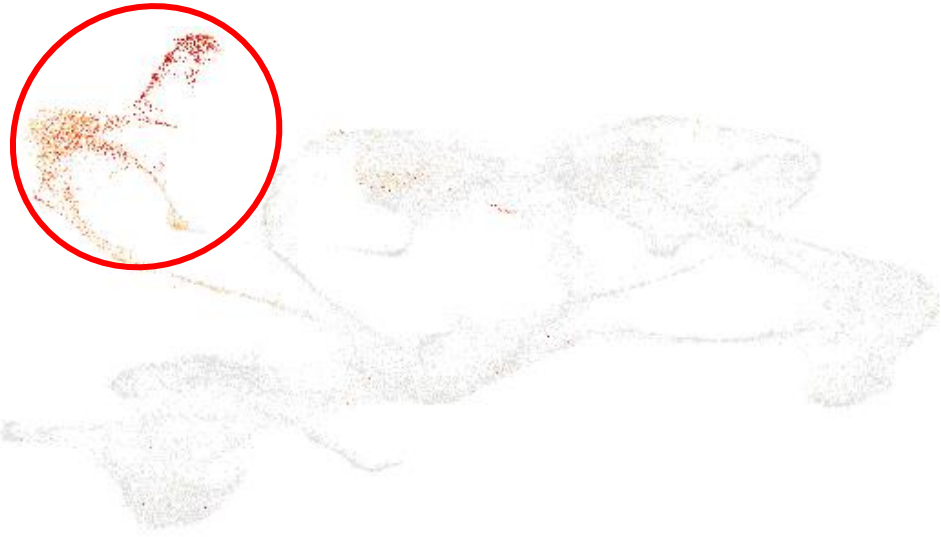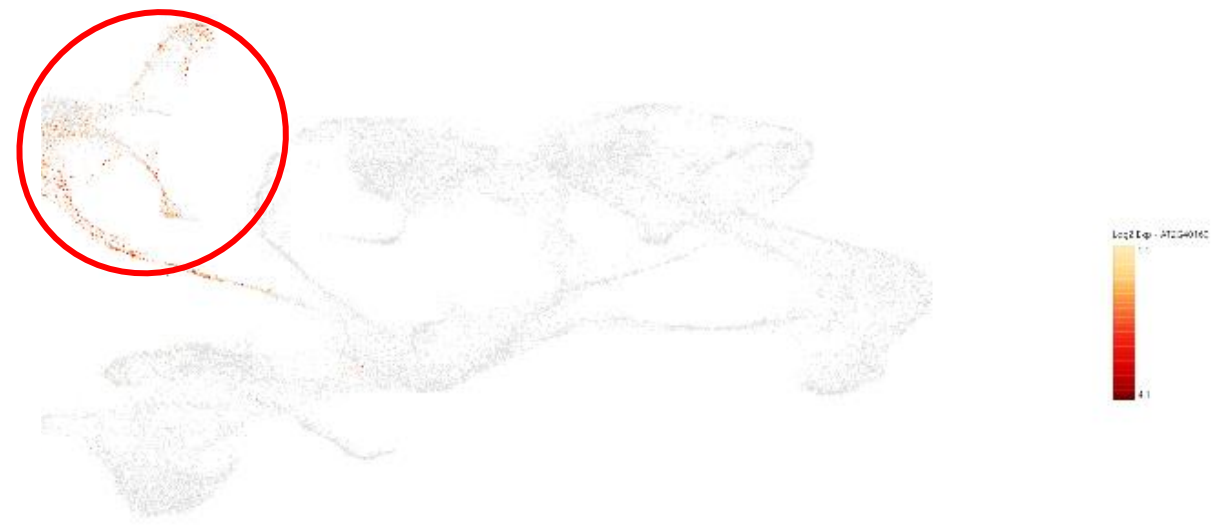

AT2G48130

AT4G17215

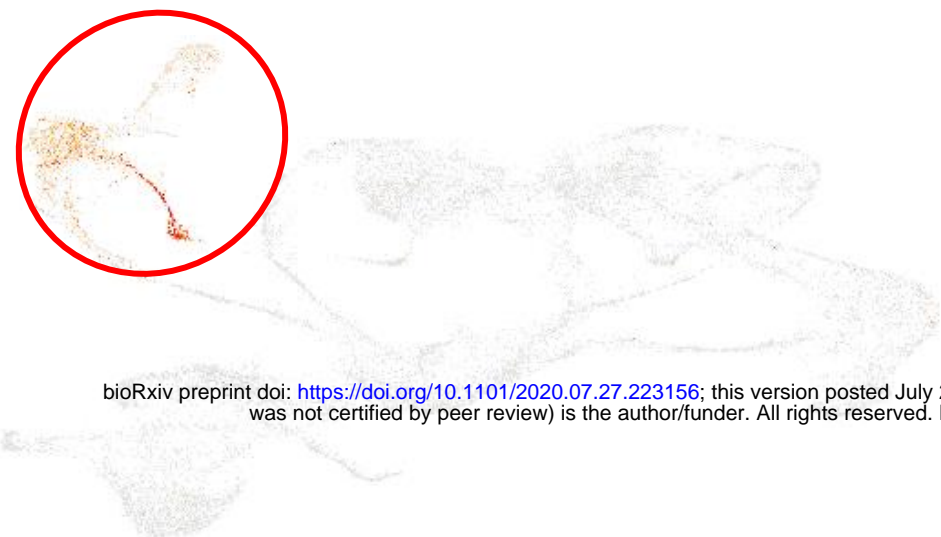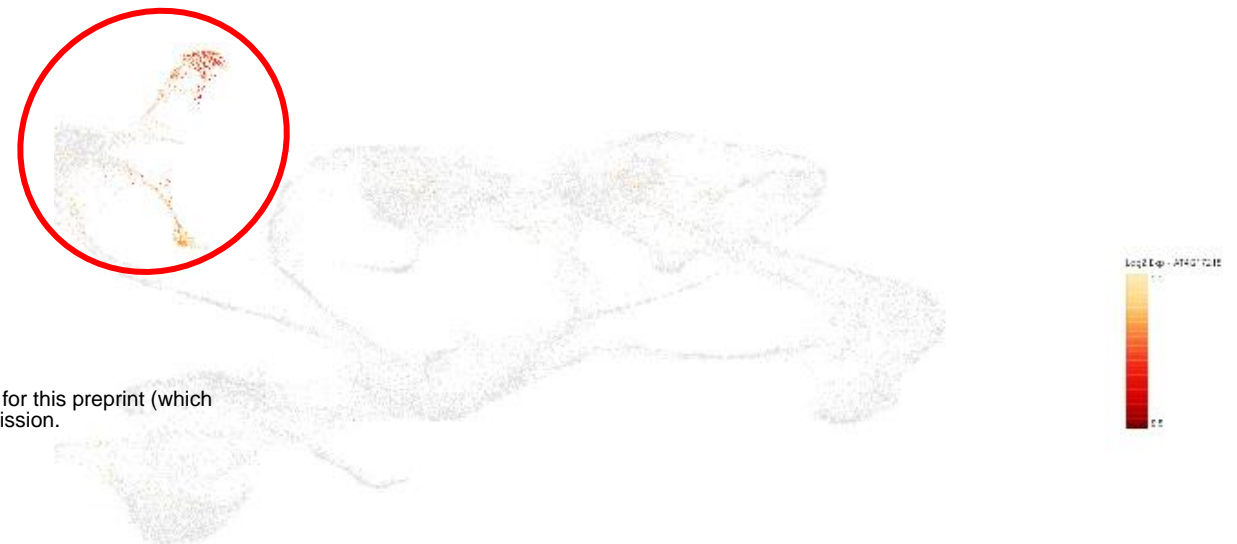

bioRxiv preprint doi: <https://doi.org/10.1101/2020.07.27.223156>; this version posted July 28, 2020. The copyright holder for this preprint (which was not certified by peer review) is the author/funder. All rights reserved. No reuse allowed without permission.

## Cortical marker genes

AT5G18840

AT3G21670

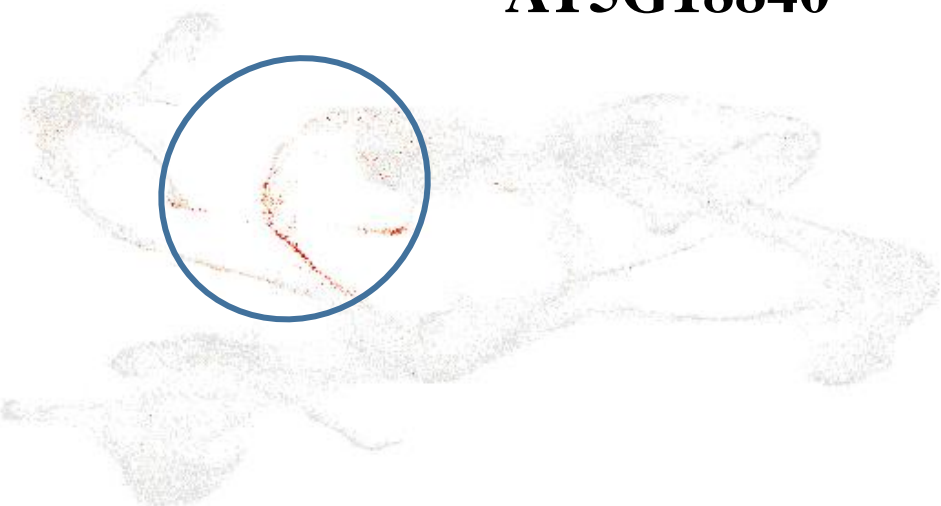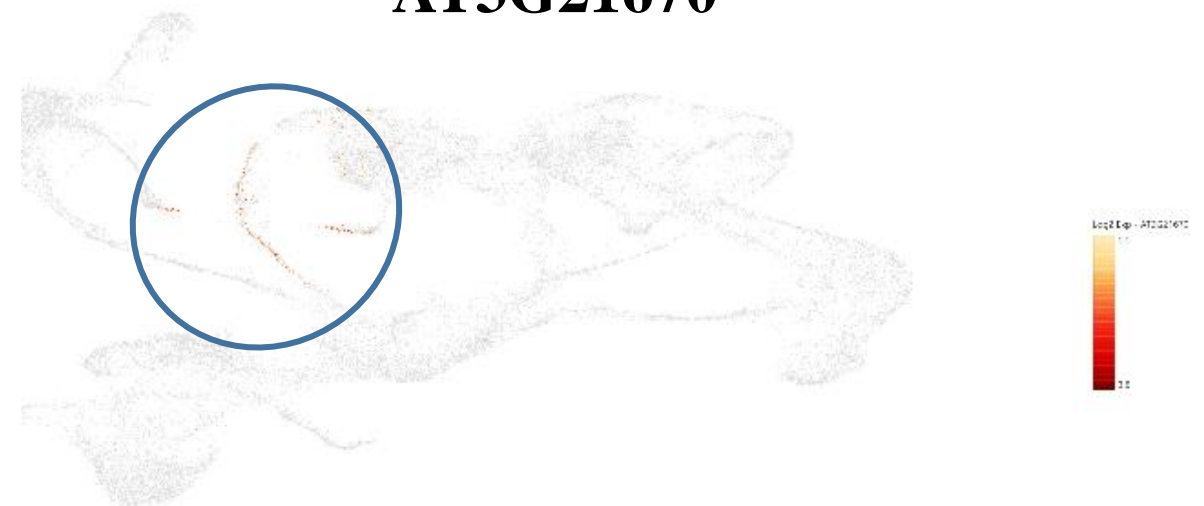

**Supplemental Figure 5.** Transcriptional patterns at the single cell level of Arabidopsis genes preferentially expressed in cluster #16. The relative levels of expression of the genes are highlighted in yellow/red color. Red and blue circles highlight the expression of endodermal and cortical marker genes. Blue arrows highlight the expression of gene encoding peroxidases, GDSL-motif esterases/acyltransferases/lipases and proteins involved in the biosynthesis of suberin and cutin. Black arrows highlight the absence of transcriptional activity of the *UPBEAT1* gene in the clusters # 10, 16, 19 and 20.



## Peroxidases

**AT1G68850**

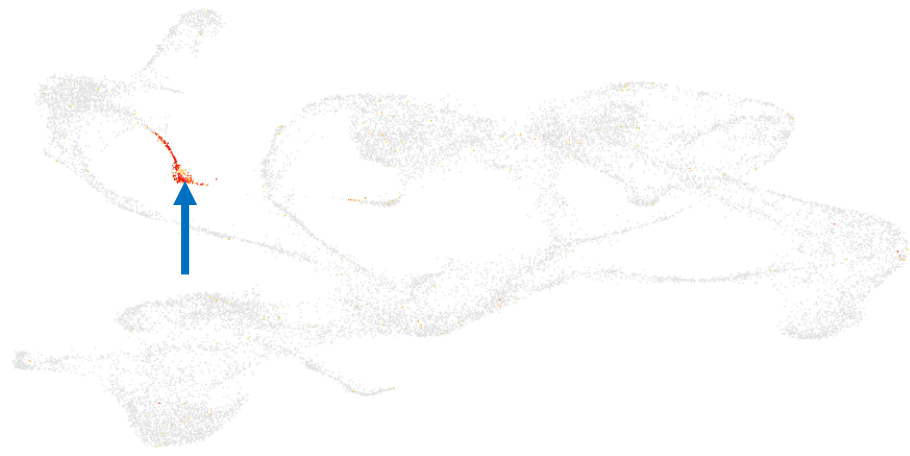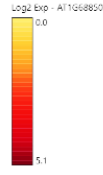

**AT2G35380**

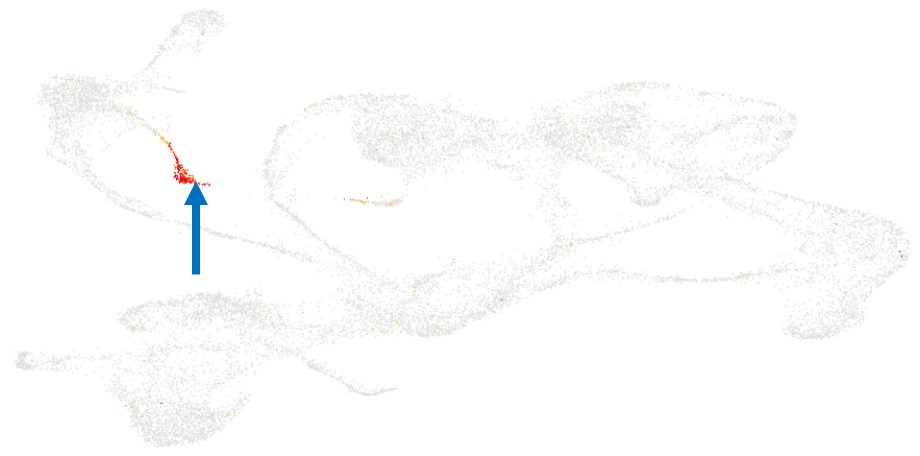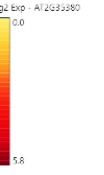

## GDSL-motif esterase/acyltransferase/lipase

**AT2G23540**

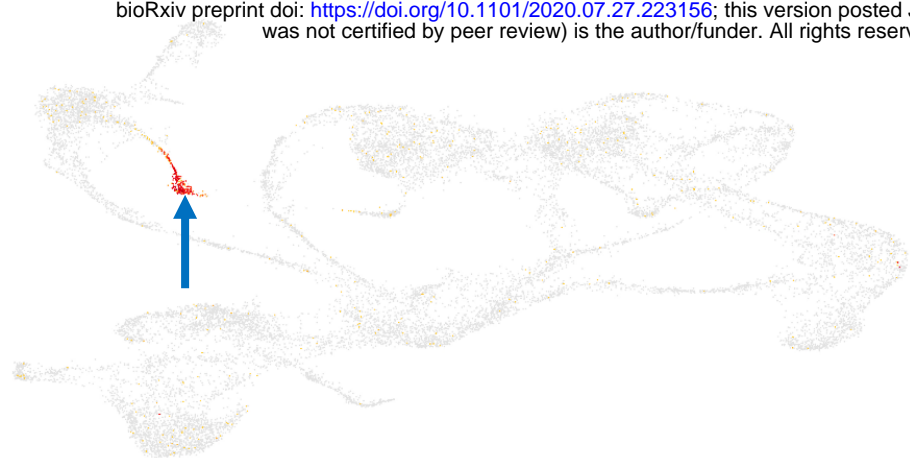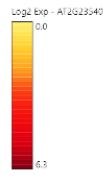

**AT5G37690**

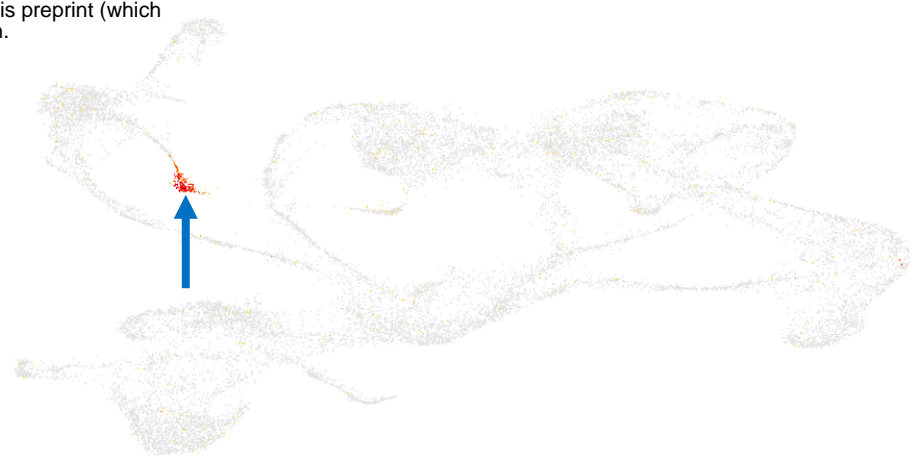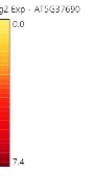

**AT1G74460**

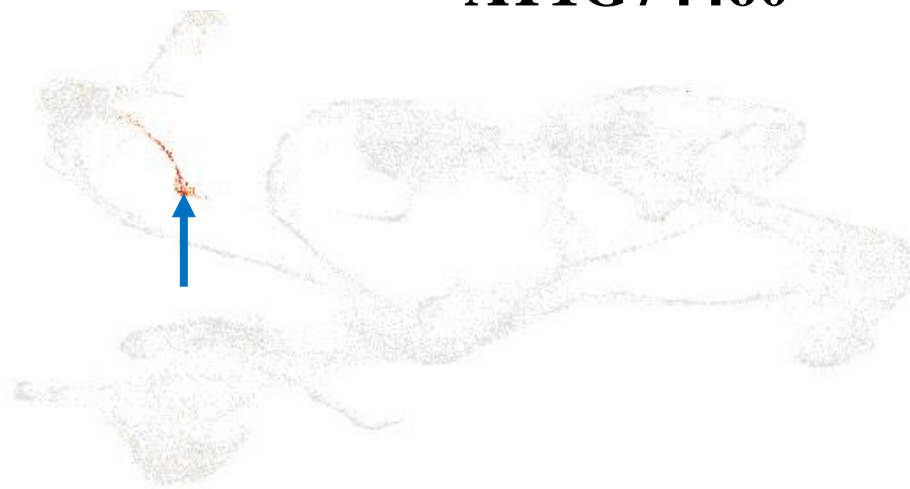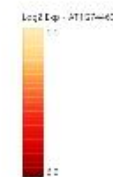

**AT2G47270 (*UPBEAT1*)**

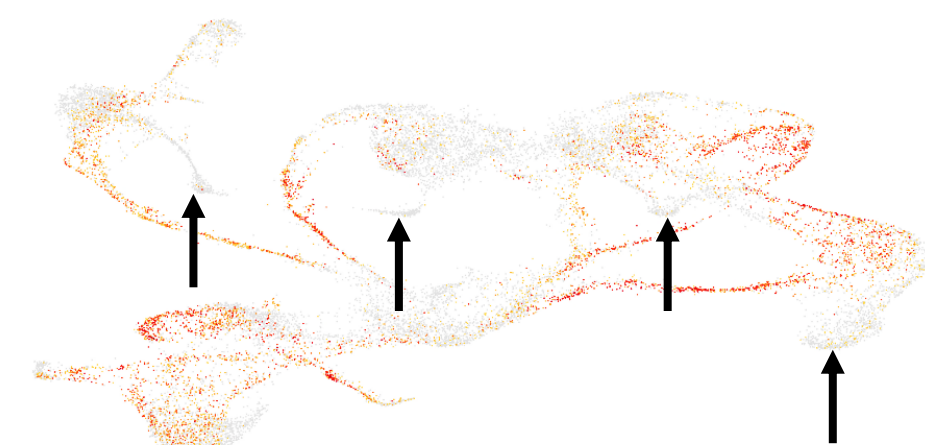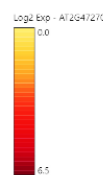

**Supplemental Figure 5.** Transcriptional patterns at the single cell level of Arabidopsis genes preferentially expressed in cluster #16. The relative levels of expression of the genes are highlighted in yellow/red color. Red and blue circles highlight the expression of endodermal and cortical marker genes. Blue arrows highlight the expression of gene encoding peroxydases, GDSL-motif esterases/acyltransferases/lipases and proteins involved in the biosynthesis of suberin and cutin. Black arrows highlight the absence of transcriptional activity of the *UPBEAT1* gene in the clusters # 10, 16, 19 and 20.

## Biosynthesis of suberin and cutin

**AT4G24140**

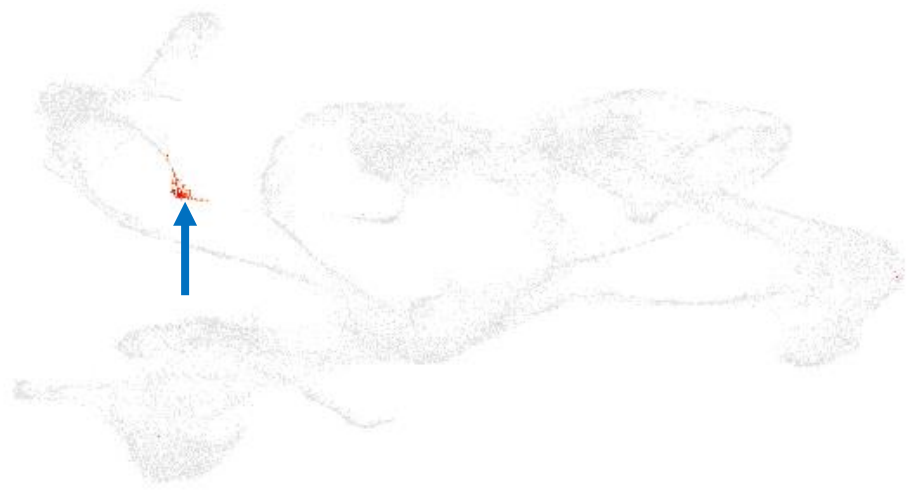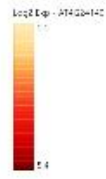

**AT3G11430 (*GPAT5*)**

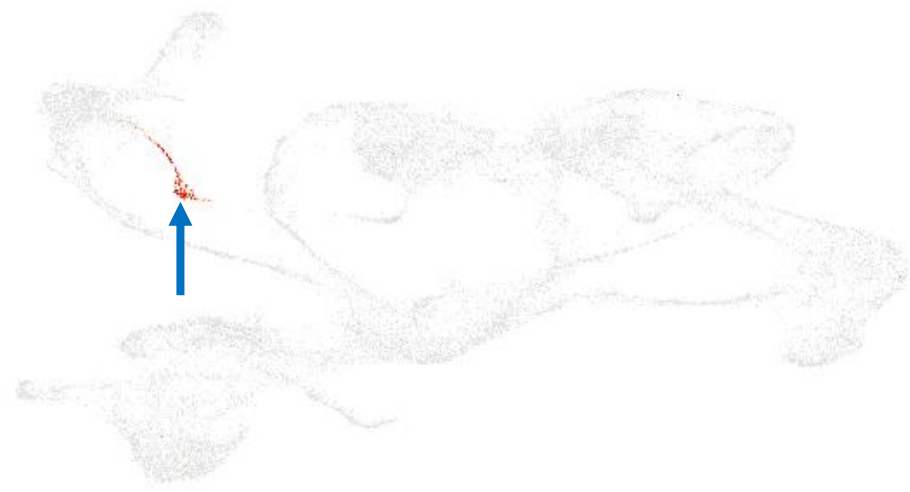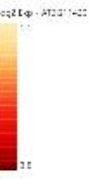

**AT1G49430**

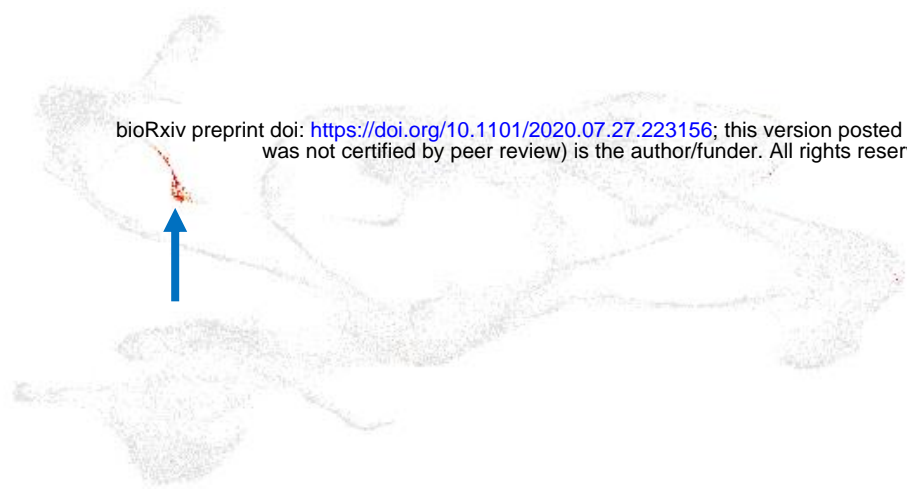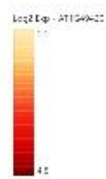

**AT2G38110**

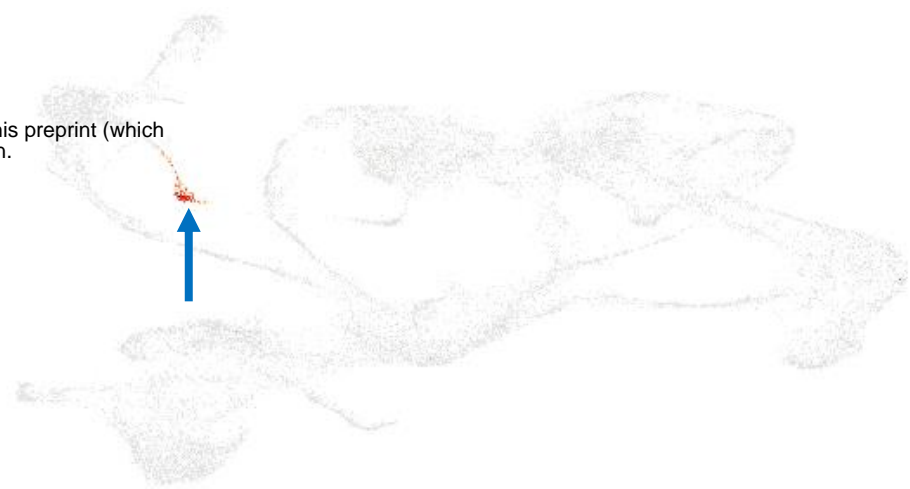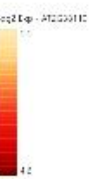

**AT1G01610 (*GPTA4*)**

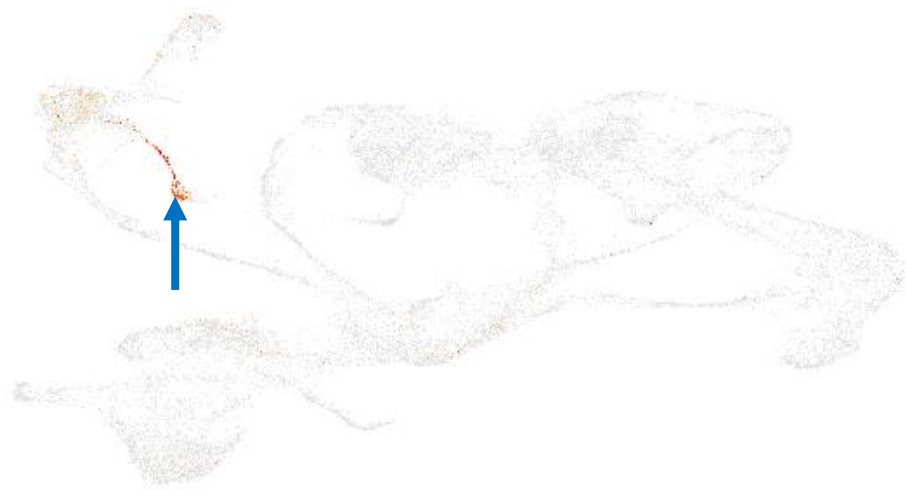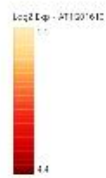

**AT4G00400 (*GPTA8*)**

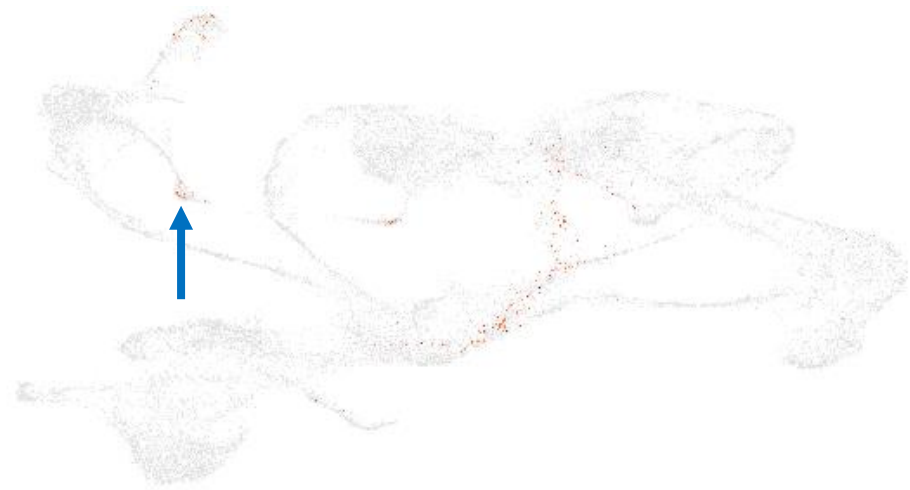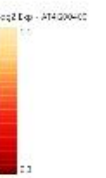

**Supplemental Figure 5.** Transcriptional patterns at the single cell level of Arabidopsis genes preferentially expressed in cluster #16. The relative levels of expression of the genes are highlighted in yellow/red color. Red and blue circles highlight the expression of endodermal and cortical marker genes. Blue arrows highlight the expression of gene encoding peroxydases, GDSL-motif esterases/acyltransferases/lipases and proteins involved in the biosynthesis of suberin and cutin. Black arrows highlight the absence of transcriptional activity of the *UPBEAT1* gene in the clusters # 10, 16, 19 and 20.

**AT5G50260 (*CEP1*)**

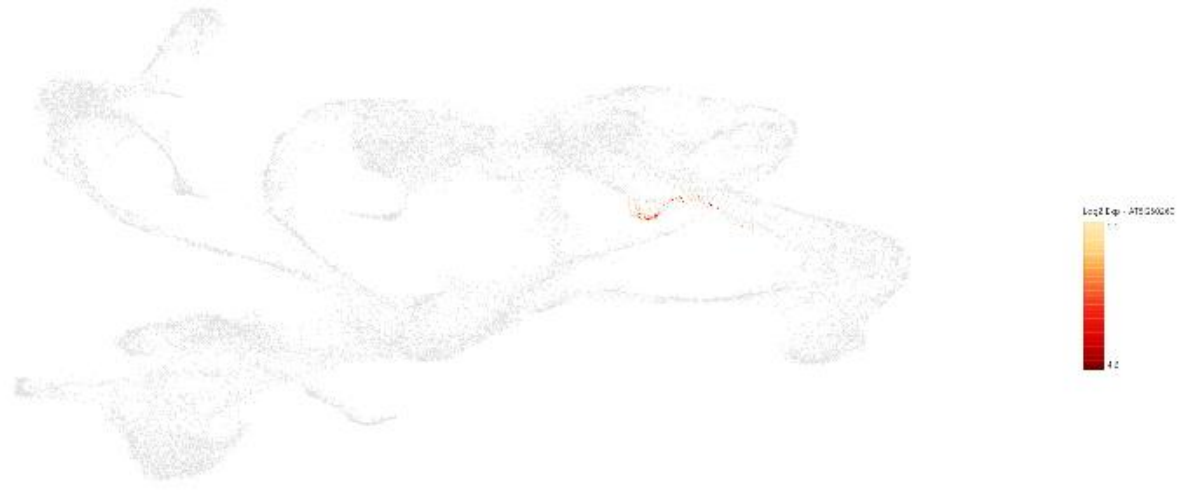

**AT2G14095 (*EX11*)**

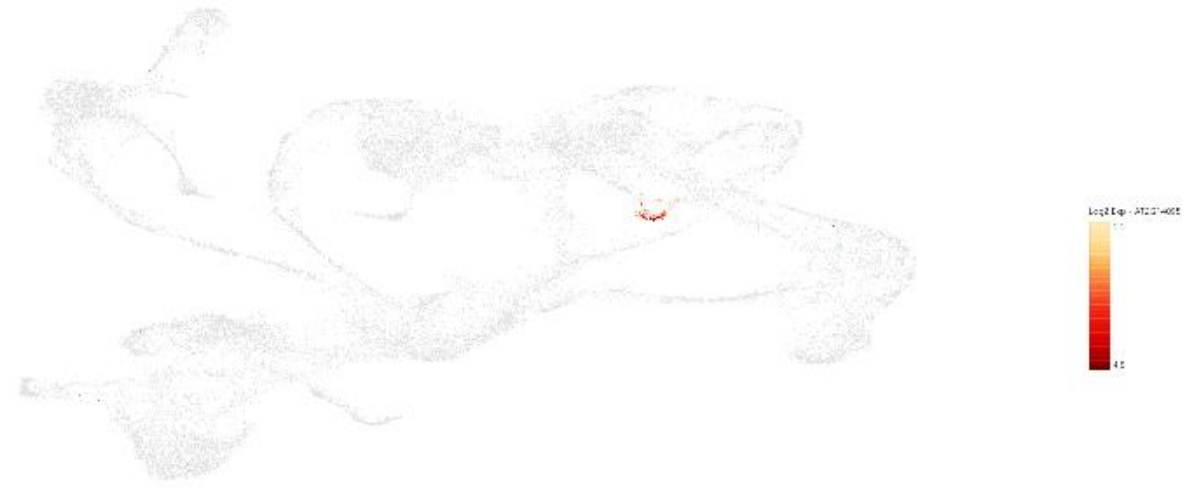

**AT4g28530 (*KIRA1*)**

bioRxiv preprint doi: <https://doi.org/10.1101/2020.07.27.223156>; this version posted July 28, 2020. The copyright holder for this preprint (which was not certified by peer review) is the author/funder. All rights reserved. No reuse allowed without permission.

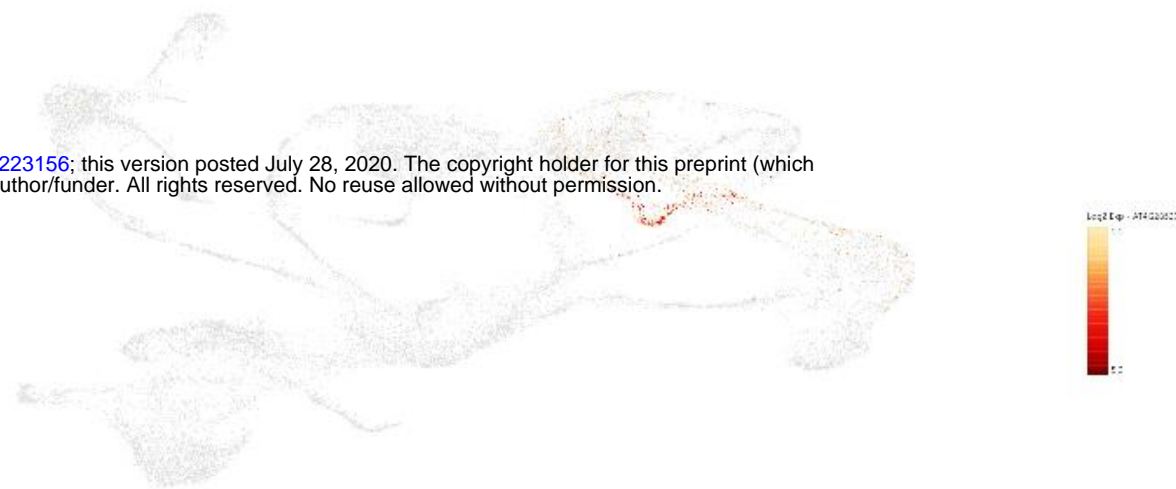

**$\alpha/\beta$  hydrolases**

**AT4G18550**

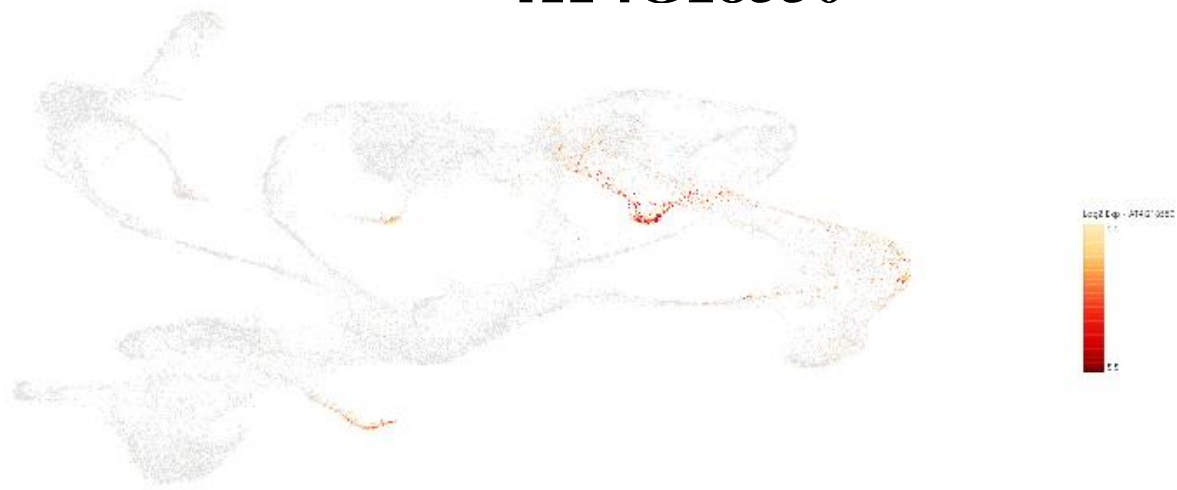

**AT1G73750**

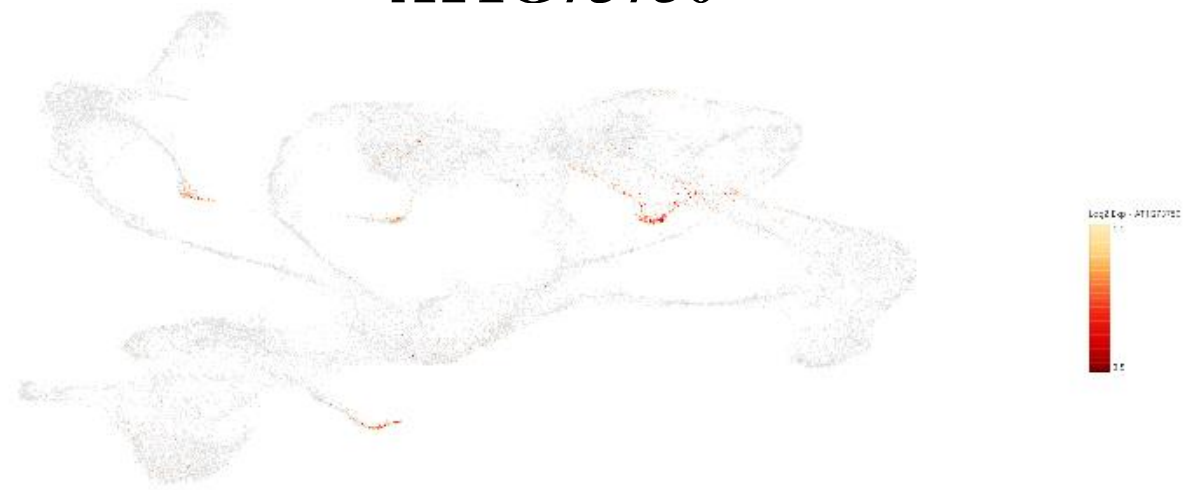

**Supplemental Figure 6.** Transcriptional patterns of the Arabidopsis *CEP1* (AT5G50260), *EX11* (AT2G14095), and *KIRA1* (AT4G28530) genes in isolated Arabidopsis nuclei (B). These genes control the cell death program notably in the root cap. The expression profile of two  $\alpha/\beta$  hydrolases potentially involved in suberin/cutin biosynthesis is also highlighted. The relative levels of expression of the genes are highlighted in yellow/red color.



# SCRAMBLED/STRUBBELIG AT1G11130

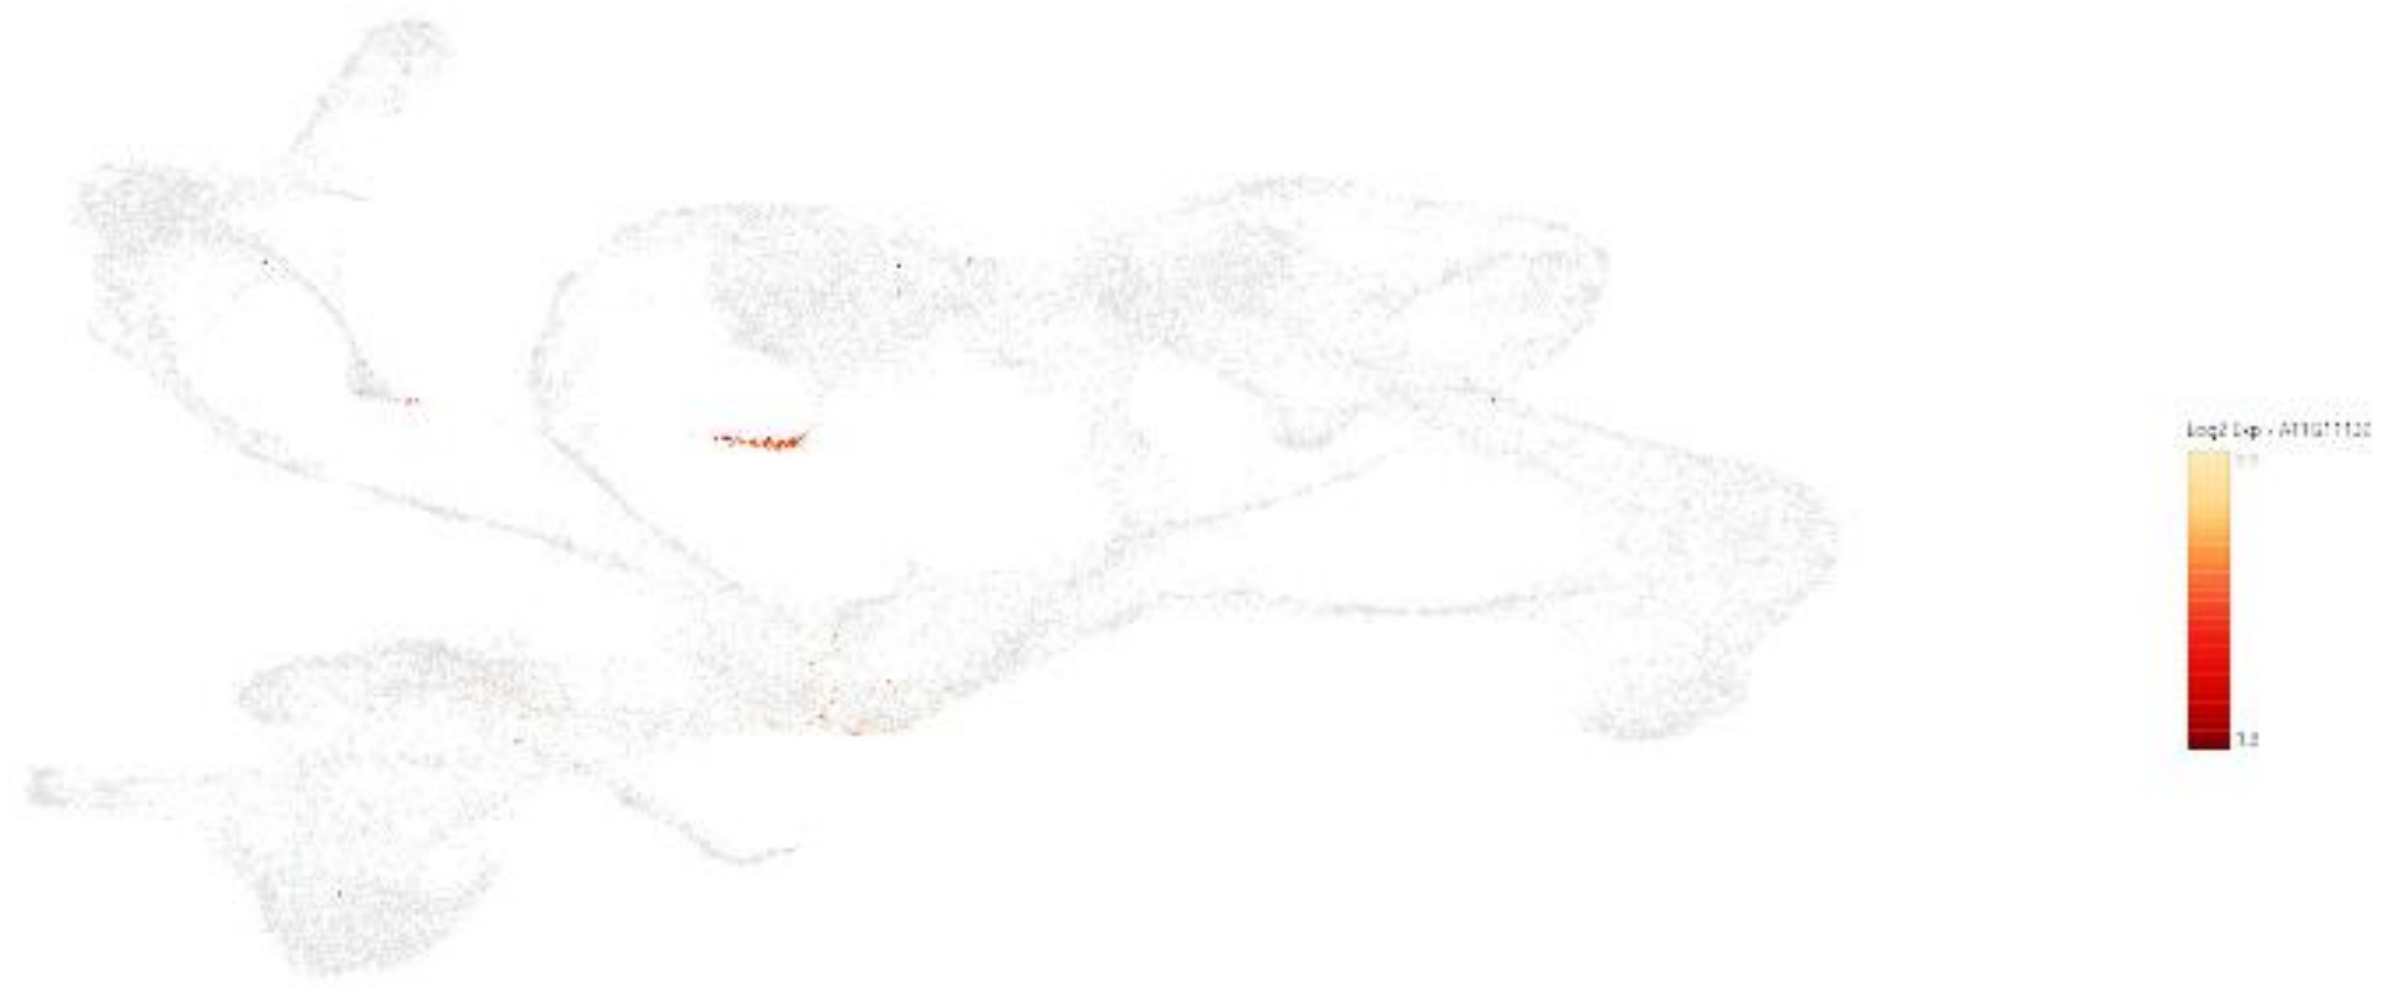

bioRxiv preprint doi: <https://doi.org/10.1101/2020.07.27.223156>; this version posted July 28, 2020. The copyright holder for this preprint (which was not certified by peer review) is the author/funder. All rights reserved. No reuse allowed without permission.

## NPF6.4/NRT1.3

### AT5G18840

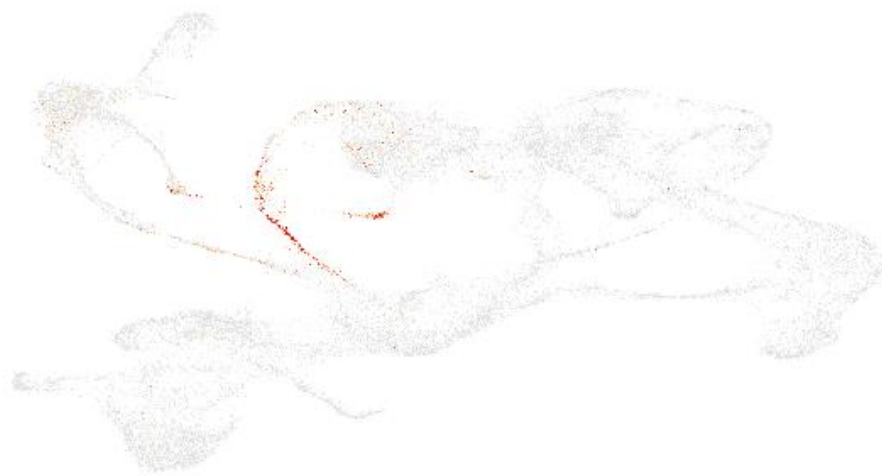

### AT3G21670

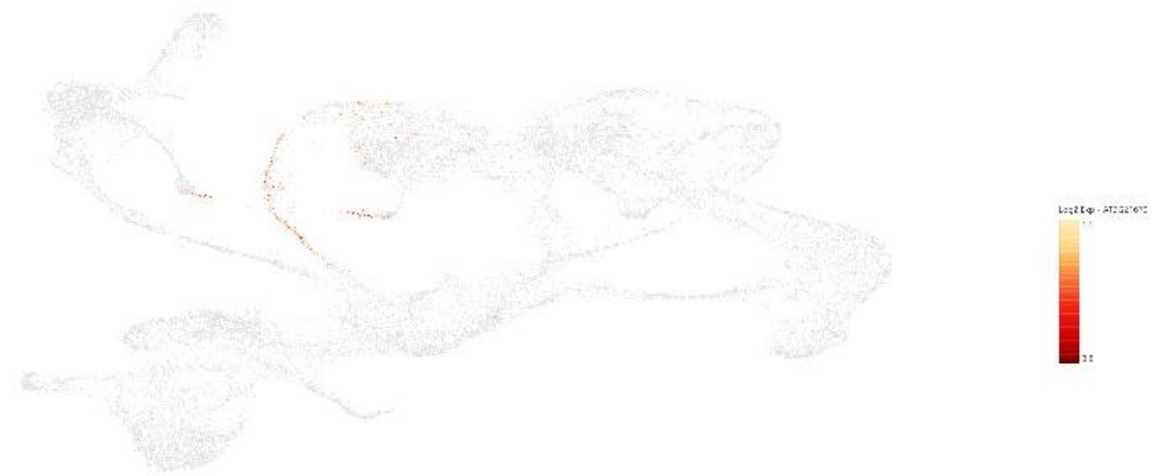

### HXXXD-type acyl-transferase AT5G63560

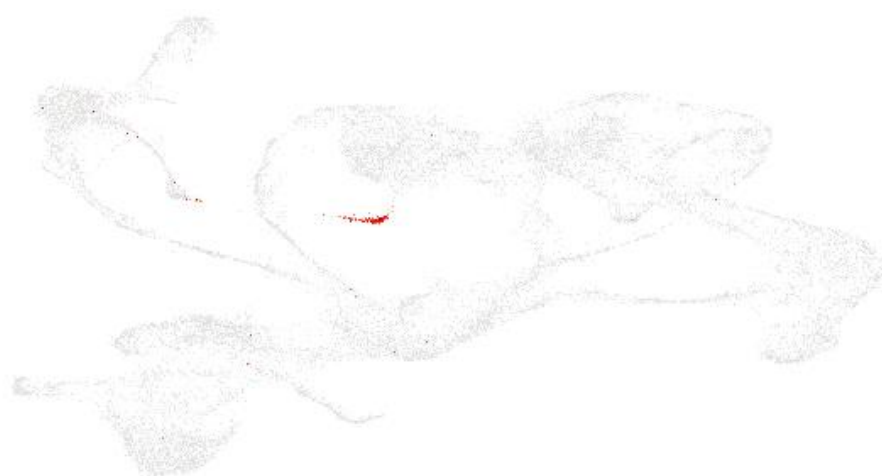

### Triacylglycerol lipase-like 1 AT1G45201

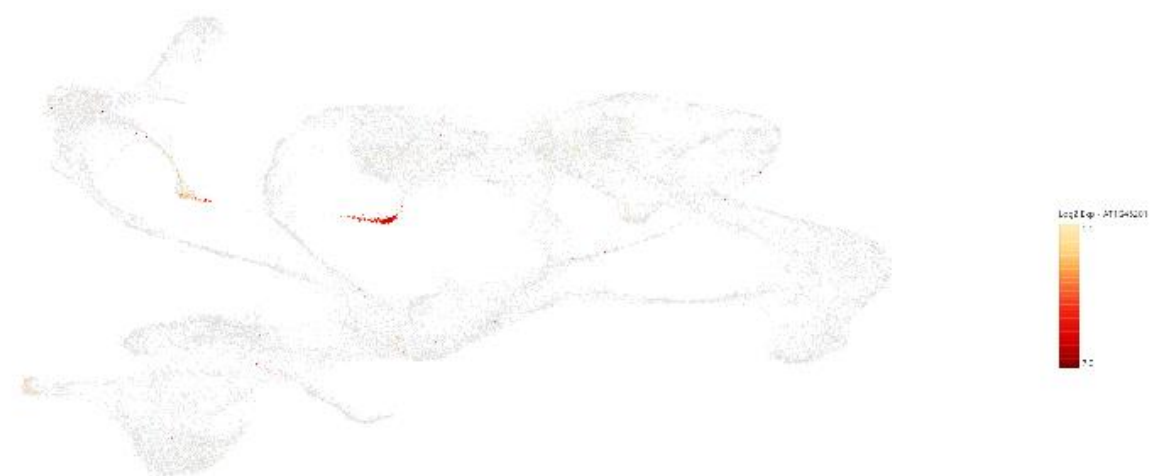

**Supplemental Figure 7.** Transcriptional patterns of the Arabidopsis *SCRAMBLED/STRUBBELIG* (*SCM*, AT1G11130) gene, two *NPF6.4/NRT1.3* genes, and couple additional marker genes of this cluster playing a role in root hair cell differentiation. The relative levels of expression of the genes in isolated Arabidopsis nuclei are highlighted in yellow/red color. *SCM* was mostly expressed in cluster #20, a cell cluster exclusively identified by applying sNucRNA-seq technology. In protoplast, the expression levels of these genes are limited to few cells.



snRNA-seq

At5g65670

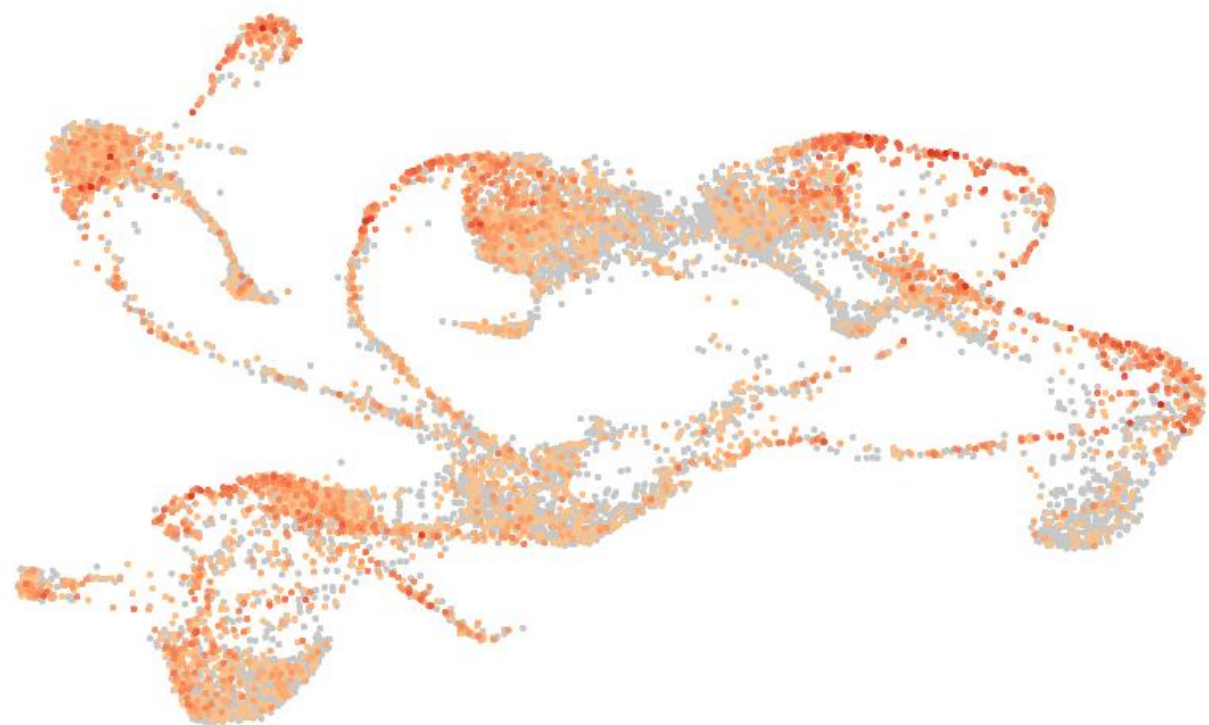

Ubiquitously expressed gene

IAA inducible 9

bioRxiv preprint doi: <https://doi.org/10.1101/2020.07.27.223156>; this version posted July 28, 2020. The copyright holder for this preprint (which was not certified by peer review) is the author/funder. All rights reserved. No reuse allowed without permission.

snATAC-seq

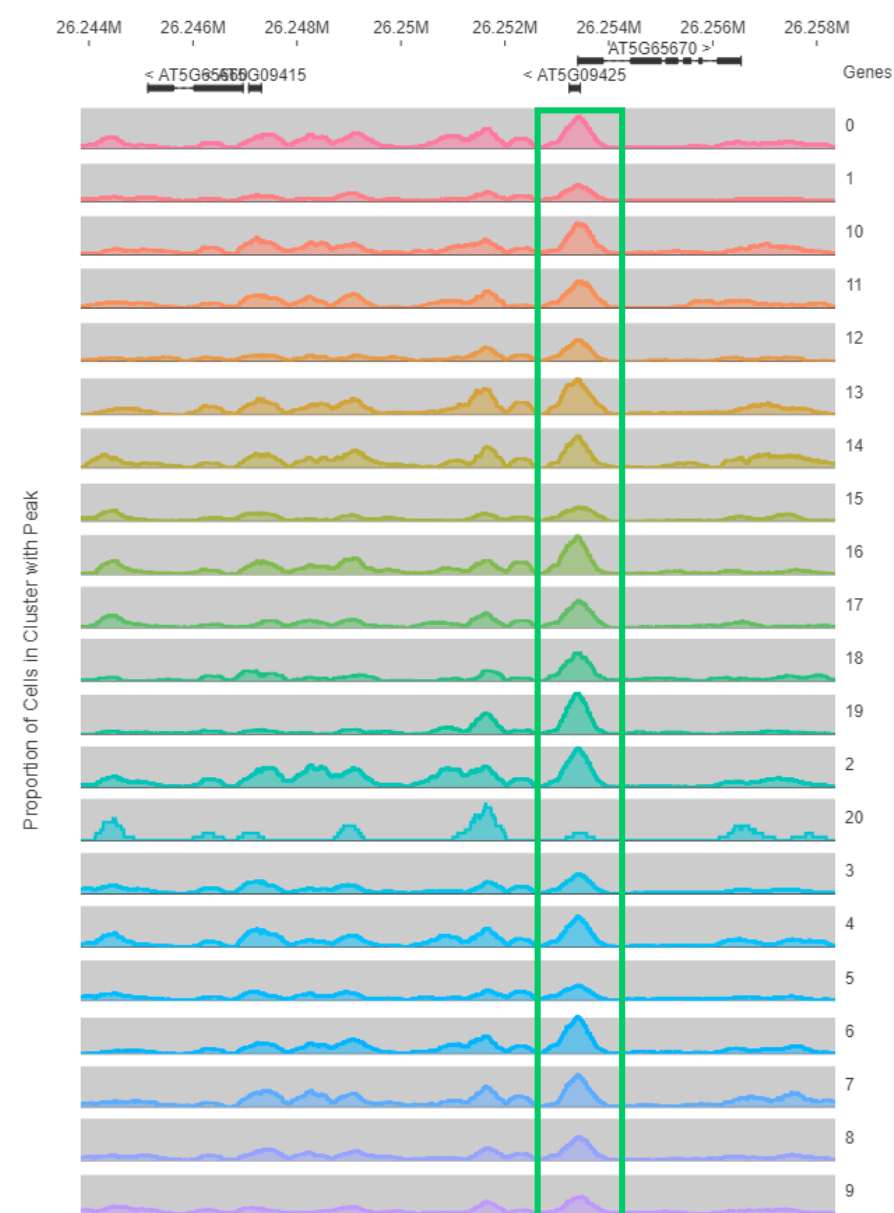

snRNA-seq

At5g65590

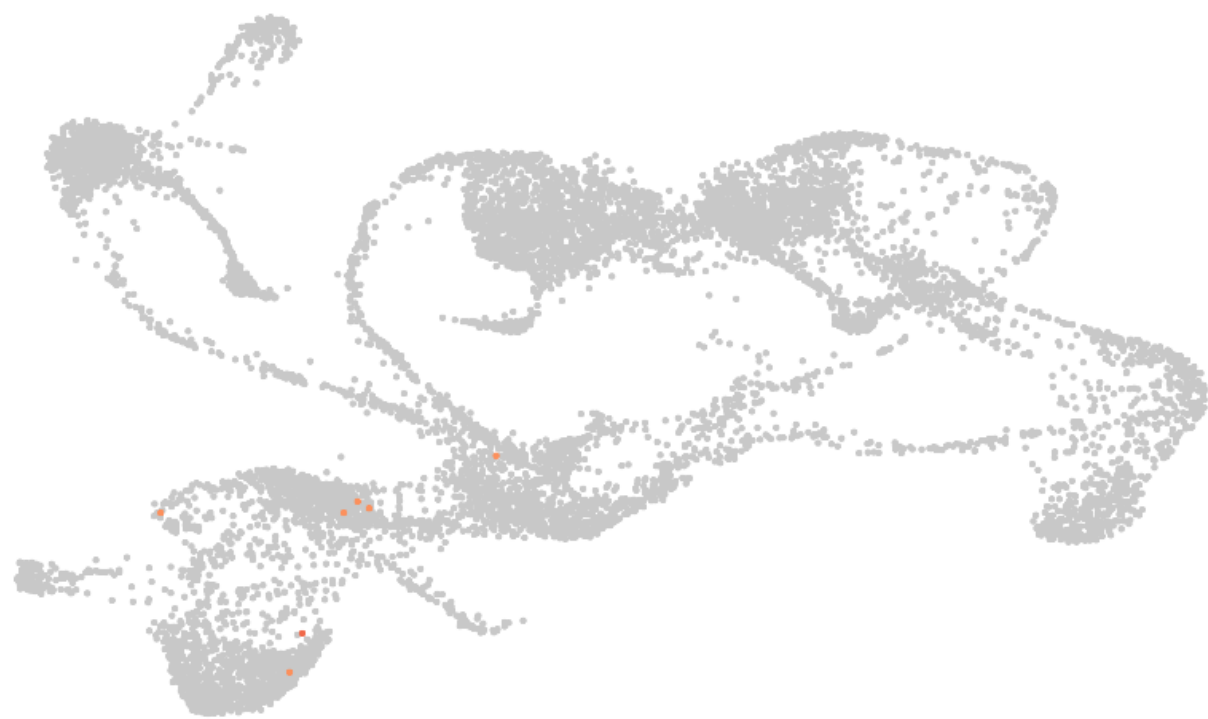

No expression in root cells

Dof-type transcription factor gene  
controlling stomatal guard cell maturation

snATAC-seq

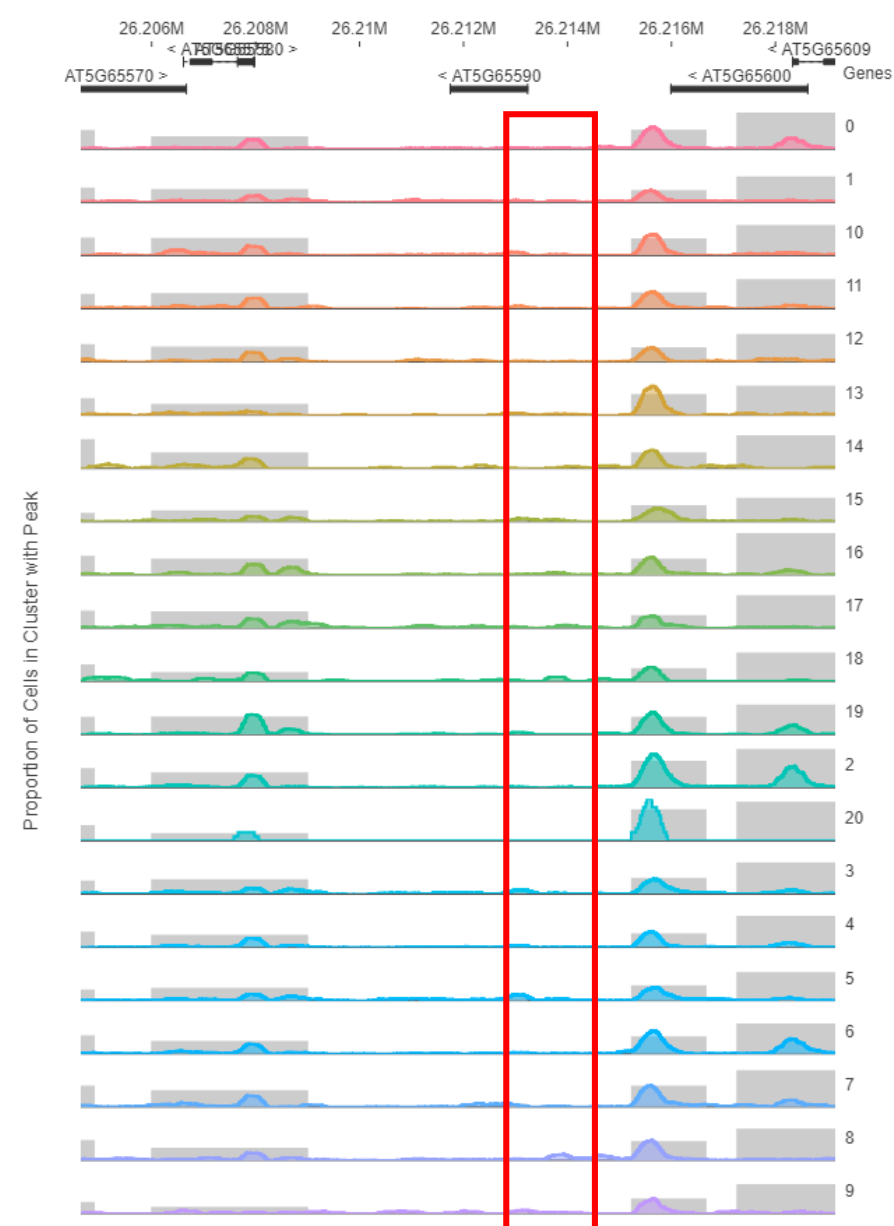

**Supplemental Figure 8.** Comparative analysis of the expression profile and chromatin folding of selected Arabidopsis genes. The left panels highlight the transcriptional activity of selected genes according to sc/sNucRNA-seq datasets (The relative levels of expression of the genes are highlighted in yellow/red color). When relevant, green arrows highlight the clusters where a gene was specifically expressed. The cluster number is indicated for information near to the arrow (see Figure 2A for the annotation of the 21 clusters). The right panels highlight the presence of sNucATAC-seq peaks nearby the TSS of the selected genes. The sc/sNucRNA-seq and sNucATAC-seq clusters are co-annotated to facilitate the comparative analysis. Green boxes and circles highlight major sNucATAC-seq peaks. Regarding At5g65590, a gene not expressed in any root cell type, the red box highlights the lack of open chromatin across the 21 sNucATAC-seq clusters.

snRNA-seq

At5g04080

snATAC-seq

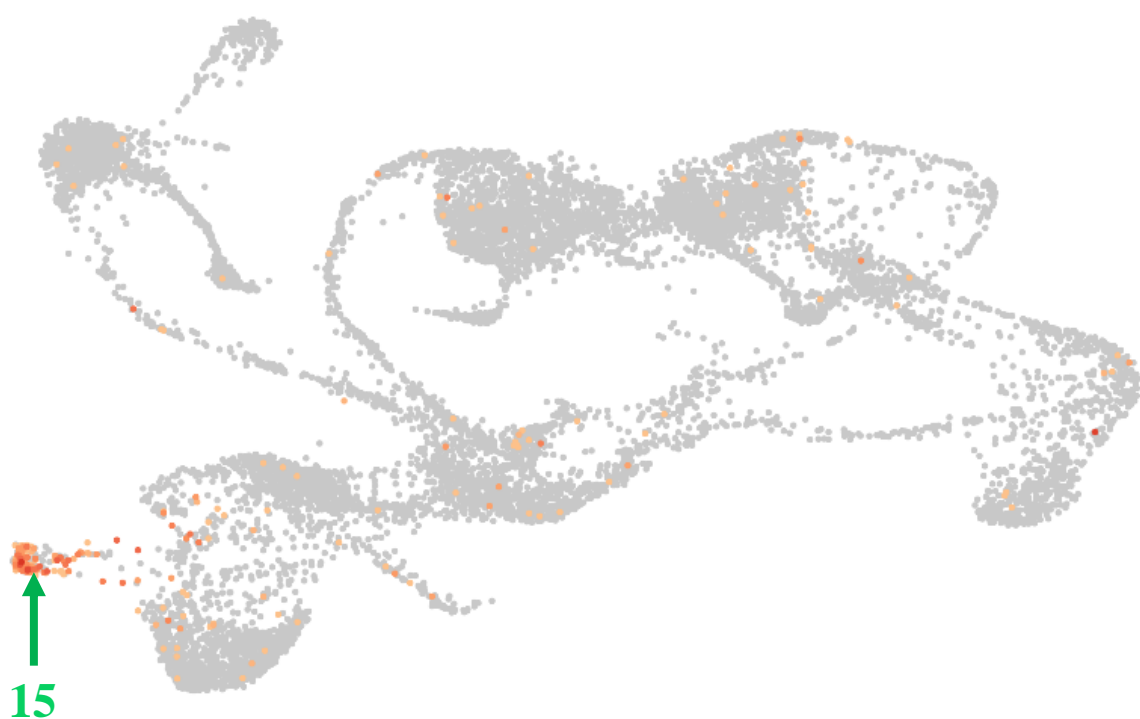

Phloem-specific gene

cysteine-rich TM module stress  
tolerance protein

bioRxiv preprint doi: <https://doi.org/10.1101/2020.07.27.223156>; this version posted July 28, 2020. The copyright holder for this preprint (which was not certified by peer review) is the author/funder. All rights reserved. No reuse allowed without permission.

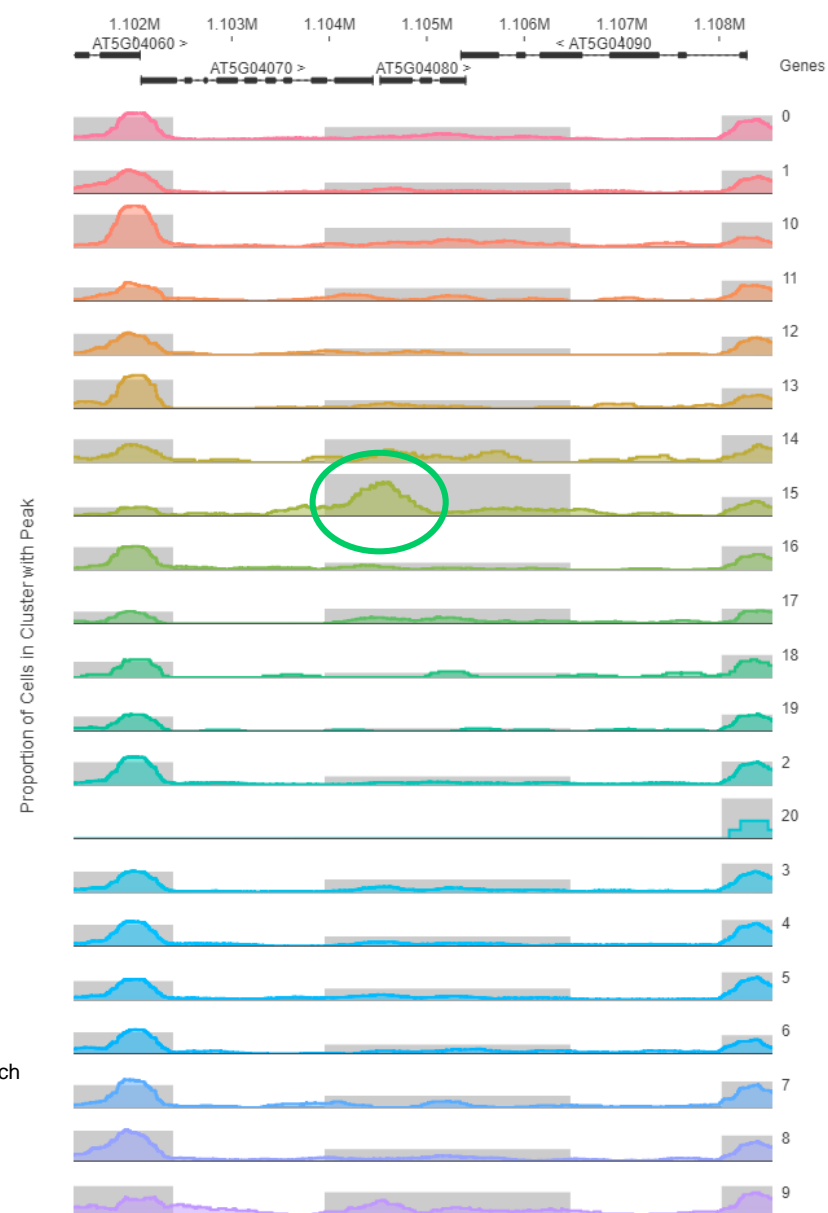

snRNA-seq

At5g63850

snATAC-seq

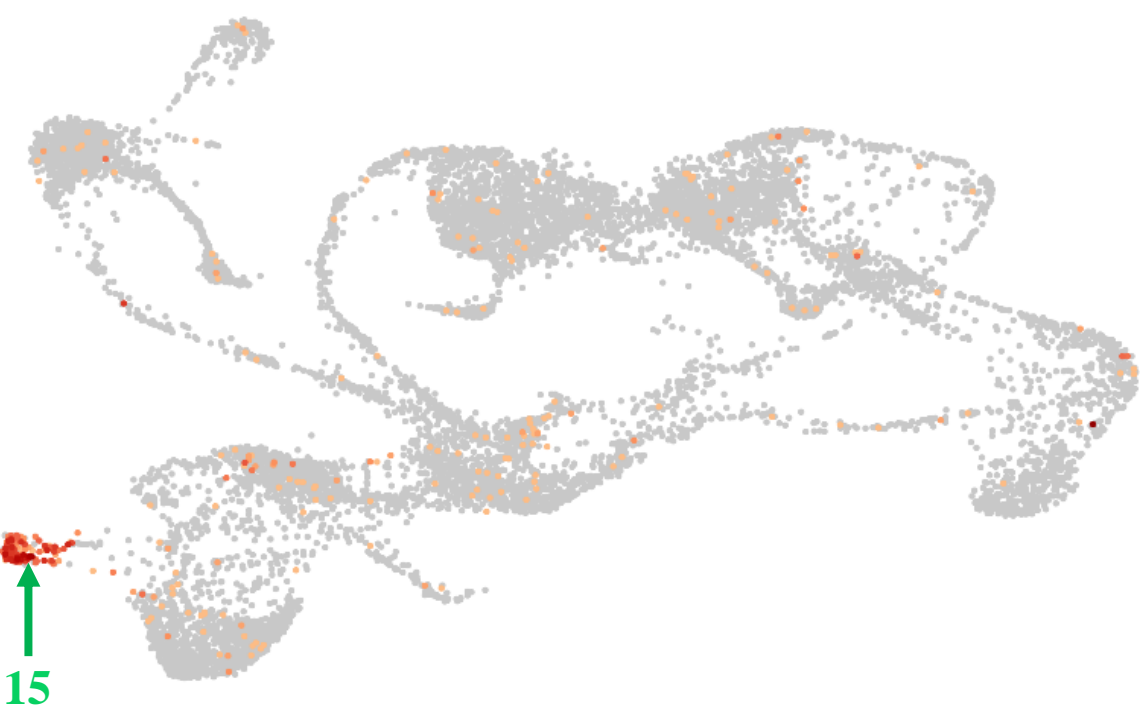

Phloem-specific gene

amino acid permease 4

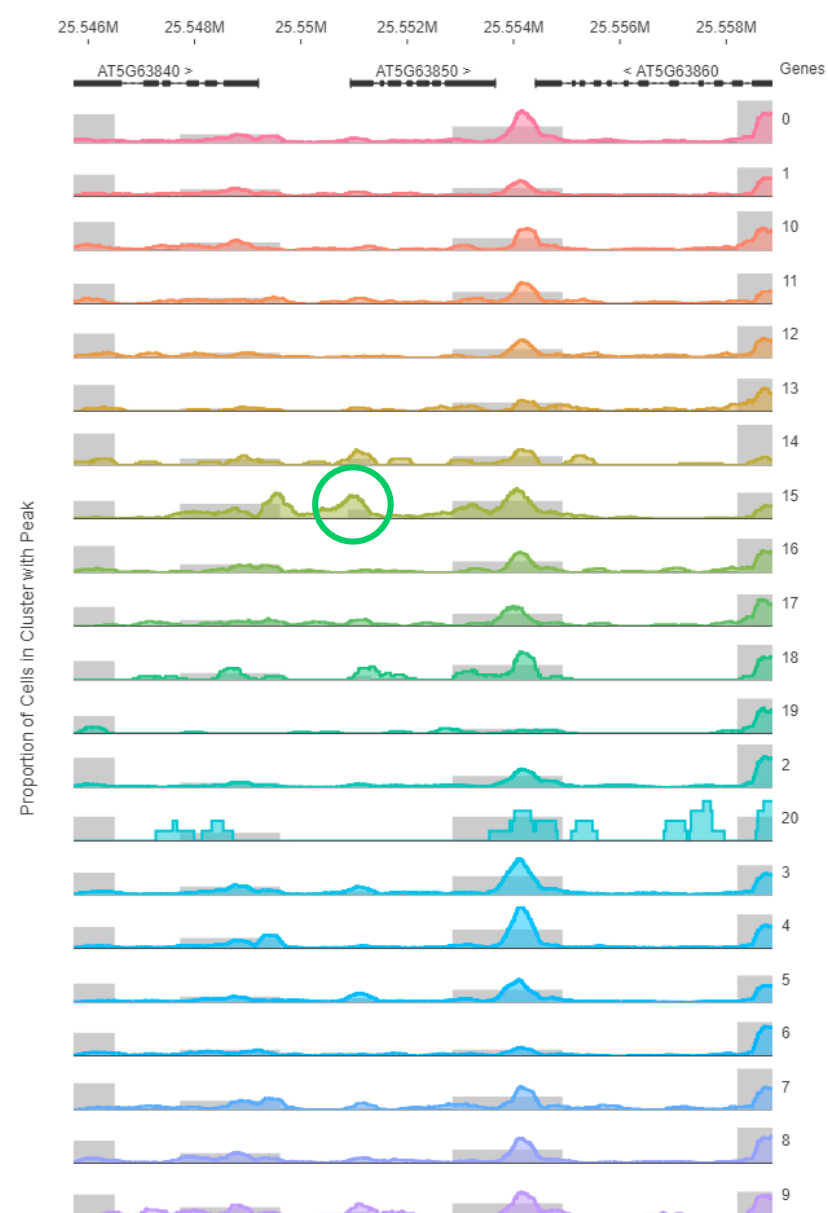

**Supplemental Figure 8.** Comparative analysis of the expression profile and chromatin folding of selected Arabidopsis genes. The left panels highlight the transcriptional activity of selected genes according to sc/sNucRNA-seq datasets (The relative levels of expression of the genes are highlighted in yellow/red color). When relevant, green arrows highlight the clusters where a gene was specifically expressed. The cluster number is indicated for information near to the arrow (see Figure 2A for the annotation of the 21 clusters). The right panels highlight the presence of sNucATAC-seq peaks nearby the TSS of the selected genes. The sc/sNucRNA-seq and sNucATAC-seq clusters are co-annotated to facilitate the comparative analysis. Green boxes and circles highlight major sNucATAC-seq peaks. Regarding At5g65590, a gene not expressed in any root cell type, the red box highlights the lack of open chromatin across the 21 sNucATAC-seq clusters.



snRNA-seq

At1g45201

snATAC-seq

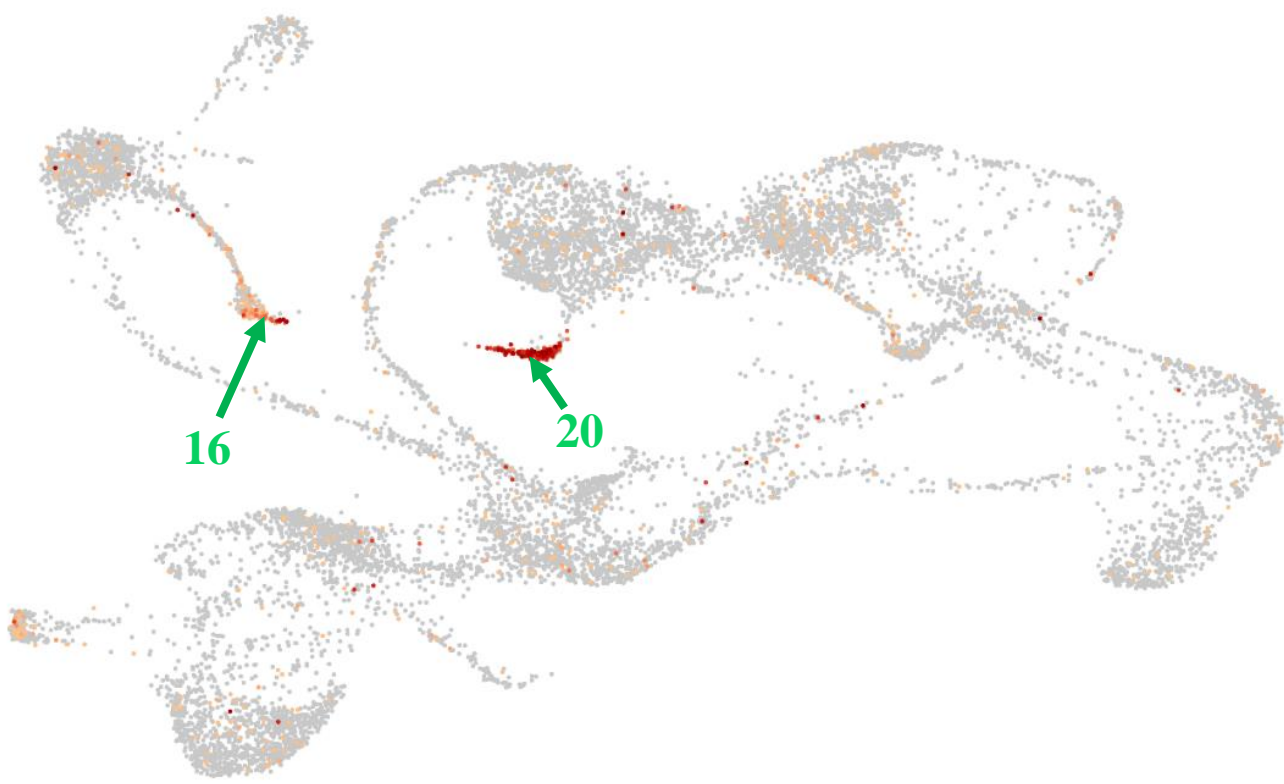

H cell-specific gene

**triacylglycerol lipase-like 1**

bioRxiv preprint doi: <https://doi.org/10.1101/2020.07.27.223156>; this version posted July 28, 2020. The copyright holder for this preprint (which was not certified by peer review) is the author/funder. All rights reserved. No reuse allowed without permission.

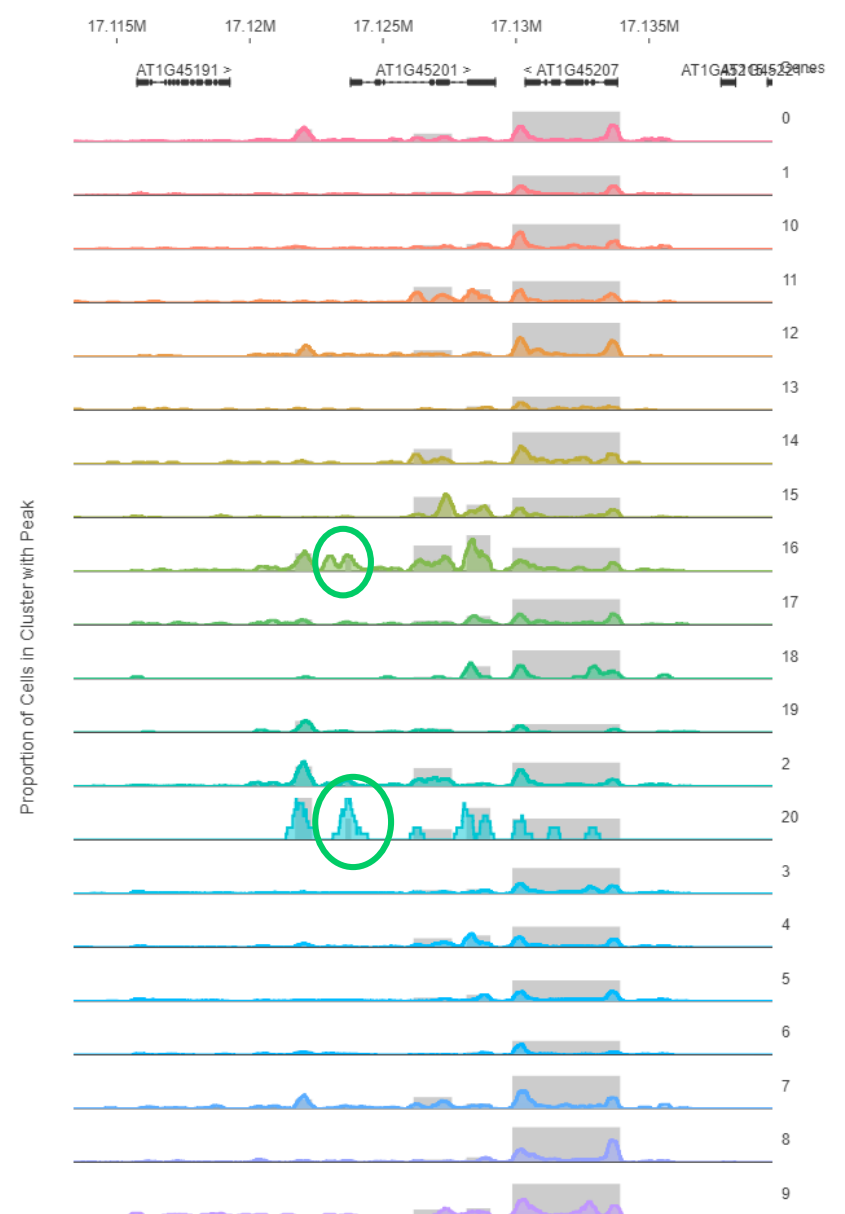

snRNA-seq

At3g58550

snATAC-seq

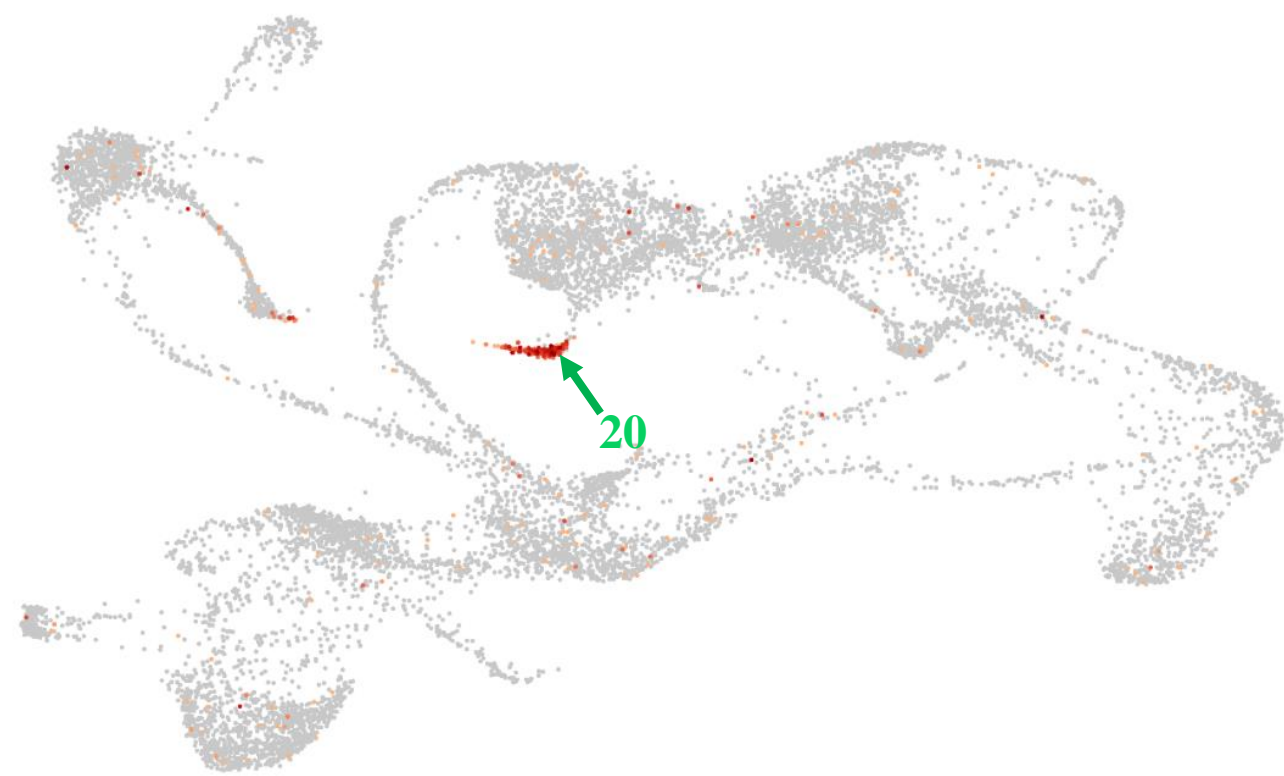

H cell-specific gene

**Bifunctional inhibitor/lipid-transfer protein/  
seed storage 2S albumin superfamily protein**

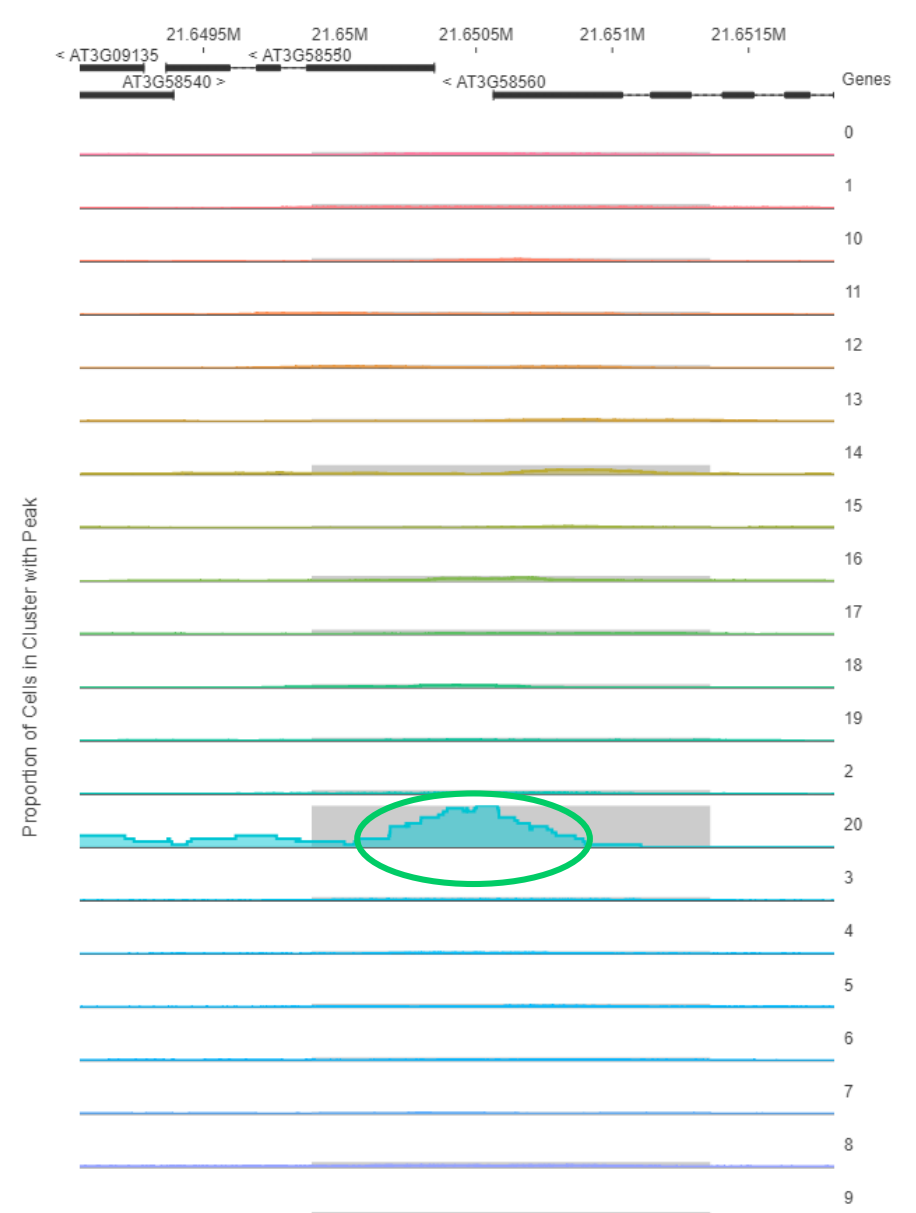

**Supplemental Figure 8.** Comparative analysis of the expression profile and chromatin folding of selected Arabidopsis genes. The left panels highlight the transcriptional activity of selected genes according to sc/sNucRNA-seq datasets (the relative levels of expression of the genes are highlighted in yellow/red color). When relevant, green arrows highlight the clusters where a gene was specifically expressed. The cluster number is indicated for information near to the arrow (see Figure 2A for the annotation of the 21 clusters). The right panels highlight the presence of sNucATAC-seq peaks nearby the TSS of the selected genes. The sc/sNucRNA-seq and sNucATAC-seq clusters are co-annotated to facilitate the comparative analysis. Green boxes and circles highlight major sNucATAC-seq peaks. Regarding At5g65590, a gene not expressed in any root cell type, the red box highlights the lack of open chromatin across the 21 sNucATAC-seq clusters.

snRNA-seq

At1g05260

snATAC-seq

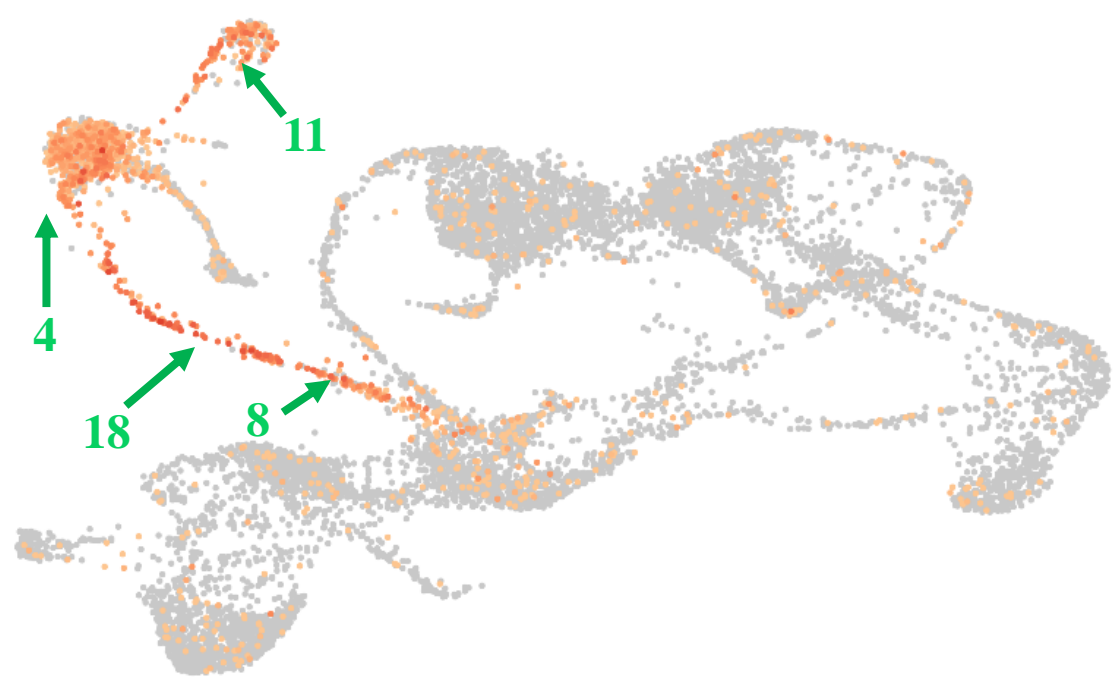

Endodermis-specific gene

RARE COLD INDUCIBLE GENE 3

bioRxiv preprint doi: <https://doi.org/10.1101/2020.07.27.223156>; this version posted July 28, 2020. The copyright holder for this preprint (which was not certified by peer review) is the author/funder. All rights reserved. No reuse allowed without permission.

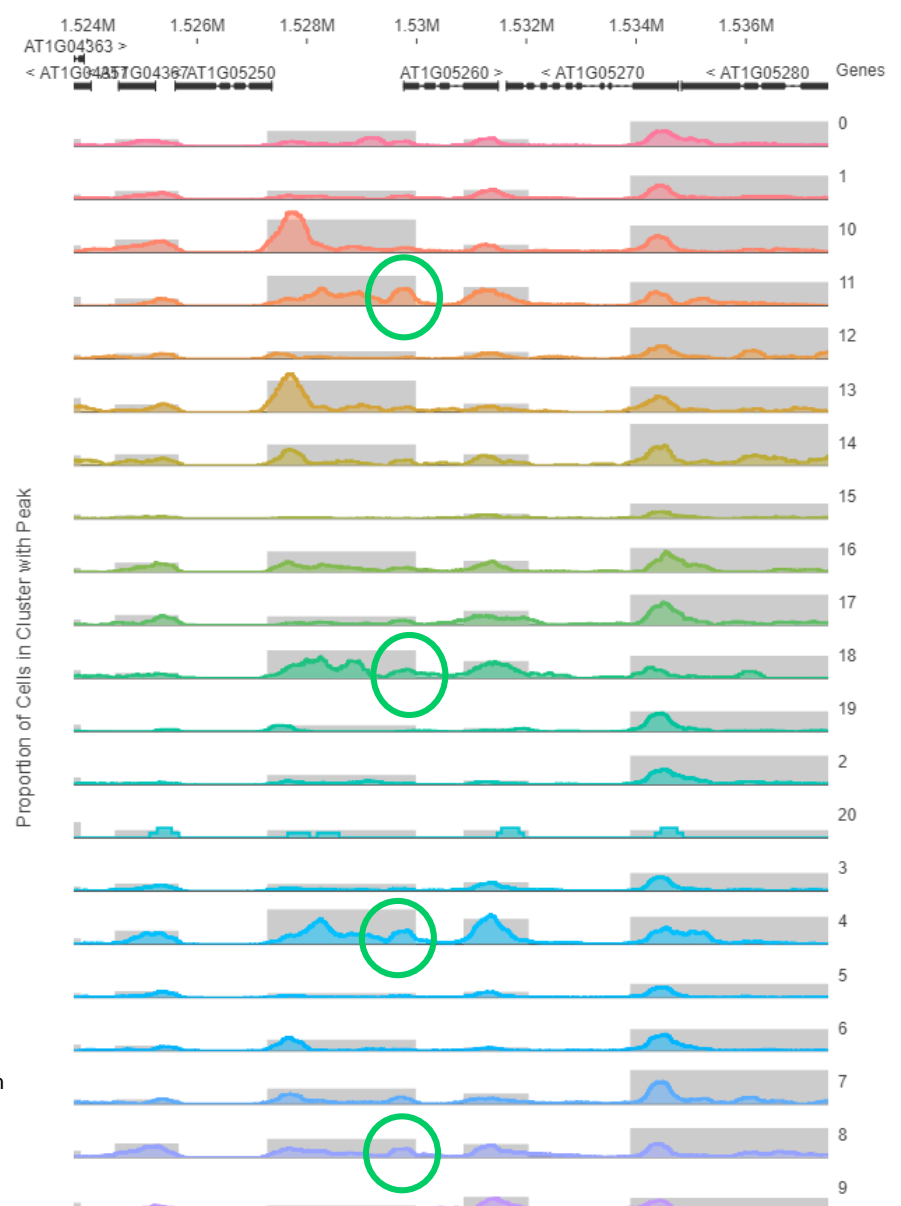

snRNA-seq

At3g55230

snATAC-seq

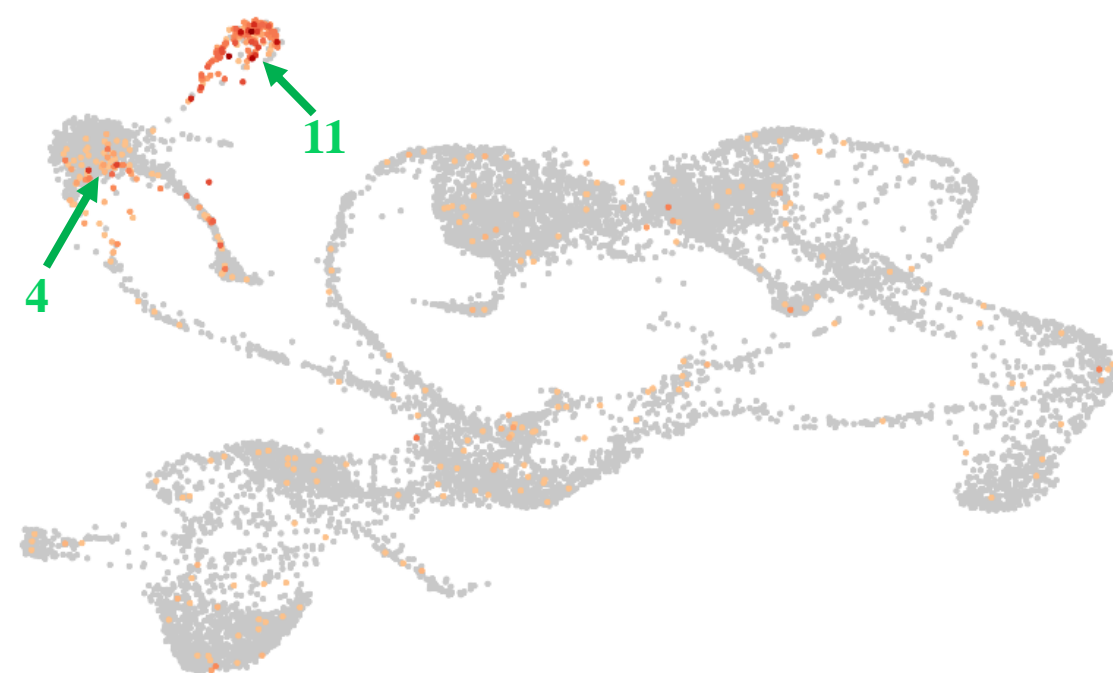

Endodermis-specific gene

Disease resistance-responsive  
(dirigent-like protein) family protein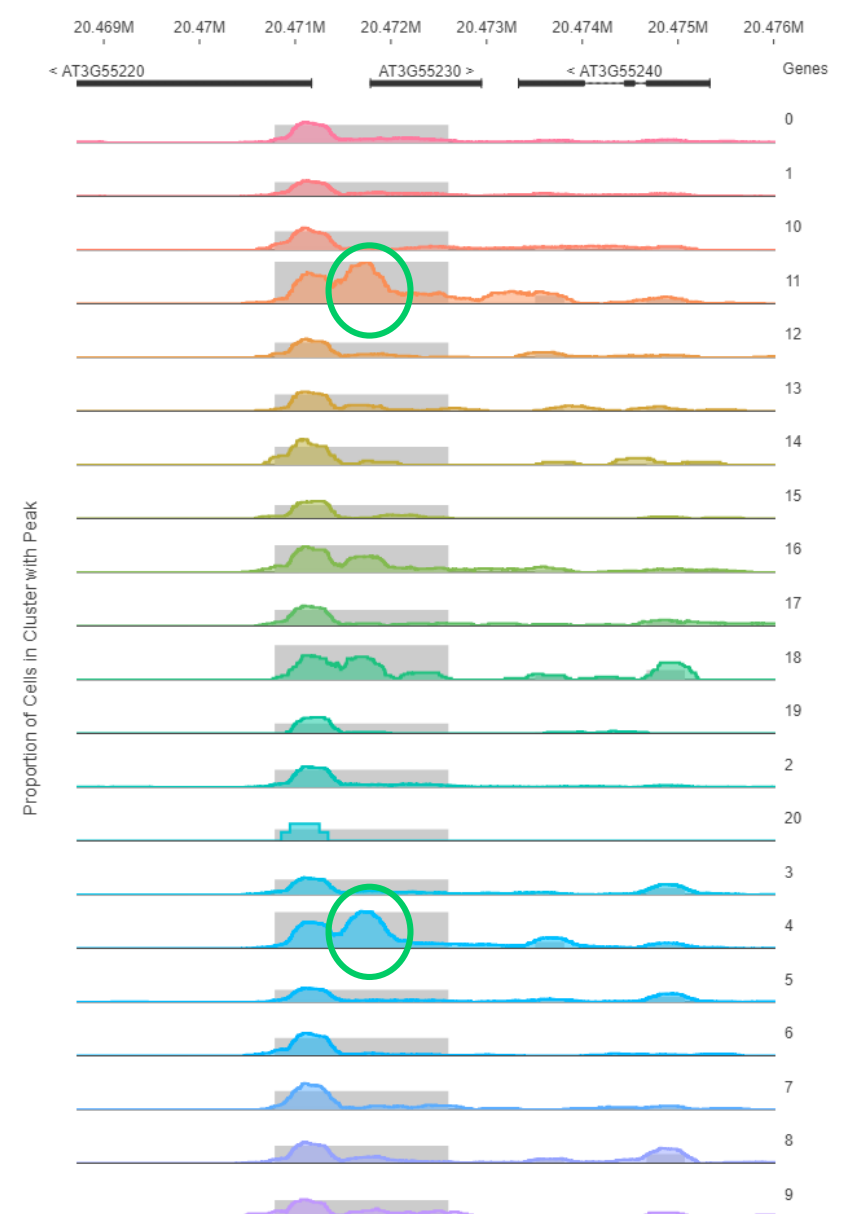

**Supplemental Figure 8.** Comparative analysis of the expression profile and chromatin folding of selected Arabidopsis genes. The left panels highlight the transcriptional activity of selected genes according to sc/sNucRNA-seq datasets (The relative levels of expression of the genes are highlighted in yellow/red color). When relevant, green arrows highlight the clusters where a gene was specifically expressed. The cluster number is indicated for information near to the arrow (see Figure 2A for the annotation of the 21 clusters). The right panels highlight the presence of sNucATAC-seq peaks nearby the TSS of the selected genes. The sc/sNucRNA-seq and sNucATAC-seq clusters are co-annotated to facilitate the comparative analysis. Green boxes and circles highlight major sNucATAC-seq peaks. Regarding At5g65590, a gene not expressed in any root cell type, the red box highlights the lack of open chromatin across the 21 sNucATAC-seq clusters.

snRNA-seq

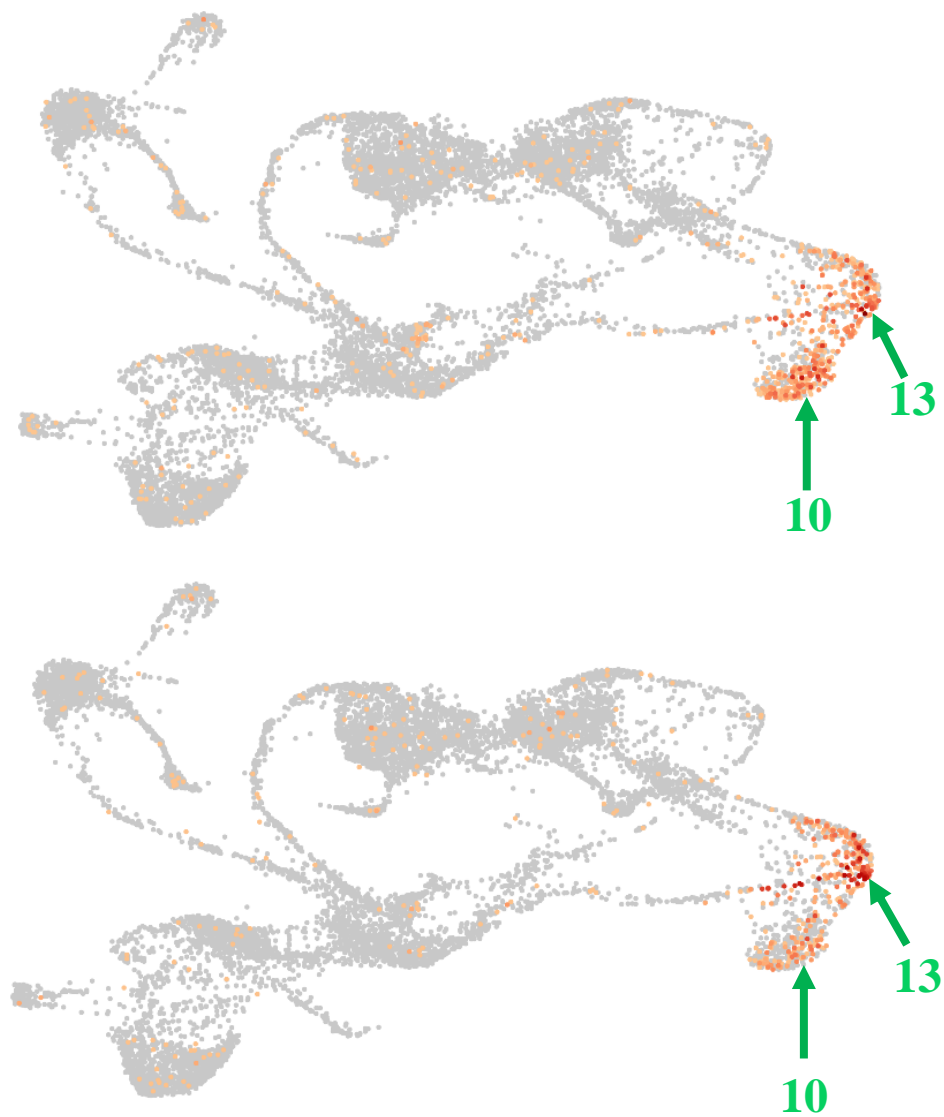At5g57530  
At5g57540

snATAC-seq

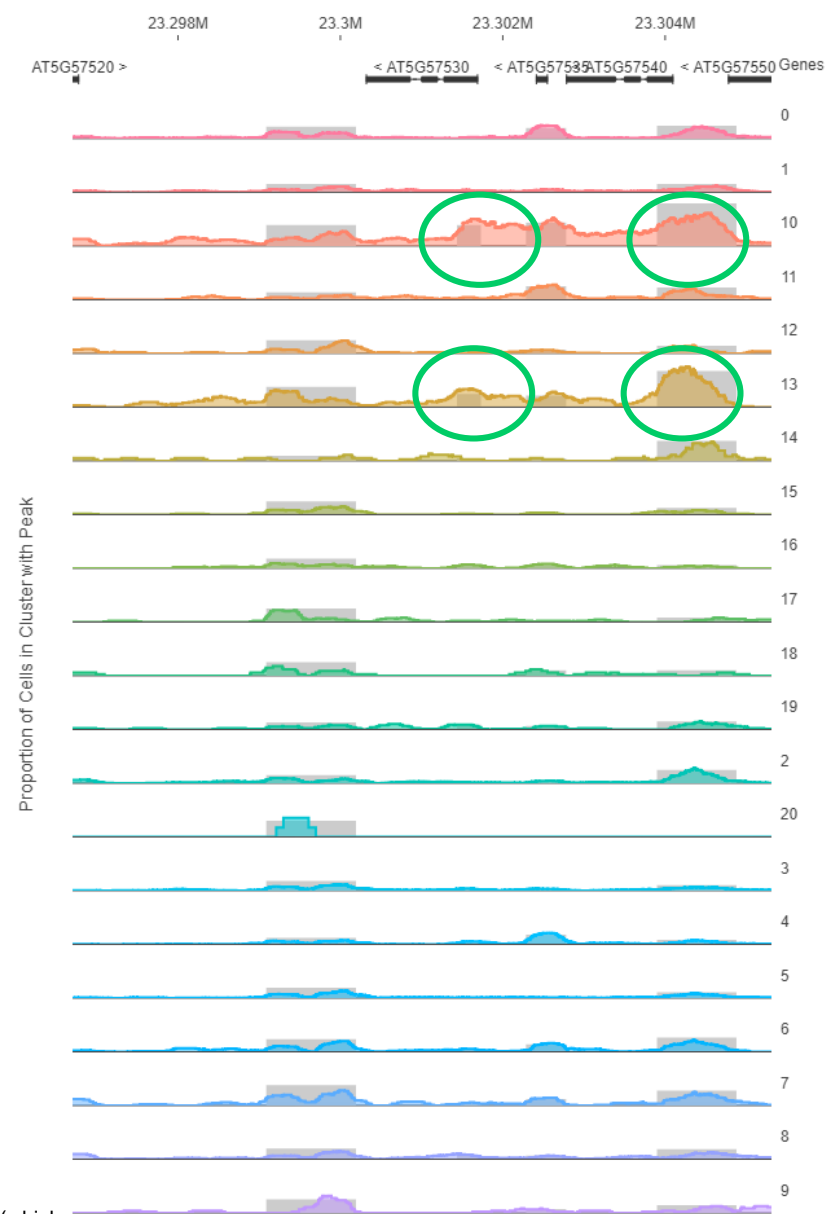**Trichome-specific genes**

bioRxiv preprint doi: <https://doi.org/10.1101/2020.07.27.223156>; this version posted July 28, 2020. The copyright holder for this preprint (which was not certified by peer review) is the author/funder. All rights reserved. No reuse allowed without permission.

**xyloglucan endotransglucosylase/  
hydrolase 12 and 13**

snRNA-seq

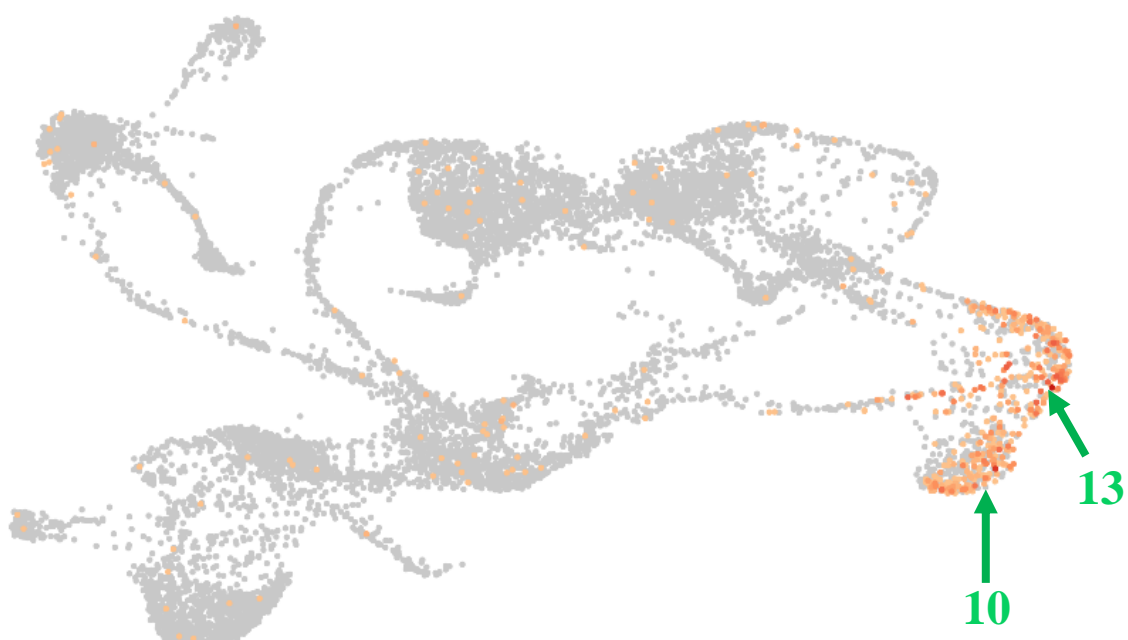

At3g60280

snATAC-seq

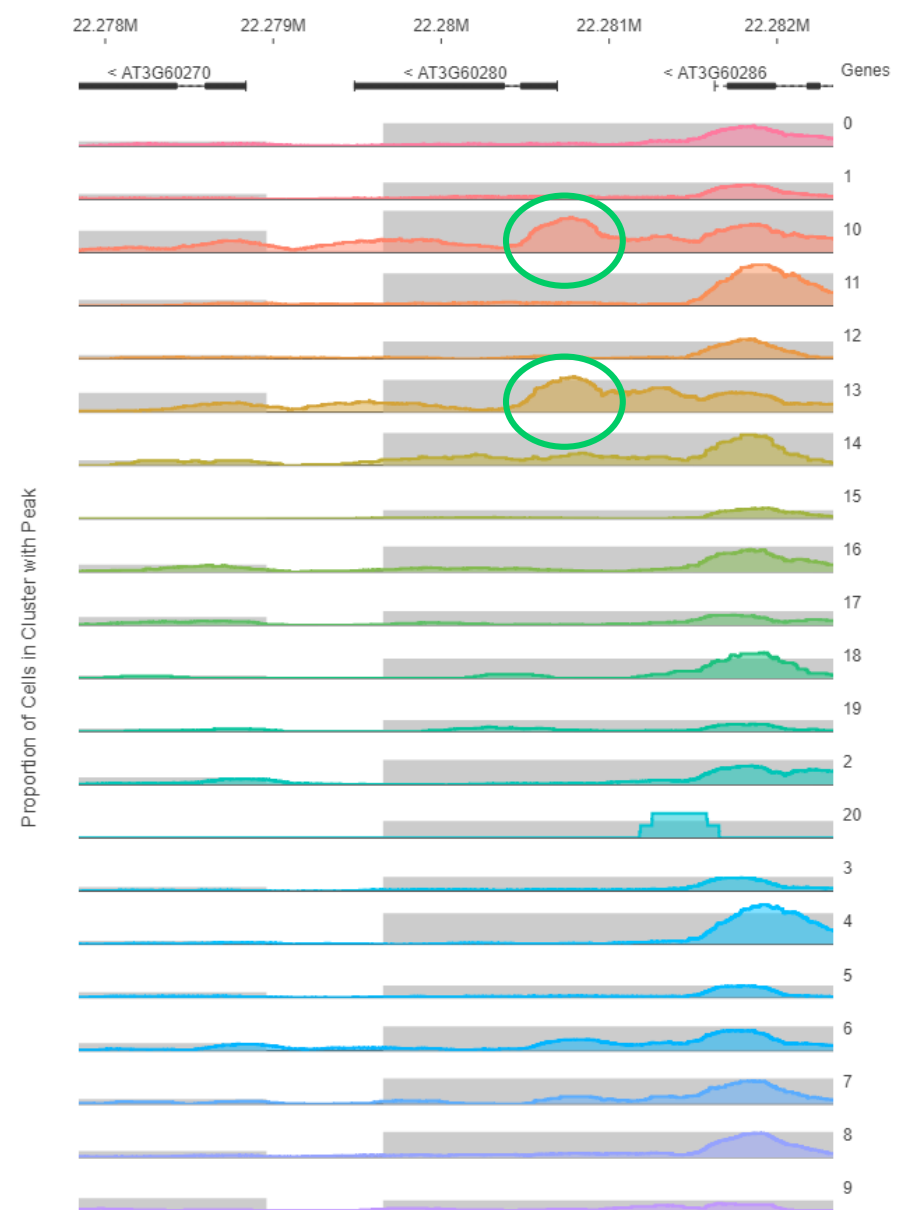**Trichome-specific gene****uclacyanin 3**

**Supplemental Figure 8.** Comparative analysis of the expression profile and chromatin folding of selected Arabidopsis genes. The left panels highlight the transcriptional activity of selected genes according to sc/sNucRNA-seq datasets (The relative levels of expression of the genes are highlighted in yellow/red color). When relevant, green arrows highlight the clusters where a gene was specifically expressed. The cluster number is indicated for information near to the arrow (see Figure 2A for the annotation of the 21 clusters). The right panels highlight the presence of sNucATAC-seq peaks nearby the TSS of the selected genes. The sc/sNucRNA-seq and sNucATAC-seq clusters are co-annotated to facilitate the comparative analysis. Green boxes and circles highlight major sNucATAC-seq peaks. Regarding At5g65590, a gene not expressed in any root cell type, the red box highlights the lack of open chromatin across the 21 sNucATAC-seq clusters.



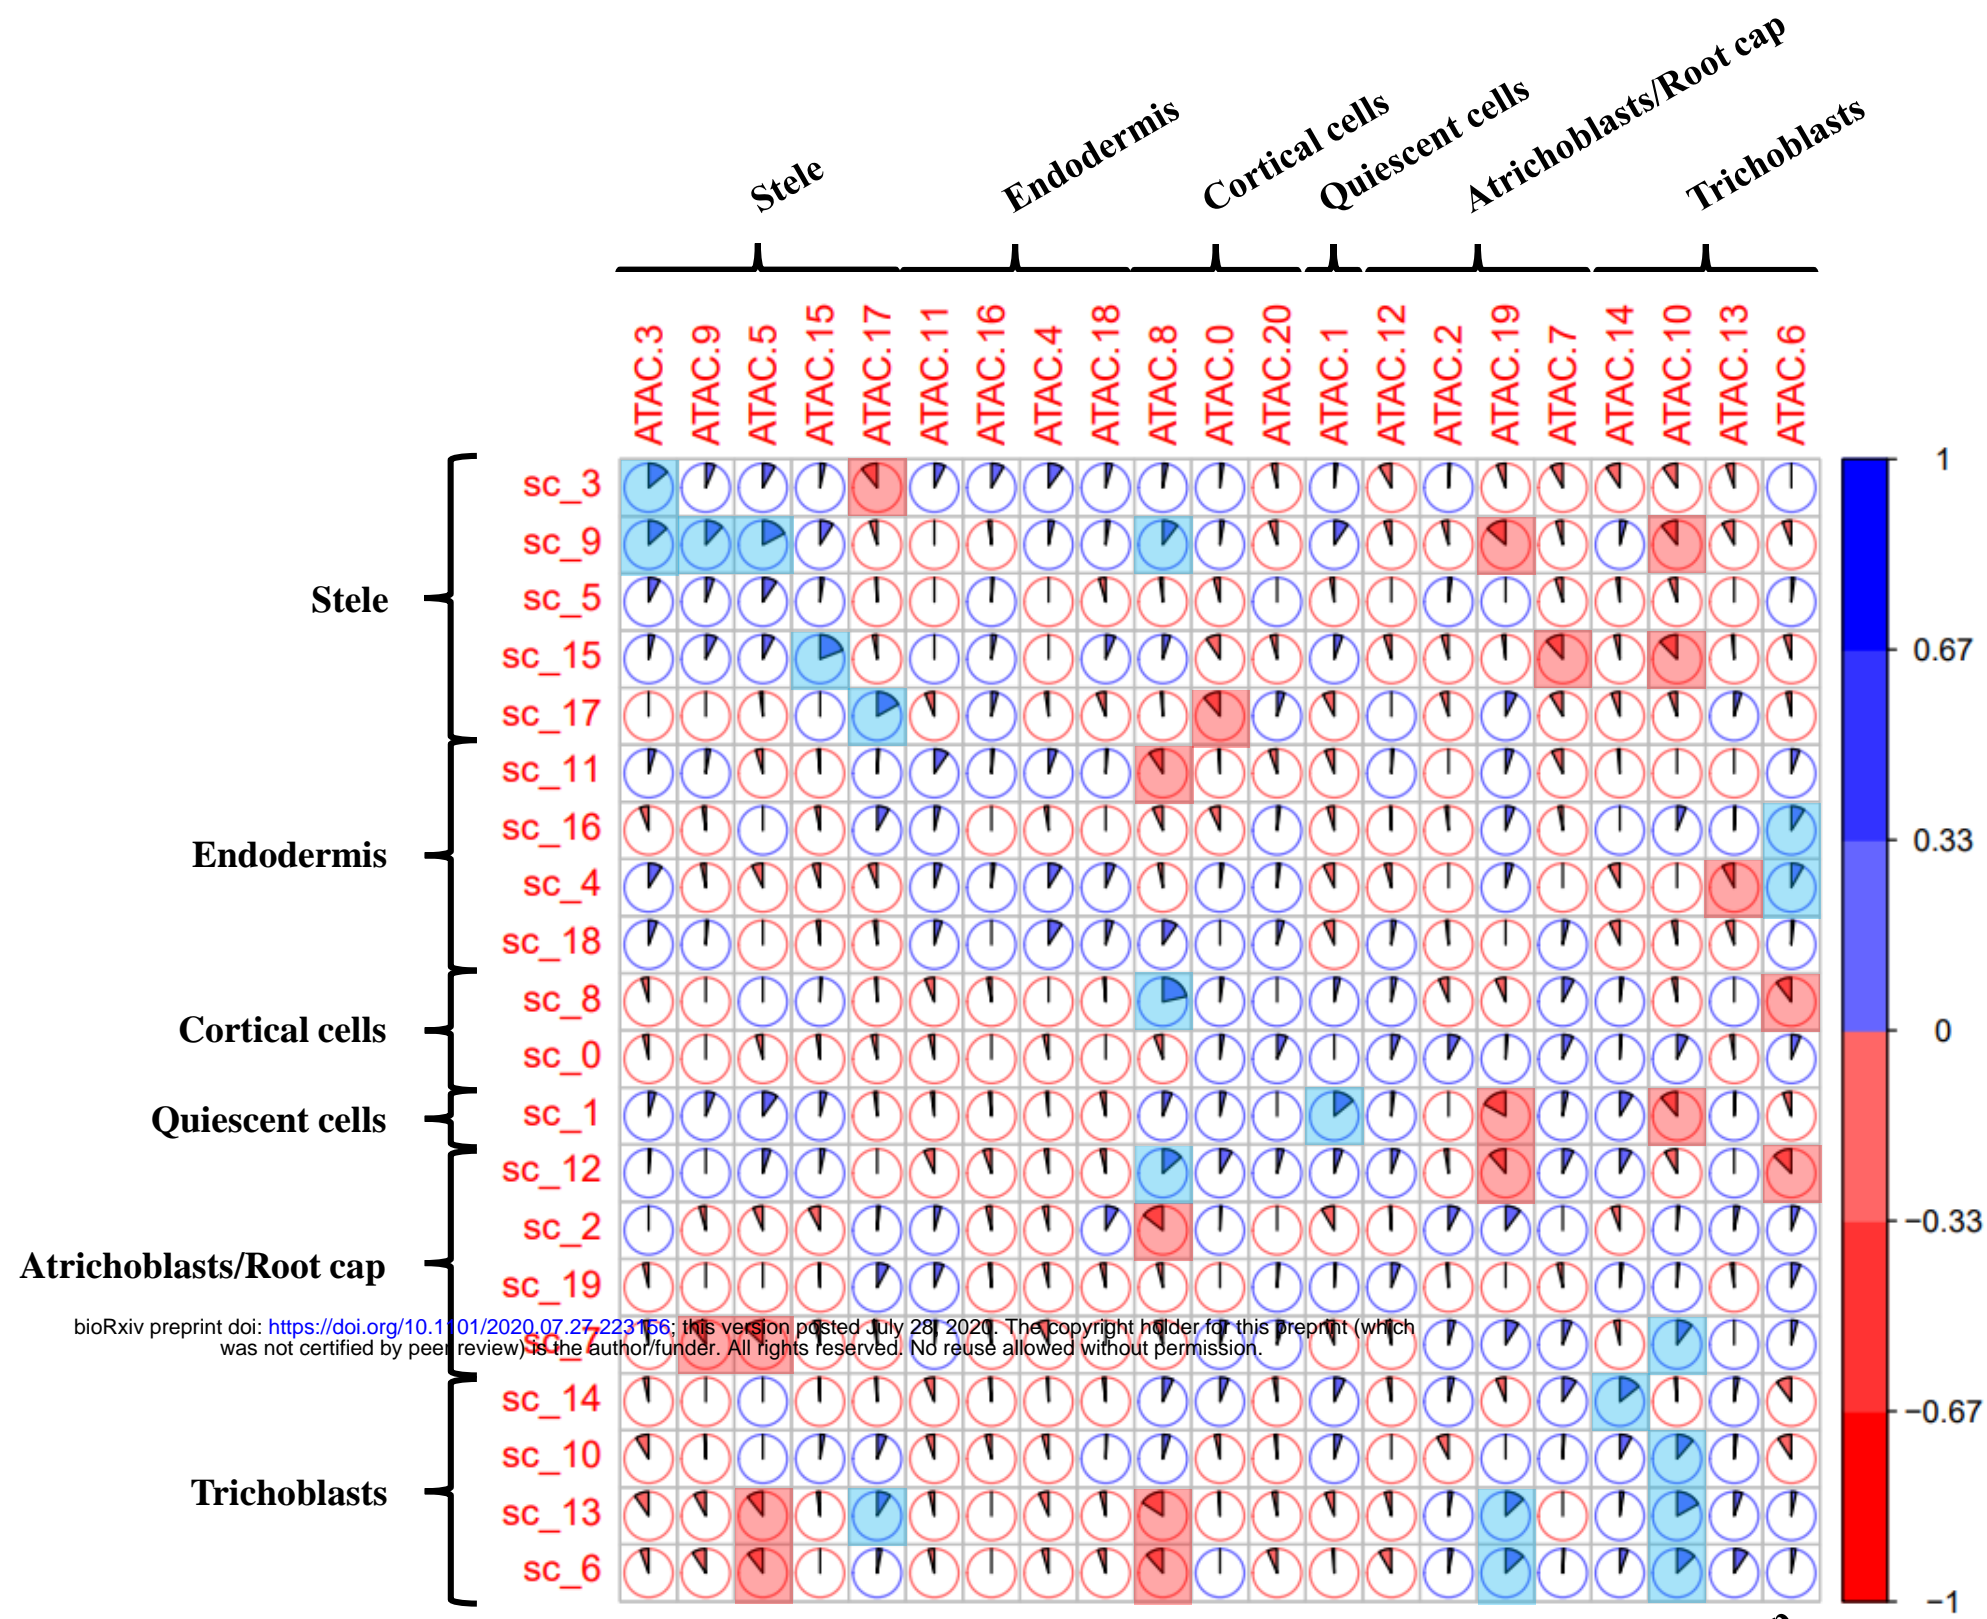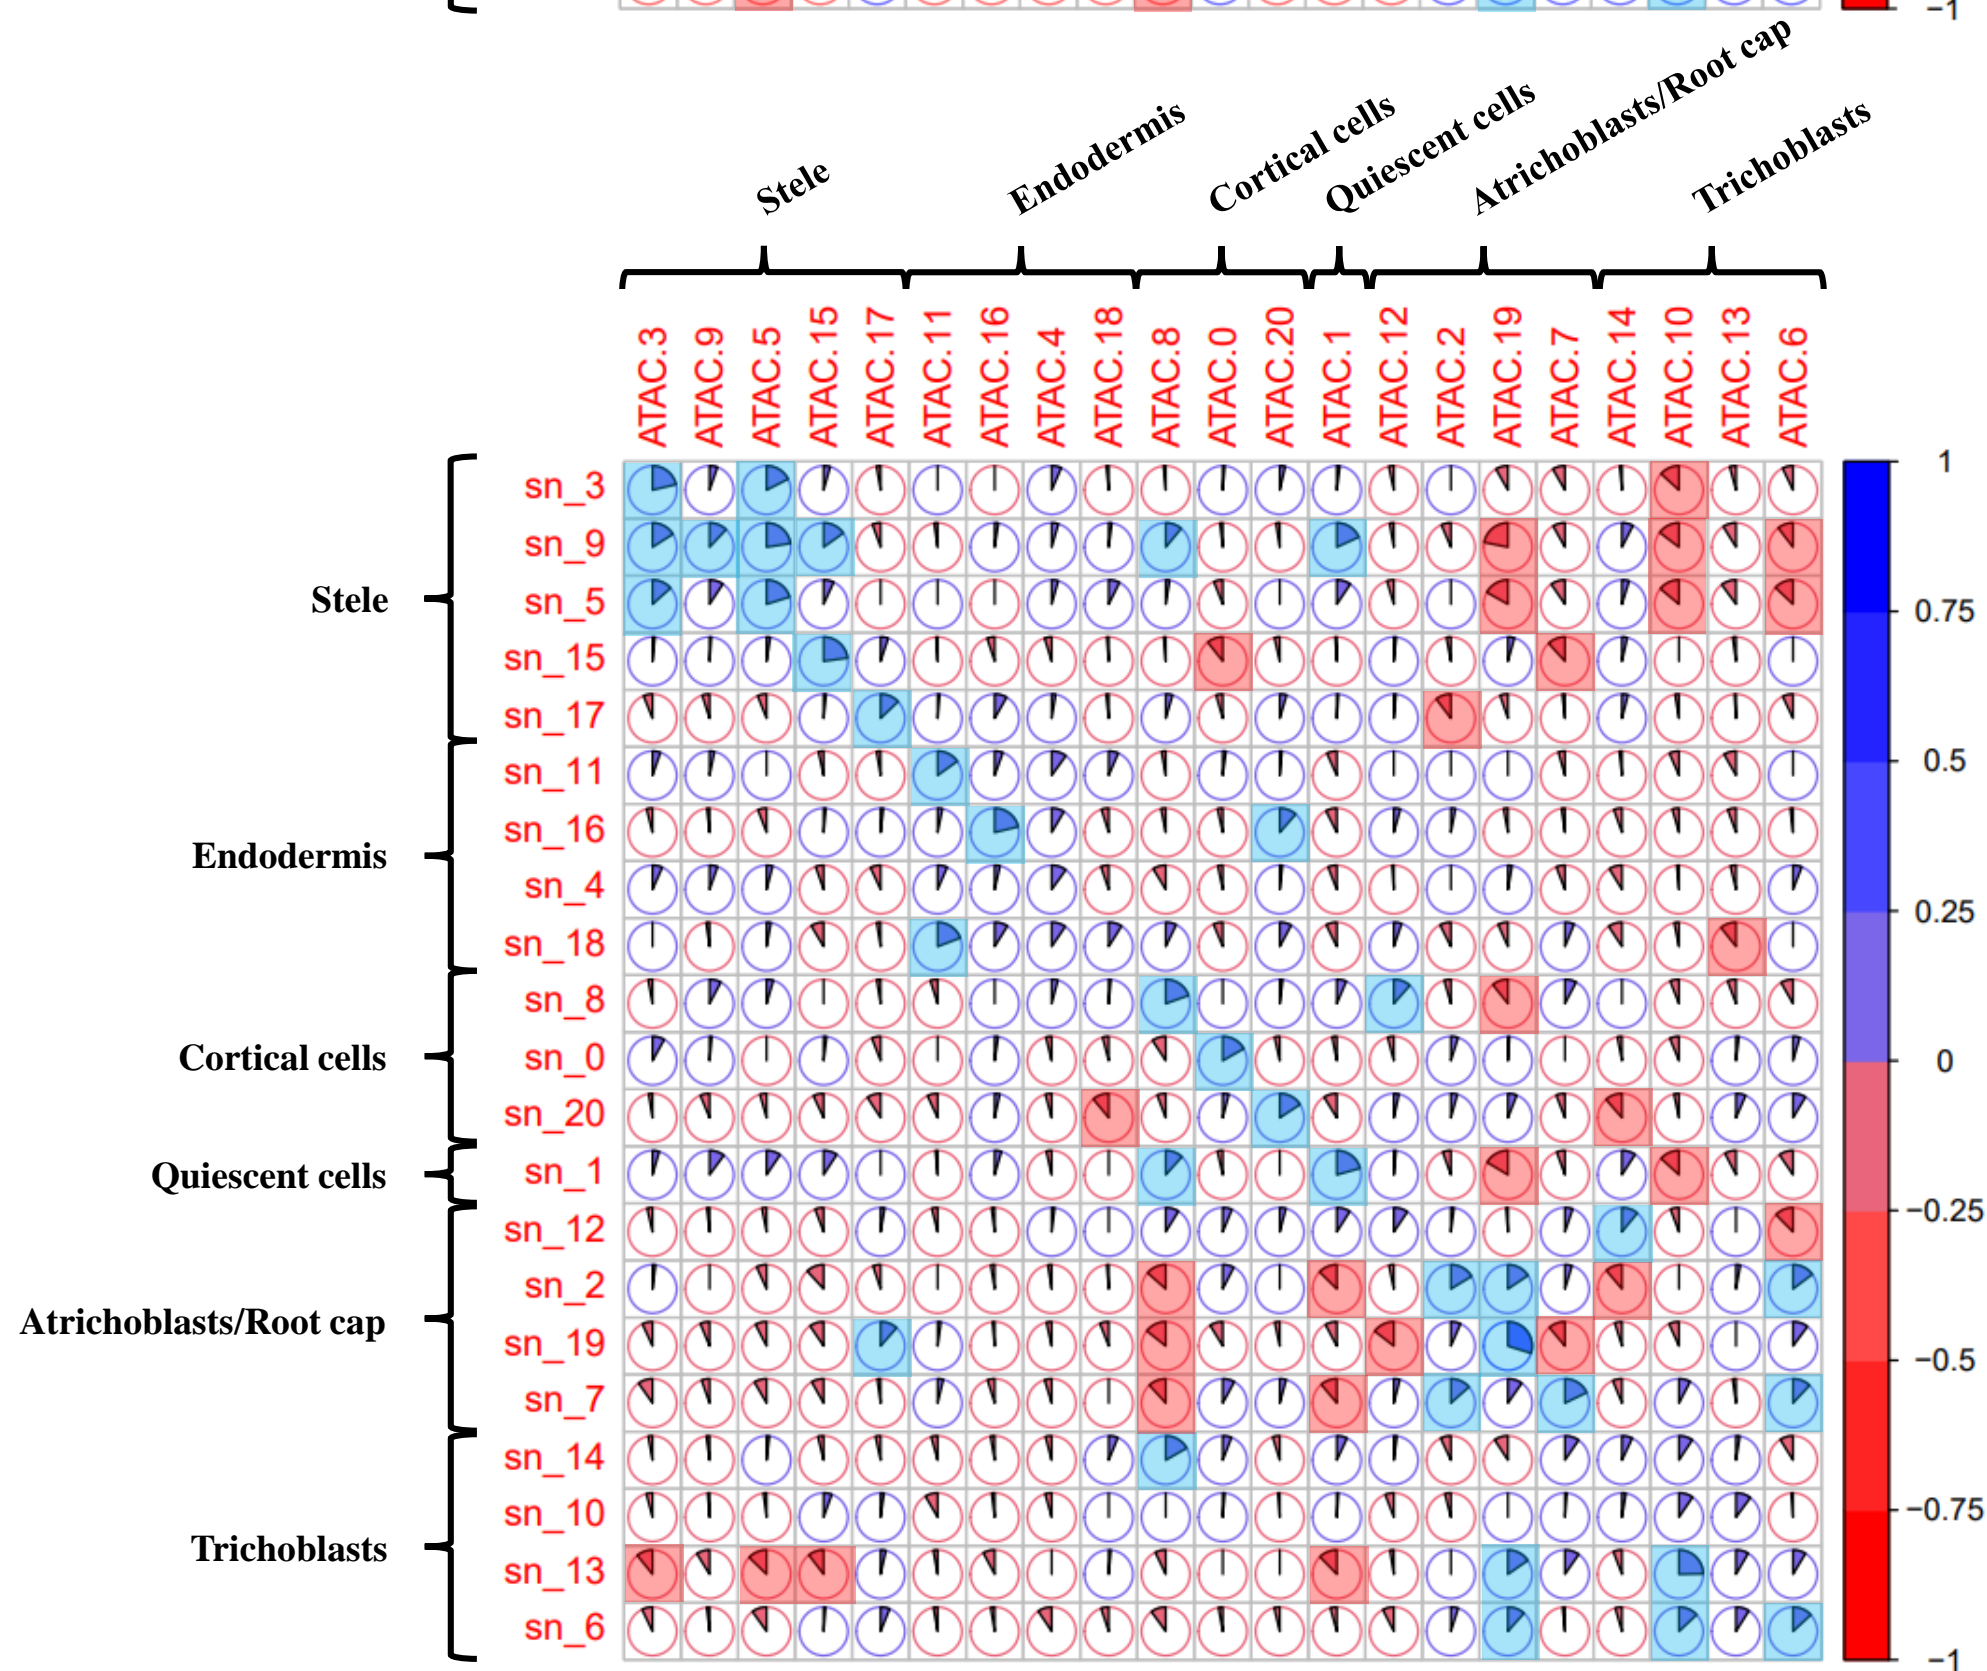

**Supplemental Figure 9.** Correlation analyses between gene expression and chromatin accessibility of 628 housekeeping genes for each of the 20 and 21 sc (A) and sNucRNA-seq clusters (B). For each correlation analysis, a Kendall tau-b correlation score was calculated based on the ranking of the cluster according to the expression level of the gene and the level of accessibility of the chromatin fiber (see pies). When significant ( $p$ -value  $< 0.01$ ), positive and negative correlations are highlighted in blue or red, respectively.
